# Supplementary material for: Pyridine-type alkaloid composition affects bacterial community composition of floral nectar
Source: PubMed Central journal article supplement (PMC4650603; doi:10.1038/srep11536), 2015-06-30
Supplement: srep11536-s1.pdf [file srep11536-s1.pdf]

# Pyridine-type alkaloid composition affects bacterial community composition of floral nectar

Yana Aizenberg-Gershtein, Ido Izhaki, Rakesh Santhanam, Pavan Kumar, Ian T. Baldwin and

Malka Halpern

## Supplementary data

**Fig. S1.** Neighbor-joining tree of bacterial communities isolated from nectar of *N. attenuata* WT (**A**) and nicotine free irPMT (**B**) plants. The tree was generated based on partial 16S rRNA gene sequences (~700 bp). Numbers at the nodes are percentage bootstrap values based on 1,000 resampled datasets. Bar - 0.05 substitutions per nucleotide position.

**Fig. S2.** Rarefaction curves indicating the observed number of operational taxonomic units (OTUs) at a genetic distance of 3% in different plant types. (**A**) Including all data sequencing (**B**) including subsample data only.

**Table S1.** Taxonomic classifications and abundances of all the OTUs within each plant type.

**Table S2.** Full taxonomic classifications in the genera level within each plant type.

Figure S1

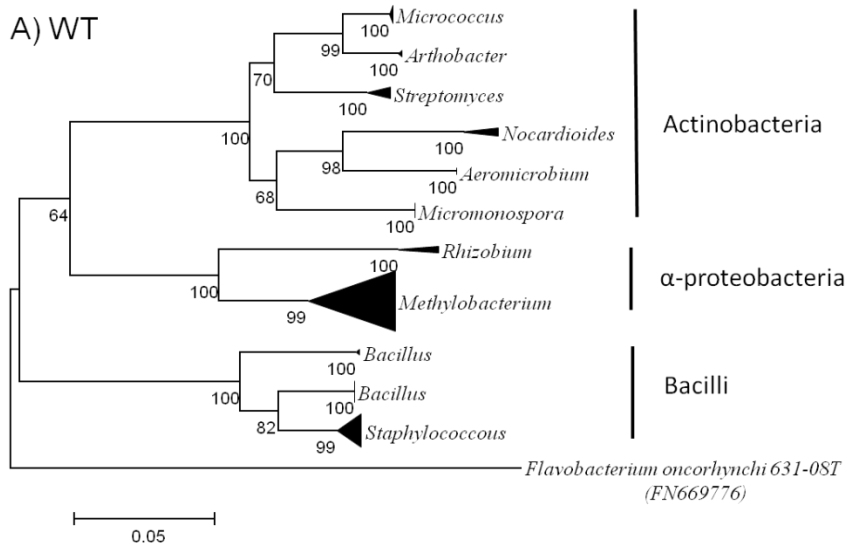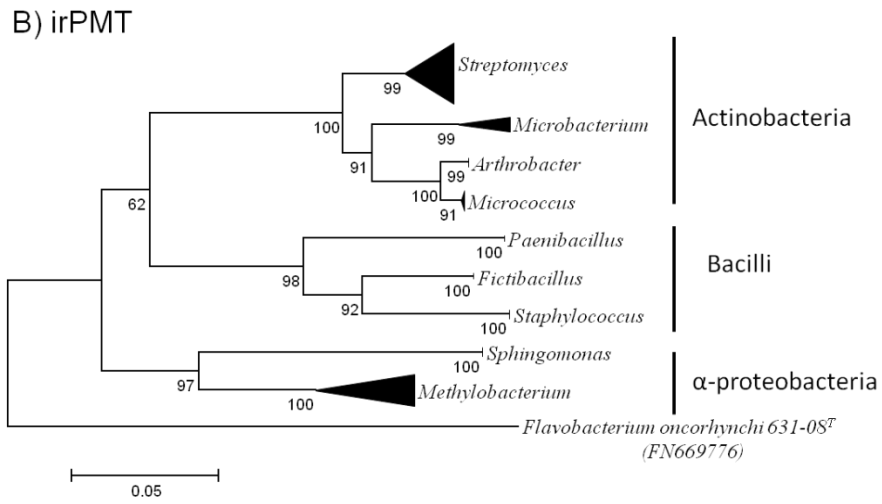

Figure S2

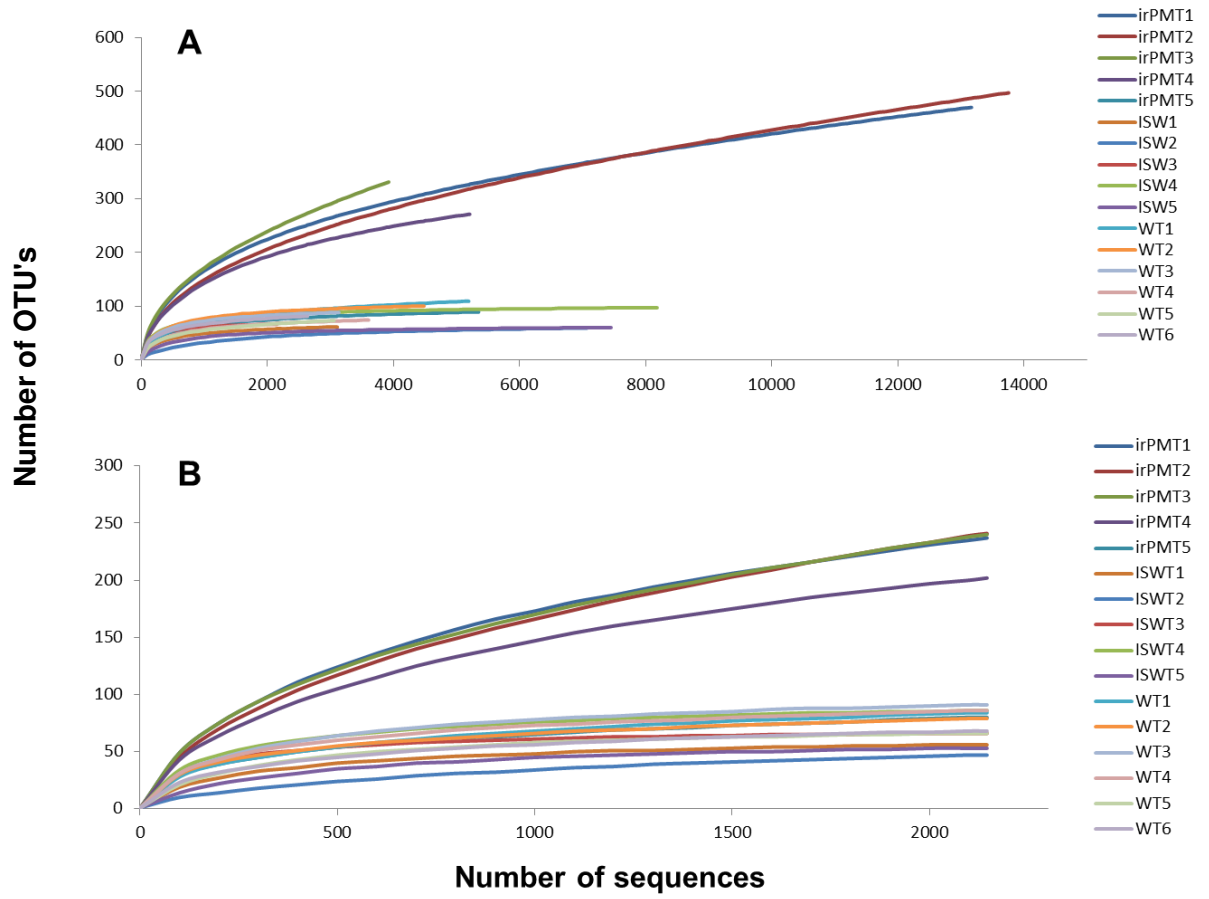

**Table S1: OTUs taxonomic classifications and their abundance within each plant type**

**Legend:** irPMT represent transformed *Nicotiana attenuata* samples, WT represent *Nicotiana attenuata* normal samples, ISWT represent *N. glauca* samples.

| Sample name | irPMT    | WT   | ISWT | Taxonomy Classification                                                                                                             |
|-------------|----------|------|------|-------------------------------------------------------------------------------------------------------------------------------------|
| OTU No.     | OTU Size |      |      |                                                                                                                                     |
| 1           | 5856     | 2004 | 2974 | 878 Bacteria(100);Firmicutes(100);Bacilli(100);Lactobacillales(100);Streptococcaceae(100);Streptococcus(100);                       |
| 2           | 1126     | 522  | 464  | 140 Bacteria(100);"Proteobacteria"(100);Betaproteobacteria(100);Neisseriales(100);Neisseriaceae(100);Neisseria(100);                |
| 3           | 2511     | 1065 | 1122 | 324 Bacteria(100);Firmicutes(100);Bacilli(100);Bacillales(100);Staphylococcaceae(100);Staphylococcus(100);                          |
| 4           | 684      | 246  | 311  | 127 Bacteria(100);"Fusobacteria"(100);"Fusobacteria"(100);"Fusobacteriales"(100);"Fusobacteriaceae"(100);Fusobacterium(100);        |
| 5           | 908      | 321  | 488  | 99 Bacteria(100);"Actinobacteria"(100);Actinobacteria(100);Actinomycetales(100);Actinomycetaceae(100);Actinomyces(100);             |
| 6           | 1368     | 285  | 1004 | 79 Bacteria(100);"Actinobacteria"(100);Actinobacteria(100);Actinomycetales(100);Micrococcaceae(100);Rothia(100);                    |
| 7           | 662      | 192  | 434  | 36 Bacteria(100);"Actinobacteria"(100);Actinobacteria(100);Actinomycetales(100);Corynebacteriaceae(100);Corynebacterium(99);        |
| 8           | 567      | 191  | 292  | 84 Bacteria(100);"Actinobacteria"(100);Actinobacteria(100);Actinomycetales(100);Corynebacteriaceae(100);Corynebacterium(100);       |
| 9           | 682      | 167  | 164  | 351 Bacteria(100);"Actinobacteria"(100);Actinobacteria(100);Actinomycetales(100);Corynebacteriaceae(100);Corynebacterium(100);      |
| 10          | 458      | 207  | 170  | 81 Bacteria(100);"Proteobacteria"(100);Gammaproteobacteria(100);Pasteurellales(100);Pasteurellaceae(100);unclassified(92);          |
| 11          | 289      | 100  | 114  | 75 Bacteria(100);"Proteobacteria"(100);Gammaproteobacteria(100);Pseudomonadales(100);Moraxellaceae(100);Acinetobacter(100);         |
| 12          | 669      | 134  | 81   | 454 Bacteria(100);"Proteobacteria"(100);Gammaproteobacteria(100);"Enterobacteriales"(100);Enterobacteriaceae(100);unclassified(96); |
| 13          | 98       | 65   | 33   | 0 Bacteria(100);"Proteobacteria"(100);Gammaproteobacteria(100);unclassified(83);unclassified(83);unclassified(83);                  |
| 14          | 334      | 124  | 194  | 16 Bacteria(100);Firmicutes(100);Clostridia(100);Clostridiales(100);unclassified(100);unclassified(100);                            |
| 15          | 401      | 136  | 143  | 122 Bacteria(100);"Actinobacteria"(100);Actinobacteria(100);Actinomycetales(100);Micrococcaceae(100);Micrococcus(98);               |
| 16          | 176      | 85   | 51   | 40 Bacteria(100);Firmicutes(100);Negativicutes(100);Selenomonadales(100);Veillonellaceae(100);Veillonella(100);                     |
| 17          | 214      | 172  | 42   | 0 Bacteria(100);"Actinobacteria"(100);Actinobacteria(100);Bifidobacteriales(100);Bifidobacteriaceae(100);Gardnerella(100);          |
| 18          | 802      | 239  | 205  | 358 Bacteria(100);Firmicutes(100);Clostridia(100);Clostridiales(100);Clostridiales_Incertae_Sedis_XI(100);Finegoldia(100);          |

|    |      |     |      |     |                                                                                                                                                                                                                                                            |
|----|------|-----|------|-----|------------------------------------------------------------------------------------------------------------------------------------------------------------------------------------------------------------------------------------------------------------|
| 19 | 220  | 110 | 39   | 71  | Bacteria(100);Firmicutes(100);Clostridia(100);Clostridiales(100);Clostridiales_Incertae_Sedis_XI(100);Anaerococcus(100);<br>Bacteria(100);"Proteobacteria"(100);Gammaproteobacteria(100);"Enterobacteriales"(100);Enterobacteriaceae(100);unclassified(100 |
| 20 | 455  | 225 | 223  | 7   | );                                                                                                                                                                                                                                                         |
| 21 | 489  | 159 | 192  | 138 | Bacteria(100);Firmicutes(100);Bacilli(100);Bacillales(100);Bacillales_Incertae_Sedis_XI(100);Gemella(100);                                                                                                                                                 |
| 22 | 287  | 106 | 131  | 50  | Bacteria(100);Firmicutes(100);Bacilli(100);Lactobacillales(100);Carnobacteriaceae(78);unclassified(56);                                                                                                                                                    |
| 23 | 242  | 129 | 85   | 28  | Bacteria(100);"Actinobacteria"(100);Actinobacteria(100);Actinomycetales(100);Micrococcaceae(100);Rothia(100);                                                                                                                                              |
| 24 | 233  | 76  | 65   | 92  | Bacteria(100);Firmicutes(100);Clostridia(100);Clostridiales(100);Clostridiales_Incertae_Sedis_XI(100);Peptoniphilus(100);                                                                                                                                  |
| 25 | 219  | 111 | 75   | 33  | Bacteria(100);"Proteobacteria"(100);Betaproteobacteria(100);Neisseriales(100);Neisseriaceae(100);unclassified(55);                                                                                                                                         |
| 26 | 113  | 40  | 48   | 25  | Bacteria(100);"Actinobacteria"(100);Actinobacteria(100);Actinomycetales(100);Actinomycetaceae(100);Actinomyces(100);<br>Bacteria(100);"Proteobacteria"(100);Gammaproteobacteria(100);Pseudomonadales(100);Pseudomonadaceae(100);Pseudomonas(9              |
| 27 | 176  | 46  | 40   | 90  | 1);                                                                                                                                                                                                                                                        |
| 28 | 204  | 117 | 18   | 69  | 7);                                                                                                                                                                                                                                                        |
| 29 | 190  | 96  | 40   | 54  | Bacteria(100);"Actinobacteria"(100);Actinobacteria(100);Actinomycetales(100);Corynebacteriaceae(100);Corynebacterium(99);                                                                                                                                  |
| 30 | 180  | 58  | 79   | 43  | Bacteria(100);"Bacteroidetes"(100);"Bacteroidia"(100);"Bacteroidales"(100);"Porphyromonadaceae"(100);Porphyromonas(93);                                                                                                                                    |
| 31 | 151  | 73  | 25   | 53  | Bacteria(100);Firmicutes(100);Clostridia(100);Clostridiales(100);Clostridiales_Incertae_Sedis_XI(100);Anaerococcus(100);                                                                                                                                   |
| 32 | 98   | 33  | 60   | 5   | Bacteria(100);Firmicutes(100);Negativicutes(100);Selenomonadales(100);Veillonellaceae(100);Selenomonas(66);                                                                                                                                                |
| 33 | 224  | 70  | 111  | 43  | Bacteria(100);"Actinobacteria"(100);Actinobacteria(100);Actinomycetales(100);unclassified(100);unclassified(100);                                                                                                                                          |
| 34 | 166  | 125 | 41   | 0   | Bacteria(100);Firmicutes(100);Bacilli(100);Lactobacillales(100);Lactobacillaceae(100);Lactobacillus(100);                                                                                                                                                  |
| 35 | 66   | 34  | 13   | 19  | Bacteria(100);"Actinobacteria"(100);Actinobacteria(100);Actinomycetales(100);Corynebacteriaceae(100);Corynebacterium(100);                                                                                                                                 |
| 36 | 75   | 40  | 25   | 10  | Bacteria(100);"Fusobacteria"(100);"Fusobacteria"(100);"Fusobacteriales"(100);"Leptotrichiaceae"(100);Leptotrichia(100);                                                                                                                                    |
| 37 | 115  | 56  | 59   | 0   | Bacteria(100);unclassified(100);unclassified(100);unclassified(100);unclassified(100);unclassified(100);                                                                                                                                                   |
| 38 | 128  | 38  | 34   | 56  | Bacteria(100);"Proteobacteria"(100);Gammaproteobacteria(100);Pseudomonadales(100);Moraxellaceae(100);Acinetobacter(100);<br>Bacteria(100);"Proteobacteria"(100);Gammaproteobacteria(100);"Enterobacteriales"(100);Enterobacteriaceae(100);unclassified(100 |
| 39 | 1586 | 35  | 1543 | 8   | );                                                                                                                                                                                                                                                         |
| 40 | 159  | 44  | 47   | 68  | Bacteria(100);"Bacteroidetes"(100);unclassified(71);unclassified(71);unclassified(71);unclassified(71);                                                                                                                                                    |
| 41 | 127  | 39  | 31   | 57  | Bacteria(100);"Proteobacteria"(100);Gammaproteobacteria(100);Oceanospirillales(100);Halomonadaceae(100);Halomonas(99);                                                                                                                                     |
| 42 | 148  | 77  | 61   | 10  | Bacteria(100);Firmicutes(100);Bacilli(100);Lactobacillales(100);Streptococcaceae(100);Streptococcus(100);                                                                                                                                                  |

|    |     |    |     |     |                                                                                                                                   |
|----|-----|----|-----|-----|-----------------------------------------------------------------------------------------------------------------------------------|
| 43 | 191 | 49 | 34  | 108 | Bacteria(100);"Proteobacteria"(100);Gammaproteobacteria(100);Pasteurellales(100);Pasteurellaceae(100);unclassified(100);          |
| 44 | 72  | 42 | 28  | 2   | Bacteria(100);"Fusobacteria"(100);"Fusobacteria"(100);"Fusobacteriales"(100);"Leptotrichiaceae"(100);Leptotrichia(100);           |
| 45 | 112 | 39 | 53  | 20  | Bacteria(100);"Actinobacteria"(100);Actinobacteria(100);Actinomycetales(100);Propionibacteriaceae(100);Propionibacterium(100);    |
| 46 | 63  | 28 | 32  | 3   | Bacteria(100);"Bacteroidetes"(100);Flavobacteria(100);"Flavobacteriales"(100);Flavobacteriaceae(100);Capnocytophaga(100);         |
| 47 | 186 | 21 | 150 | 15  | Bacteria(100);"Proteobacteria"(100);Alphaproteobacteria(100);Rhodobacterales(100);Rhodobacteraceae(100);Paracoccus(81);           |
| 48 | 63  | 41 | 22  | 0   | Bacteria(100);"Proteobacteria"(100);Betaproteobacteria(100);Neisseriales(100);Neisseriaceae(100);unclassified(95);                |
| 49 | 139 | 66 | 45  | 28  | Bacteria(100);Firmicutes(100);Bacilli(100);Lactobacillales(100);Carnobacteriaceae(100);Granulicatella(100);                       |
| 50 | 72  | 29 | 23  | 20  | Bacteria(100);Firmicutes(100);Clostridia(100);Clostridiales(100);Clostridiales_Incertae_Sedis_XI(100);Anaerococcus(100);          |
| 51 | 173 | 49 | 40  | 84  | Bacteria(100);"Proteobacteria"(100);Betaproteobacteria(100);Burkholderiales(100);Comamonadaceae(100);Pelomonas(98);               |
| 52 | 142 | 89 | 31  | 22  | Bacteria(100);Firmicutes(100);Bacilli(100);Lactobacillales(100);Streptococcaceae(100);Lactococcus(100);                           |
| 53 | 56  | 27 | 17  | 12  | Bacteria(100);"Proteobacteria"(100);Gammaproteobacteria(100);Oceanospirillales(100);Halomonadaceae(100);Halomonas(89);            |
| 54 | 115 | 31 | 36  | 48  | Bacteria(100);unclassified(55);unclassified(55);unclassified(55);unclassified(55);unclassified(55);                               |
| 55 | 84  | 33 | 11  | 40  | Bacteria(100);"Actinobacteria"(100);Actinobacteria(100);Actinomycetales(100);Corynebacteriaceae(81);Corynebacterium(81);          |
| 56 | 60  | 33 | 23  | 4   | Bacteria(100);"Bacteroidetes"(100);"Bacteroidia"(100);"Bacteroidales"(100);"Porphyromonadaceae"(100);Porphyromonas(100);          |
| 57 | 39  | 23 | 16  | 0   | Bacteria(100);"Proteobacteria"(100);Epsilonproteobacteria(100);Campylobacterales(100);Campylobacteraceae(100);Campylobacter(100); |
| 58 | 89  | 44 | 17  | 28  | Bacteria(100);"Bacteroidetes"(100);Flavobacteria(100);"Flavobacteriales"(100);Flavobacteriaceae(100);Capnocytophaga(100);         |
| 59 | 43  | 30 | 12  | 1   | Bacteria(100);"Proteobacteria"(100);Gammaproteobacteria(100);Cardiobacteriales(100);Cardiobacteriaceae(100);Cardiobacterium(100); |
| 60 | 46  | 20 | 24  | 2   | Bacteria(100);"Bacteroidetes"(100);"Bacteroidia"(100);"Bacteroidales"(100);"Prevotellaceae"(100);Prevotella(100);                 |
| 61 | 37  | 23 | 13  | 1   | Bacteria(100);"Bacteroidetes"(100);"Bacteroidia"(100);"Bacteroidales"(100);"Prevotellaceae"(100);Prevotella(100);                 |
| 62 | 50  | 31 | 19  | 0   | Bacteria(100);"Bacteroidetes"(100);"Bacteroidia"(100);"Bacteroidales"(100);"Prevotellaceae"(100);Prevotella(100);                 |
| 63 | 101 | 41 | 26  | 34  | Bacteria(100);Firmicutes(100);Clostridia(100);Clostridiales(100);Peptostreptococcaceae(100);Peptostreptococcus(100);              |
| 64 | 27  | 17 | 10  | 0   | Bacteria(100);unclassified(100);unclassified(100);unclassified(100);unclassified(100);unclassified(100);                          |
| 65 | 100 | 90 | 0   | 10  | Bacteria(100);"Bacteroidetes"(100);Flavobacteria(100);"Flavobacteriales"(100);Flavobacteriaceae(100);Chryseobacterium(100);       |
| 66 | 52  | 38 | 5   | 9   | Bacteria(100);"Actinobacteria"(100);Actinobacteria(100);Actinomycetales(100);Micrococcaceae(98);unclassified(60);                 |
| 67 | 215 | 17 | 198 | 0   | Bacteria(100);Firmicutes(100);Bacilli(100);Lactobacillales(100);Enterococcaceae(99);Enterococcus(98);                             |

|    |      |    |     |     |                                                                                                                                                                                                                                                   |
|----|------|----|-----|-----|---------------------------------------------------------------------------------------------------------------------------------------------------------------------------------------------------------------------------------------------------|
| 68 | 40   | 16 | 20  | 4   | Bacteria(100);Firmicutes(100);Negativicutes(100);Selenomonadales(100);Veillonellaceae(100);Dialister(100);                                                                                                                                        |
| 69 | 56   | 35 | 18  | 3   | Bacteria(100);Firmicutes(100);Clostridia(100);Clostridiales(100);Clostridiales_Incertae_Sedis_XI(100);Peptoniphilus(100);                                                                                                                         |
| 70 | 45   | 21 | 22  | 2   | Bacteria(100);Firmicutes(100);Clostridia(100);Clostridiales(100);unclassified(100);unclassified(100);                                                                                                                                             |
| 71 | 19   | 10 | 2   | 7   | Bacteria(100);"Proteobacteria"(100);Alphaproteobacteria(100);Caulobacterales(100);Caulobacteraceae(100);Brevundimonas(100);                                                                                                                       |
| 72 | 31   | 19 | 6   | 6   | Bacteria(100);"Bacteroidetes"(100);"Bacteroidia"(100);"Bacteroidales"(100);"Porphyromonadaceae"(100);Porphyromonas(100);                                                                                                                          |
| 73 | 36   | 18 | 13  | 5   | Bacteria(100);Firmicutes(100);Bacilli(100);Lactobacillales(100);Aerococcaceae(95);Abiotrophia(95);                                                                                                                                                |
| 74 | 77   | 16 | 5   | 56  | Bacteria(100);Firmicutes(100);Bacilli(100);Lactobacillales(100);Lactobacillaceae(100);Lactobacillus(97);                                                                                                                                          |
| 75 | 149  | 20 | 28  | 101 | Bacteria(100);"Proteobacteria"(100);Gammaproteobacteria(100);Pseudomonadales(100);Moraxellaceae(100);Enhydrobacter(100);                                                                                                                          |
| 76 | 36   | 21 | 15  | 0   | Bacteria(100);"Proteobacteria"(100);Betaproteobacteria(100);Neisseriales(100);Neisseriaceae(100);Kingella(100);<br>Bacteria(100);"Proteobacteria"(100);Gammaproteobacteria(100);"Enterobacteriales"(100);Enterobacteriaceae(100);unclassified(100 |
| 77 | 5435 | 11 | 4   | ### | );                                                                                                                                                                                                                                                |
| 78 | 17   | 14 | 2   | 1   | Bacteria(100);"Bacteroidetes"(100);"Bacteroidia"(100);"Bacteroidales"(100);"Prevotellaceae"(100);Prevotella(100);                                                                                                                                 |
| 79 | 19   | 13 | 6   | 0   | Bacteria(100);"Actinobacteria"(100);Actinobacteria(100);Actinomycetales(100);Actinomycetaceae(100);Actinomyces(100);                                                                                                                              |
| 80 | 10   | 8  | 2   | 0   | Bacteria(100);"Fusobacteria"(100);"Fusobacteria"(100);"Fusobacteriales"(100);"Leptotrichiaceae"(100);Leptotrichia(100);                                                                                                                           |
| 81 | 29   | 20 | 9   | 0   | Bacteria(100);Firmicutes(100);Clostridia(100);Clostridiales(100);Lachnospiraceae(100);unclassified(100);                                                                                                                                          |
| 82 | 74   | 15 | 18  | 41  | Bacteria(100);Firmicutes(100);Negativicutes(100);Selenomonadales(100);Veillonellaceae(100);Veillonella(92);<br>Bacteria(100);"Proteobacteria"(100);Alphaproteobacteria(100);Sphingomonadales(100);Sphingomonadaceae(100);Sphingomonas(9           |
| 83 | 10   | 9  | 0   | 1   | 1);                                                                                                                                                                                                                                               |
| 84 | 291  | 46 | 198 | 47  | Bacteria(100);"Proteobacteria"(100);Gammaproteobacteria(100);Aeromonadales(100);Aeromonadaceae(100);Aeromonas(100);                                                                                                                               |
| 85 | 24   | 10 | 14  | 0   | Bacteria(100);"Actinobacteria"(100);Actinobacteria(100);Actinomycetales(100);Actinomycetaceae(100);Actinomyces(100);<br>Bacteria(100);"Proteobacteria"(100);Gammaproteobacteria(100);Alteromonadales(100);Alteromonadaceae(100);Marinobacter(100  |
| 86 | 26   | 10 | 4   | 12  | );                                                                                                                                                                                                                                                |
| 87 | 20   | 8  | 2   | 10  | Bacteria(100);"Proteobacteria"(100);Betaproteobacteria(100);Burkholderiales(100);Oxalobacteraceae(100);Naxibacter(52);                                                                                                                            |
| 88 | 54   | 24 | 25  | 5   | Bacteria(100);"Actinobacteria"(100);Actinobacteria(100);Actinomycetales(100);Dietziaceae(100);Dietzia(100);                                                                                                                                       |
| 89 | 29   | 22 | 6   | 1   | Bacteria(100);Firmicutes(100);Clostridia(100);Clostridiales(100);unclassified(100);unclassified(100);<br>Bacteria(100);"Proteobacteria"(100);Gammaproteobacteria(100);Cardiobacteriales(100);Cardiobacteriaceae(100);Cardiobacterium(1            |
| 90 | 14   | 14 | 0   | 0   | 00);                                                                                                                                                                                                                                              |
| 91 | 32   | 19 | 10  | 3   | Bacteria(100);Firmicutes(100);Clostridia(100);Clostridiales(100);Clostridiales_Incertae_Sedis_XI(100);Anaerococcus(100);                                                                                                                          |

|     |    |    |    |    |                                                                                                                                                  |
|-----|----|----|----|----|--------------------------------------------------------------------------------------------------------------------------------------------------|
| 92  | 25 | 11 | 2  | 12 | Bacteria(100);"Bacteroidetes"(100);Flavobacteria(100);"Flavobacteriales"(100);Flavobacteriaceae(100);Capnocytophaga(100);                        |
| 93  | 15 | 12 | 3  | 0  | Bacteria(100);"Actinobacteria"(100);Actinobacteria(100);Actinomycetales(100);Intrasporangiaceae(100);Janibacter(59);                             |
| 94  | 41 | 28 | 4  | 9  | Bacteria(100);Firmicutes(96);unclassified(96);unclassified(96);unclassified(96);unclassified(96);                                                |
| 95  | 9  | 9  | 0  | 0  | Bacteria(100);Firmicutes(100);Clostridia(100);Clostridiales(100);unclassified(100);unclassified(100);                                            |
| 96  | 33 | 20 | 7  | 6  | Bacteria(100);Firmicutes(100);Clostridia(100);Clostridiales(100);Clostridiales_Incertae_Sedis_XI(100);Peptoniphilus(100);                        |
| 97  | 19 | 9  | 0  | 10 | Bacteria(100);"Proteobacteria"(100);Alphaproteobacteria(100);Rhizobiales(100);Bradyrhizobiaceae(100);Bosea(100);                                 |
| 98  | 8  | 8  | 0  | 0  | Bacteria(100);Firmicutes(100);Clostridia(100);Clostridiales(100);unclassified(70);unclassified(70);                                              |
| 99  | 11 | 10 | 1  | 0  | Bacteria(100);Firmicutes(100);Clostridia(100);Clostridiales(100);Lachnospiraceae(100);unclassified(100);                                         |
| 100 | 27 | 17 | 7  | 3  | Bacteria(100);"Bacteroidetes"(100);"Bacteroidia"(100);"Bacteroidales"(100);"Porphyromonadaceae"(100);Porphyromonas(100);                         |
| 101 | 8  | 7  | 1  | 0  | Bacteria(100);"Bacteroidetes"(100);"Bacteroidia"(100);"Bacteroidales"(100);"Prevotellaceae"(100);Prevotella(100);                                |
| 102 | 24 | 13 | 5  | 6  | Bacteria(100);"Actinobacteria"(100);Actinobacteria(100);Actinomycetales(100);Brevibacteriaceae(100);Brevibacterium(100);                         |
| 103 | 30 | 18 | 10 | 2  | Bacteria(100);"Bacteroidetes"(100);"Bacteroidia"(100);"Bacteroidales"(100);"Prevotellaceae"(100);Prevotella(100);                                |
| 104 | 5  | 5  | 0  | 0  | Bacteria(100);TM7(100);TM7_class_incertae_sedis(100);TM7_order_incertae_sedis(100);TM7_family_incertae_sedis(100);TM7_genus_incertae_sedis(100); |
| 105 | 38 | 6  | 32 | 0  | Bacteria(100);Firmicutes(100);Bacilli(100);Lactobacillales(100);Leuconostocaceae(100);Weissella(100);                                            |
| 106 | 12 | 11 | 1  | 0  | Bacteria(100);Firmicutes(100);Bacilli(100);Lactobacillales(100);Leuconostocaceae(100);Leuconostoc(100);                                          |
| 107 | 7  | 6  | 0  | 1  | Bacteria(100);SR1(100);SR1_class_incertae_sedis(100);SR1_order_incertae_sedis(100);SR1_family_incertae_sedis(100);SR1_genus_incertae_sedis(100); |
| 108 | 16 | 9  | 4  | 3  | Bacteria(100);"Fusobacteria"(100);"Fusobacteria"(100);"Fusobacteriales"(100);"Leptotrichiaceae"(100);Leptotrichia(100);                          |
| 109 | 10 | 5  | 3  | 2  | Bacteria(100);"Bacteroidetes"(100);"Bacteroidia"(70);"Bacteroidales"(70);unclassified(70);unclassified(70);                                      |
| 110 | 14 | 6  | 7  | 1  | Bacteria(100);Firmicutes(100);Clostridia(100);Clostridiales(100);unclassified(100);unclassified(100);                                            |
| 111 | 12 | 9  | 3  | 0  | Bacteria(100);Firmicutes(100);Clostridia(100);Clostridiales(100);Peptostreptococcaceae(100);Peptostreptococcaceae_incertae_sedis(100);           |
| 112 | 3  | 3  | 0  | 0  | Bacteria(100);"Fusobacteria"(100);"Fusobacteria"(100);"Fusobacteriales"(100);"Fusobacteriaceae"(100);unclassified(95);                           |
| 113 | 15 | 8  | 7  | 0  | Bacteria(100);Firmicutes(100);Clostridia(100);Clostridiales(100);Incertae_Sedis_XI(100);Murdochiella(100);                                       |
| 114 | 5  | 5  | 0  | 0  | Bacteria(100);"Bacteroidetes"(100);Flavobacteria(100);"Flavobacteriales"(100);Flavobacteriaceae(100);Capnocytophaga(100);                        |
| 115 | 8  | 8  | 0  | 0  | Bacteria(100);"Proteobacteria"(100);Epsilonproteobacteria(100);Campylobacteriales(100);Campylobacteraceae(100);Campylobacter(100);               |
| 116 | 18 | 8  | 1  | 9  | Bacteria(100);"Proteobacteria"(100);Betaproteobacteria(100);Burkholderiales(100);unclassified(100);unclassified(100);                            |
| 117 | 10 | 9  | 0  | 1  | Bacteria(100);"Proteobacteria"(100);Betaproteobacteria(100);Neisseriales(100);Neisseriaceae(100);Neisseria(100);                                 |



|     |     |    |    |    |                                                                                                                                                                                                                                                 |
|-----|-----|----|----|----|-------------------------------------------------------------------------------------------------------------------------------------------------------------------------------------------------------------------------------------------------|
| 118 | 8   | 4  | 4  | 0  | Bacteria(100);"Actinobacteria"(100);Actinobacteria(100);Actinomycetales(100);Corynebacteriaceae(52);Corynebacterium(52);                                                                                                                        |
| 119 | 7   | 7  | 0  | 0  | Bacteria(100);Firmicutes(100);Clostridia(100);Clostridiales(100);unclassified(79);unclassified(79);                                                                                                                                             |
| 120 | 13  | 6  | 2  | 5  | Bacteria(100);"Proteobacteria"(100);Gammaproteobacteria(100);Pseudomonadales(100);Pseudomonadaceae(100);unclassified;                                                                                                                           |
| 121 | 10  | 7  | 1  | 2  | Bacteria(100);"Proteobacteria"(100);Alphaproteobacteria(100);Caulobacterales(100);Caulobacteraceae(100);Brevundimonas(100);                                                                                                                     |
| 122 | 12  | 11 | 1  | 0  | Bacteria(100);"Proteobacteria"(100);Betaproteobacteria(100);Burkholderiales(100);Comamonadaceae(100);unclassified;<br>Bacteria(100);TM7(100);TM7_class_incertae_sedis(100);TM7_order_incertae_sedis(100);TM7_family_incertae_sedis(100);TM7_gen |
| 123 | 12  | 9  | 3  | 0  | us_incertae_sedis(100);                                                                                                                                                                                                                         |
| 124 | 6   | 6  | 0  | 0  | Bacteria(100);Firmicutes(100);Clostridia(100);Clostridiales(100);Lachnospiraceae(100);unclassified(100);<br>Bacteria(100);"Proteobacteria"(100);Alphaproteobacteria(100);Sphingomonadales(100);Sphingomonadaceae(100);Sphingomonas(1            |
| 125 | 10  | 6  | 1  | 3  | 00);                                                                                                                                                                                                                                            |
| 126 | 11  | 7  | 0  | 4  | Bacteria(100);Firmicutes(100);Negativicutes(100);Selenomonadales(100);Veillonellaceae(100);Negativicoccus(100);                                                                                                                                 |
| 127 | 8   | 4  | 4  | 0  | Bacteria(100);"Bacteroidetes"(100);"Bacteroidia"(100);"Bacteroidales"(100);"Porphyromonadaceae"(100);Tannerella(100);                                                                                                                           |
| 128 | 6   | 6  | 0  | 0  | Bacteria(100);Firmicutes(100);Clostridia(100);Clostridiales(100);Ruminococcaceae(100);Butyricoccus(100);                                                                                                                                        |
| 129 | 4   | 3  | 1  | 0  | Bacteria(100);"Actinobacteria"(100);Actinobacteria(100);Actinomycetales(100);Dermabacteraceae(100);Brachybacterium(100);                                                                                                                        |
| 130 | 11  | 10 | 1  | 0  | Bacteria(100);"Bacteroidetes"(100);"Bacteroidia"(100);"Bacteroidales"(100);"Porphyromonadaceae"(100);unclassified(86);                                                                                                                          |
| 131 | 8   | 8  | 0  | 0  | Bacteria(100);Firmicutes(100);Clostridia(100);Clostridiales(100);Clostridiales_Incertae_Sedis_XI(100);Anaerococcus(100);                                                                                                                        |
| 132 | 151 | 19 | 37 | 95 | Bacteria(100);"Proteobacteria"(100);Gammaproteobacteria(100);"Vibrionales"(100);Vibrionaceae(100);Vibrio(94);                                                                                                                                   |
| 133 | 8   | 8  | 0  | 0  | Bacteria(100);"Actinobacteria"(100);Actinobacteria(100);Actinomycetales(100);Corynebacteriaceae(100);Corynebacterium(95);                                                                                                                       |
| 134 | 2   | 2  | 0  | 0  | Bacteria(100);"Proteobacteria"(100);Alphaproteobacteria(100);Rhizobiales(100);Rhizobiaceae(100);Rhizobium(100);                                                                                                                                 |
| 135 | 4   | 2  | 2  | 0  | Bacteria(100);"Proteobacteria"(100);Gammaproteobacteria(100);Pseudomonadales(100);Moraxellaceae(100);Moraxella(100);                                                                                                                            |
| 136 | 5   | 5  | 0  | 0  | Bacteria(100);"Bacteroidetes"(100);unclassified(100);unclassified(100);unclassified(100);unclassified(100);                                                                                                                                     |
| 137 | 5   | 5  | 0  | 0  | Bacteria(100);Firmicutes(100);Clostridia(100);Clostridiales(100);Eubacteriaceae(100);Eubacterium(100);                                                                                                                                          |
| 138 | 9   | 9  | 0  | 0  | Bacteria(100);"Bacteroidetes"(82);unclassified(82);unclassified(82);unclassified(82);unclassified(82);                                                                                                                                          |
| 139 | 6   | 6  | 0  | 0  | Bacteria(100);"Bacteroidetes"(100);"Bacteroidia"(100);"Bacteroidales"(100);"Prevotellaceae"(100);Prevotella(100);                                                                                                                               |
| 140 | 14  | 10 | 4  | 0  | Bacteria(100);"Bacteroidetes"(100);"Bacteroidia"(100);"Bacteroidales"(100);"Prevotellaceae"(100);Prevotella(100);                                                                                                                               |
| 141 | 4   | 4  | 0  | 0  | Bacteria(100);"Actinobacteria"(100);Actinobacteria(100);Actinomycetales(100);Nocardiaceae(100);Gordonia(100);                                                                                                                                   |
| 142 | 6   | 6  | 0  | 0  | Bacteria(100);"Proteobacteria"(100);Betaproteobacteria(100);Neisseriales(100);Neisseriaceae(100);Neisseria(81);                                                                                                                                 |
| 143 | 6   | 6  | 0  | 0  | Bacteria(100);Firmicutes(100);Bacilli(100);Bacillales(100);Planococcaceae(100);unclassified(100);                                                                                                                                               |

|     |    |   |   |   |                                                                                                                                                                                                                                                     |
|-----|----|---|---|---|-----------------------------------------------------------------------------------------------------------------------------------------------------------------------------------------------------------------------------------------------------|
| 144 | 5  | 4 | 0 | 1 | Bacteria(100);"Actinobacteria"(100);Actinobacteria(100);Actinomycetales(100);Nocardioideaceae(100);unclassified(52);                                                                                                                                |
| 145 | 6  | 4 | 0 | 2 | Bacteria(100);"Proteobacteria"(100);Betaproteobacteria(100);Burkholderiales(100);Comamonadaceae(100);unclassified(57);<br>Bacteria(100);TM7(100);TM7_class_incertae_sedis(100);TM7_order_incertae_sedis(100);TM7_family_incertae_sedis(100);TM7_gen |
| 146 | 1  | 1 | 0 | 0 | us_incertae_sedis(100);                                                                                                                                                                                                                             |
| 147 | 5  | 5 | 0 | 0 | Bacteria(100);Firmicutes(100);Clostridia(100);Clostridiales(100);unclassified(100);unclassified(100);                                                                                                                                               |
| 148 | 2  | 2 | 0 | 0 | Bacteria(100);unclassified(100);unclassified(100);unclassified(100);unclassified(100);unclassified(100);                                                                                                                                            |
| 149 | 8  | 4 | 4 | 0 | Bacteria(100);Firmicutes(100);Clostridia(100);Clostridiales(100);Clostridiales_Incertae_Sedis_XI(100);Parvimonas(100);                                                                                                                              |
| 150 | 5  | 4 | 0 | 1 | Bacteria(100);"Bacteroidetes"(100);"Bacteroidia"(100);"Bacteroidales"(100);"Prevotellaceae"(100);Prevotella(100);                                                                                                                                   |
| 151 | 3  | 2 | 0 | 1 | Bacteria(100);"Bacteroidetes"(100);"Bacteroidia"(100);"Bacteroidales"(100);"Prevotellaceae"(67);unclassified(67);                                                                                                                                   |
| 152 | 1  | 1 | 0 | 0 | Bacteria(100);"Bacteroidetes"(100);"Sphingobacteria"(100);"Sphingobacteriales"(100);Sphingobacteriaceae(100);Pedobacter(100);                                                                                                                       |
| 153 | 6  | 6 | 0 | 0 | Bacteria(100);Firmicutes(100);Bacilli(100);Lactobacillales(100);Aerococcaceae(94);Facklamia(94);                                                                                                                                                    |
| 154 | 3  | 3 | 0 | 0 | Bacteria(100);"Bacteroidetes"(100);Flavobacteria(100);"Flavobacteriales"(100);Flavobacteriaceae(100);Chryseobacterium(94);                                                                                                                          |
| 155 | 2  | 2 | 0 | 0 | Bacteria(100);Firmicutes(91);unclassified;unclassified;unclassified;unclassified;                                                                                                                                                                   |
| 156 | 2  | 2 | 0 | 0 | Bacteria(100);Firmicutes(100);Negativicutes(100);Selenomonadales(100);Veillonellaceae(100);unclassified(100);                                                                                                                                       |
| 157 | 2  | 2 | 0 | 0 | Bacteria(100);"Proteobacteria"(100);Alphaproteobacteria(100);Rhizobiales(100);Hyphomicrobiaceae(100);Devosia(100);                                                                                                                                  |
| 158 | 6  | 4 | 2 | 0 | Bacteria(100);Firmicutes(100);Bacilli(100);Lactobacillales(100);Streptococcaceae(100);Streptococcus(100);                                                                                                                                           |
| 159 | 7  | 5 | 0 | 2 | Bacteria(100);Firmicutes(100);Bacilli(100);Lactobacillales(100);Lactobacillaceae(100);unclassified(70);                                                                                                                                             |
| 160 | 3  | 3 | 0 | 0 | Bacteria(100);Firmicutes(100);Clostridia(100);Clostridiales(100);Lachnospiraceae(100);Johnsonella(100);                                                                                                                                             |
| 161 | 9  | 7 | 0 | 2 | Bacteria(100);"Proteobacteria"(100);Alphaproteobacteria(100);Rhodobacterales(100);Rhodobacteraceae(100);Paracoccus(70);                                                                                                                             |
| 162 | 6  | 5 | 1 | 0 | Bacteria(100);Firmicutes(100);Bacilli(100);Bacillales(89);unclassified;unclassified;<br>Bacteria(100);"Bacteroidetes"(100);"Sphingobacteria"(100);"Sphingobacteriales"(100);Sphingobacteriaceae(100);Sphingobacterium(                              |
| 163 | 5  | 5 | 0 | 0 | 100);                                                                                                                                                                                                                                               |
| 164 | 7  | 7 | 0 | 0 | Bacteria(100);"Actinobacteria"(100);Actinobacteria(100);Actinomycetales(100);Geodermatophilaceae(100);Modestobacter(100);                                                                                                                           |
| 165 | 7  | 6 | 1 | 0 | Bacteria(100);"Actinobacteria"(100);Actinobacteria(100);Coriobacteriales(100);Coriobacteriaceae(100);Atopobium(100);                                                                                                                                |
| 166 | 6  | 6 | 0 | 0 | Bacteria(100);"Bacteroidetes"(100);unclassified(100);unclassified(100);unclassified(100);unclassified(100);<br>Bacteria(100);"Proteobacteria"(100);Gammaproteobacteria(100);Alteromonadales(100);Alteromonadaceae(100);Marinobacter(100)            |
| 167 | 2  | 2 | 0 | 0 | ;                                                                                                                                                                                                                                                   |
| 168 | 2  | 2 | 0 | 0 | Bacteria(100);"Fusobacteria"(100);"Fusobacteria"(100);"Fusobacteriales"(100);"Fusobacteriaceae"(100);Fusobacterium(100);                                                                                                                            |
| 169 | 11 | 6 | 1 | 4 | Bacteria(100);Firmicutes(100);Clostridia(100);Clostridiales(100);Lachnospiraceae(100);unclassified(100);                                                                                                                                            |
| 170 | 5  | 4 | 1 | 0 | Bacteria(100);"Bacteroidetes"(100);"Bacteroidia"(100);"Bacteroidales"(100);"Porphyromonadaceae"(100);Porphyromonas(100);                                                                                                                            |

|     |   |   |   |   |                                                                                                                                                                                                                                                       |
|-----|---|---|---|---|-------------------------------------------------------------------------------------------------------------------------------------------------------------------------------------------------------------------------------------------------------|
| 171 | 4 | 4 | 0 | 0 | Bacteria(100);"Actinobacteria"(100);Actinobacteria(100);Actinomycetales(100);Actinomycetaceae(100);Mobiluncus(100);<br>Bacteria(100);"Bacteroidetes"(100);"Sphingobacteria"(100);"Sphingobacteriales"(100);Chitinophagaceae(100);Sediminibacterium(10 |
| 172 | 4 | 4 | 0 | 0 | 0);                                                                                                                                                                                                                                                   |
| 173 | 7 | 3 | 1 | 3 | Bacteria(100);Firmicutes(100);Clostridia(100);Clostridiales(100);Clostridiaceae_1(100);Clostridium_sensu_stricto(83);                                                                                                                                 |
| 174 | 6 | 5 | 1 | 0 | Bacteria(100);"Bacteroidetes"(100);"Bacteroidia"(100);"Bacteroidales"(100);"Prevotellaceae"(100);Prevotella(100);                                                                                                                                     |
| 175 | 1 | 1 | 0 | 0 | Bacteria(100);Firmicutes(100);Bacilli(100);Lactobacillales(100);Carnobacteriaceae(92);Trichococcus(92);                                                                                                                                               |
| 176 | 2 | 2 | 0 | 0 | Bacteria(100);unclassified(100);unclassified(100);unclassified(100);unclassified(100);unclassified(100);                                                                                                                                              |
| 177 | 2 | 2 | 0 | 0 | Bacteria(100);"Bacteroidetes"(100);"Sphingobacteria"(100);"Sphingobacteriales"(100);Chitinophagaceae(100);unclassified(100);                                                                                                                          |
| 178 | 3 | 3 | 0 | 0 | Bacteria(100);"Bacteroidetes"(100);Flavobacteria(100);"Flavobacteriales"(100);Flavobacteriaceae(100);Epilithonimonas(100);                                                                                                                            |
| 179 | 4 | 4 | 0 | 0 | Bacteria(100);"Bacteroidetes"(100);"Bacteroidia"(100);"Bacteroidales"(100);"Prevotellaceae"(100);Prevotella(100);                                                                                                                                     |
| 180 | 3 | 3 | 0 | 0 | Bacteria(100);"Proteobacteria"(100);Gammaproteobacteria(100);Xanthomonadales(100);Xanthomonadaceae(100);unclassified(100);                                                                                                                            |
| 181 | 5 | 4 | 1 | 0 | Bacteria(100);Firmicutes(100);Negativicutes(100);Selenomonadales(100);Veillonellaceae(100);Selenomonas(100);                                                                                                                                          |
| 182 | 2 | 2 | 0 | 0 | Bacteria(100);"Fusobacteria"(100);"Fusobacteria"(100);"Fusobacteriales"(100);"Leptotrichiaceae"(100);Leptotrichia(100);                                                                                                                               |
| 183 | 2 | 2 | 0 | 0 | Bacteria(100);"Bacteroidetes"(100);"Bacteroidia"(100);"Bacteroidales"(100);"Prevotellaceae"(100);Prevotella(100);                                                                                                                                     |
| 184 | 4 | 3 | 0 | 1 | Bacteria(100);"Actinobacteria"(100);Actinobacteria(100);Actinomycetales(100);Geodermatophilaceae(100);Blastococcus(100);                                                                                                                              |
| 185 | 5 | 4 | 1 | 0 | Bacteria(100);"Actinobacteria"(100);Actinobacteria(100);Actinomycetales(100);Microbacteriaceae(100);unclassified(82);                                                                                                                                 |
| 186 | 6 | 6 | 0 | 0 | Bacteria(100);"Spirochaetes"(100);Spirochaetes(100);Spirochaetales(100);Spirochaetaceae(100);Treponema(100);<br>Bacteria(100);"Proteobacteria"(100);Alphaproteobacteria(100);Sphingomonadales(100);Sphingomonadaceae(100);Sphingomonas(1              |
| 187 | 3 | 3 | 0 | 0 | 00);                                                                                                                                                                                                                                                  |
| 188 | 3 | 3 | 0 | 0 | Bacteria(100);"Tenericutes"(100);Mollicutes(100);Mycoplasmatales(100);Mycoplasmataceae(100);Ureaplasma(100);                                                                                                                                          |
| 189 | 4 | 2 | 0 | 2 | Bacteria(100);"Actinobacteria"(100);Actinobacteria(100);Actinomycetales(100);Micrococcaceae(100);Kocuria(70);                                                                                                                                         |
| 190 | 2 | 2 | 0 | 0 | Bacteria(100);"Actinobacteria"(100);Actinobacteria(100);Coriobacteriales(100);Coriobacteriaceae(100);Collinsella(100);                                                                                                                                |
| 191 | 1 | 1 | 0 | 0 | Bacteria(100);"Proteobacteria"(100);Alphaproteobacteria(100);Rhizobiales(100);"Aurantimonadaceae"(100);Aurantimonas(100);                                                                                                                             |
| 192 | 3 | 3 | 0 | 0 | Bacteria(100);Firmicutes(100);Clostridia(100);Clostridiales(100);unclassified(100);unclassified(100);<br>Bacteria(100);"Proteobacteria"(100);Epsilonproteobacteria(100);Campylobacteriales(100);Campylobacteraceae(100);Campylobacter(                |
| 193 | 5 | 5 | 0 | 0 | 100);                                                                                                                                                                                                                                                 |
| 194 | 2 | 2 | 0 | 0 | Bacteria(100);"Actinobacteria"(100);Actinobacteria(100);Actinomycetales(100);Nocardioideaceae(100);Aeromicrobium(100);                                                                                                                                |
| 195 | 3 | 3 | 0 | 0 | Bacteria(100);Firmicutes(100);Clostridia(100);Clostridiales(100);Ruminococcaceae(100);unclassified(100);                                                                                                                                              |
| 196 | 6 | 6 | 0 | 0 | Bacteria(100);"Proteobacteria"(100);Betaproteobacteria(53);Burkholderiales(53);Comamonadaceae(53);Rhodoferax(53);                                                                                                                                     |

|     |    |    |   |   |                                                                                                                                                                                                                                                        |
|-----|----|----|---|---|--------------------------------------------------------------------------------------------------------------------------------------------------------------------------------------------------------------------------------------------------------|
| 197 | 5  | 5  | 0 | 0 | Bacteria(100);"Proteobacteria"(100);Alphaproteobacteria(100);Rhizobiales(100);Rhizobiaceae(56);unclassified(56);                                                                                                                                       |
| 198 | 3  | 2  | 1 | 0 | Bacteria(100);Firmicutes(100);Bacilli(100);Lactobacillales(100);Leuconostocaceae(100);Leuconostoc(100);                                                                                                                                                |
| 199 | 2  | 2  | 0 | 0 | Bacteria(100);Firmicutes(100);Clostridia(100);Clostridiales(100);Lachnospiraceae(100);Roseburia(100);                                                                                                                                                  |
| 200 | 1  | 1  | 0 | 0 | Bacteria(100);"Bacteroidetes"(100);"Bacteroidia"(100);"Bacteroidales"(100);"Porphyromonadaceae"(100);Tannerella(100);                                                                                                                                  |
| 201 | 1  | 1  | 0 | 0 | Bacteria(100);Firmicutes(100);Clostridia(100);Clostridiales(100);Lachnospiraceae(100);unclassified(100);                                                                                                                                               |
| 202 | 2  | 2  | 0 | 0 | Bacteria(100);"Actinobacteria"(100);Actinobacteria(100);Actinomycetales(100);Dietziaceae(100);Dietzia(100);                                                                                                                                            |
| 203 | 6  | 2  | 2 | 2 | Bacteria(100);Firmicutes(100);Clostridia(100);Clostridiales(100);Peptostreptococcaceae(100);Filifactor(100);                                                                                                                                           |
| 204 | 9  | 7  | 0 | 2 | Bacteria(100);"Bacteroidetes"(100);Flavobacteria(100);"Flavobacteriales"(100);Flavobacteriaceae(100);Flavobacterium(100);<br>Bacteria(100);TM7(100);TM7_class_incertae_sedis(100);TM7_order_incertae_sedis(100);TM7_family_incertae_sedis(100);TM7_gen |
| 205 | 1  | 1  | 0 | 0 | us_incertae_sedis(100);                                                                                                                                                                                                                                |
| 206 | 1  | 1  | 0 | 0 | Bacteria(100);"Actinobacteria"(100);Actinobacteria(100);Actinomycetales(100);Microbacteriaceae(100);unclassified(100);                                                                                                                                 |
| 207 | 1  | 1  | 0 | 0 | Bacteria(100);unclassified(100);unclassified(100);unclassified(100);unclassified(100);unclassified(100);                                                                                                                                               |
| 208 | 7  | 7  | 0 | 0 | Bacteria(100);"Proteobacteria"(100);Betaproteobacteria(100);Burkholderiales(100);Burkholderiaceae(100);Cupriavidus(100);                                                                                                                               |
| 209 | 9  | 7  | 0 | 2 | Bacteria(100);"Proteobacteria"(100);Gammaproteobacteria(100);Pseudomonadales(100);Pseudomonadaceae(100);Cellvibrio(100);                                                                                                                               |
| 210 | 2  | 2  | 0 | 0 | Bacteria(100);"Bacteroidetes"(100);"Sphingobacteria"(100);"Sphingobacteriales"(100);Chitinophagaceae(100);unclassified(100);                                                                                                                           |
| 211 | 2  | 2  | 0 | 0 | Bacteria(100);"Proteobacteria"(100);Betaproteobacteria(100);Burkholderiales(100);Burkholderiaceae(100);Ralstonia(100);                                                                                                                                 |
| 212 | 10 | 10 | 0 | 0 | Bacteria(100);"Proteobacteria"(100);Betaproteobacteria(100);Neisseriales(100);Neisseriaceae(100);Vogesella(100);                                                                                                                                       |
| 213 | 4  | 2  | 0 | 2 | Bacteria(100);Firmicutes(100);Bacilli(100);Lactobacillales(100);Lactobacillaceae(100);Lactobacillus(100);<br>Bacteria(100);"Proteobacteria"(100);Epsilonproteobacteria(100);Campylobacterales(100);Campylobacteraceae(100);Campylobacter(              |
| 214 | 3  | 3  | 0 | 0 | 100);                                                                                                                                                                                                                                                  |
| 215 | 3  | 2  | 1 | 0 | Bacteria(100);"Actinobacteria"(100);Actinobacteria(100);Actinomycetales(100);Dermacoccaceae(100);Kytococcus(100);                                                                                                                                      |
| 216 | 1  | 1  | 0 | 0 | Bacteria(100);"Tenericutes"(100);Mollicutes(100);Mycoplasmatales(100);Mycoplasmataceae(100);Mycoplasma(100);                                                                                                                                           |
| 217 | 1  | 1  | 0 | 0 | Bacteria(100);unclassified(100);unclassified(100);unclassified(100);unclassified(100);unclassified(100);                                                                                                                                               |
| 218 | 2  | 2  | 0 | 0 | Bacteria(100);"Actinobacteria"(100);Actinobacteria(100);Actinomycetales(100);Nocardiaceae(100);Rhodococcus(100);                                                                                                                                       |
| 219 | 2  | 2  | 0 | 0 | Bacteria(100);Firmicutes(100);Bacilli(100);Bacillales(100);Bacillaceae_1(84);unclassified;                                                                                                                                                             |
| 220 | 3  | 3  | 0 | 0 | Bacteria(100);"Actinobacteria"(100);Actinobacteria(100);Actinomycetales(100);Dermabacteraceae(100);Dermabacter(100);                                                                                                                                   |
| 221 | 1  | 1  | 0 | 0 | Bacteria(100);"Spirochaetes"(100);Spirochaetes(100);Spirochaetales(100);Spirochaetaceae(100);Treponema(100);                                                                                                                                           |
| 222 | 3  | 3  | 0 | 0 | Bacteria(100);"Bacteroidetes"(100);"Bacteroidia"(100);"Bacteroidales"(100);unclassified(86);unclassified(86);                                                                                                                                          |
| 223 | 3  | 1  | 2 | 0 | Bacteria(100);"Proteobacteria"(100);Gammaproteobacteria(100);Xanthomonadales(100);Xanthomonadaceae(100);Luteimonas(100);                                                                                                                               |

|     |    |   |   |   |                                                                                                                                                                                                                                                                 |
|-----|----|---|---|---|-----------------------------------------------------------------------------------------------------------------------------------------------------------------------------------------------------------------------------------------------------------------|
| 224 | 1  | 1 | 0 | 0 | Bacteria(100);Firmicutes(100);Bacilli(100);unclassified(84);unclassified(84);unclassified(84);                                                                                                                                                                  |
| 225 | 2  | 2 | 0 | 0 | Bacteria(100);"Proteobacteria"(100);Gammaproteobacteria(100);Xanthomonadales(100);Xanthomonadaceae(100);unclassified(100);                                                                                                                                      |
| 226 | 1  | 1 | 0 | 0 | Bacteria(100);"Proteobacteria"(100);Gammaproteobacteria(100);unclassified(100);unclassified(100);unclassified(100);                                                                                                                                             |
| 227 | 12 | 4 | 0 | 8 | Bacteria(100);"Bacteroidetes"(100);Flavobacteria(100);"Flavobacteriales"(100);Flavobacteriaceae(100);Cloacibacterium(100);                                                                                                                                      |
| 228 | 4  | 4 | 0 | 0 | Bacteria(100);"Actinobacteria"(100);Actinobacteria(100);Actinomycetales(100);Dietziaceae(100);Dietzia(100);                                                                                                                                                     |
| 229 | 1  | 1 | 0 | 0 | Bacteria(100);Firmicutes(100);Clostridia(100);Clostridiales(100);Lachnospiraceae(100);Blautia(100);                                                                                                                                                             |
| 230 | 1  | 1 | 0 | 0 | Bacteria(100);"Bacteroidetes"(100);"Sphingobacteria"(100);"Sphingobacteriales"(100);Chitinophagaceae(100);Segetibacter(100);                                                                                                                                    |
| 231 | 4  | 4 | 0 | 0 | Bacteria(100);"Proteobacteria"(100);Alphaproteobacteria(100);Rhizobiales(100);Methylobacteriaceae(100);Methylobacterium(100);<br>Bacteria(100);"Bacteroidetes"(100);"Sphingobacteria"(100);"Sphingobacteriales"(100);Sphingobacteriaceae(100);Sphingobacterium( |
| 232 | 1  | 1 | 0 | 0 | 100);                                                                                                                                                                                                                                                           |
| 233 | 5  | 4 | 1 | 0 | Bacteria(100);Firmicutes(100);Bacilli(100);Bacillales(100);Bacillales_Incertae_Sedis_XII(100);Exiguobacterium(100);                                                                                                                                             |
| 234 | 3  | 3 | 0 | 0 | Bacteria(100);"Deinococcus-Thermus"(100);Deinococci(100);Deinococcales(100);Deinococcaceae(100);Deinococcus(100);                                                                                                                                               |
| 235 | 2  | 2 | 0 | 0 | Bacteria(100);"Proteobacteria"(100);Betaproteobacteria(100);Burkholderiales(100);unclassified(67);unclassified(67);                                                                                                                                             |
| 236 | 4  | 4 | 0 | 0 | Bacteria(100);"Proteobacteria"(100);Gammaproteobacteria(100);Pseudomonadales(100);Moraxellaceae(100);unclassified(100);                                                                                                                                         |
| 237 | 2  | 2 | 0 | 0 | Bacteria(100);"Actinobacteria"(100);Actinobacteria(100);Actinomycetales(100);Actinomycetaceae(100);Varibaculum(100);<br>Bacteria(100);TM7(100);TM7_class_incertae_sedis(100);TM7_order_incertae_sedis(100);TM7_family_incertae_sedis(100);TM7_gen               |
| 238 | 2  | 2 | 0 | 0 | us_incertae_sedis(100);                                                                                                                                                                                                                                         |
| 239 | 2  | 2 | 0 | 0 | Bacteria(100);Firmicutes(100);Bacilli(100);Lactobacillales(100);unclassified(75);unclassified(75);                                                                                                                                                              |
| 240 | 2  | 2 | 0 | 0 | Bacteria(100);unclassified(100);unclassified(100);unclassified(100);unclassified(100);unclassified(100);                                                                                                                                                        |
| 241 | 8  | 2 | 3 | 3 | Bacteria(100);"Proteobacteria"(100);Gammaproteobacteria(100);Oceanospirillales(100);Oceanospirillaceae(100);Marinomonas(100);                                                                                                                                   |
| 242 | 2  | 2 | 0 | 0 | Bacteria(100);"Proteobacteria"(100);Gammaproteobacteria(100);Pseudomonadales(75);unclassified;unclassified;                                                                                                                                                     |
| 243 | 9  | 6 | 2 | 1 | Bacteria(100);"Actinobacteria"(100);Actinobacteria(100);Actinomycetales(100);Actinomycetaceae(100);Actinomyces(100);                                                                                                                                            |
| 244 | 3  | 3 | 0 | 0 | Bacteria(100);"Proteobacteria"(100);Alphaproteobacteria(100);Caulobacteriales(100);Caulobacteraceae(100);Brevundimonas(100);                                                                                                                                    |
| 245 | 3  | 3 | 0 | 0 | Bacteria(100);"Actinobacteria"(100);Actinobacteria(100);Actinomycetales(100);Micrococcaceae(100);Arthrobacter(88);                                                                                                                                              |
| 246 | 1  | 1 | 0 | 0 | Bacteria(100);Firmicutes(100);Clostridia(100);Clostridiales(100);Lachnospiraceae(100);unclassified(100);                                                                                                                                                        |
| 247 | 1  | 1 | 0 | 0 | Bacteria(100);"Bacteroidetes"(100);"Bacteroidia"(100);"Bacteroidales"(100);"Prevotellaceae"(100);Prevotella(100);                                                                                                                                               |
| 248 | 3  | 3 | 0 | 0 | Bacteria(100);"Deinococcus-Thermus"(100);Deinococci(100);Thermales(100);Thermaceae(100);Thermus(100);                                                                                                                                                           |
| 249 | 1  | 1 | 0 | 0 | Bacteria(100);"Bacteroidetes"(100);"Sphingobacteria"(100);"Sphingobacteriales"(100);Chitinophagaceae(100);unclassified(100);                                                                                                                                    |

|     |   |   |   |   |                                                                                                                                                                                                                                                      |
|-----|---|---|---|---|------------------------------------------------------------------------------------------------------------------------------------------------------------------------------------------------------------------------------------------------------|
| 250 | 1 | 1 | 0 | 0 | Bacteria(100);unclassified(100);unclassified(100);unclassified(100);unclassified(100);unclassified(100);                                                                                                                                             |
| 251 | 1 | 1 | 0 | 0 | Bacteria(100);Firmicutes(100);Bacilli(67);Bacillales(67);unclassified(67);unclassified(67);                                                                                                                                                          |
| 252 | 2 | 2 | 0 | 0 | Bacteria(100);Firmicutes(100);Negativicutes(100);Selenomonadales(100);Veillonellaceae(100);Selenomonas(100);                                                                                                                                         |
| 253 | 6 | 6 | 0 | 0 | Bacteria(100);"Actinobacteria"(100);Actinobacteria(100);Actinomycetales(100);Corynebacteriaceae(100);Corynebacterium(100);<br>Bacteria(100);"Proteobacteria"(100);Gammaproteobacteria(100);Xanthomonadales(100);Xanthomonadaceae(100);Pseudoxanthomo |
| 254 | 2 | 2 | 0 | 0 | nas(100);                                                                                                                                                                                                                                            |
| 255 | 1 | 1 | 0 | 0 | Bacteria(100);Firmicutes(100);Clostridia(100);Clostridiales(100);Lachnospiraceae(100);unclassified(100);                                                                                                                                             |
| 256 | 1 | 1 | 0 | 0 | Bacteria(100);"Spirochaetes"(100);Spirochaetes(100);Spirochaetales(100);Spirochaetaceae(100);Treponema(100);                                                                                                                                         |
| 257 | 1 | 1 | 0 | 0 | Bacteria(100);Firmicutes(100);Bacilli(100);Bacillales(100);Staphylococcaceae(100);unclassified(100);                                                                                                                                                 |
| 258 | 1 | 1 | 0 | 0 | Bacteria(100);"Actinobacteria"(100);Actinobacteria(100);Actinomycetales(100);Nocardiaceae(100);Rhodococcus(86);                                                                                                                                      |
| 259 | 3 | 3 | 0 | 0 | Bacteria(100);"Fusobacteria"(100);"Fusobacteria"(100);"Fusobacteriales"(100);"Leptotrichiaceae"(100);Leptotrichia(72);                                                                                                                               |
| 260 | 2 | 2 | 0 | 0 | Bacteria(100);"Proteobacteria"(100);Betaproteobacteria(100);Burkholderiales(100);Comamonadaceae(100);unclassified(100);                                                                                                                              |
| 261 | 2 | 2 | 0 | 0 | Bacteria(100);"Actinobacteria"(100);Actinobacteria(100);Actinomycetales(100);Brevibacteriaceae(100);Brevibacterium(100);                                                                                                                             |
| 262 | 1 | 1 | 0 | 0 | Bacteria(100);"Actinobacteria"(100);Actinobacteria(100);Actinomycetales(100);Corynebacteriaceae(67);unclassified;                                                                                                                                    |
| 263 | 1 | 1 | 0 | 0 | Bacteria(100);Firmicutes(100);Clostridia(100);Clostridiales(100);Clostridiales_Incertae_Sedis_XIII(100);Mogibacterium(100);                                                                                                                          |
| 264 | 1 | 1 | 0 | 0 | Bacteria(100);Firmicutes(100);Clostridia(100);Clostridiales(100);Clostridiaceae_1(100);unclassified(100);                                                                                                                                            |
| 265 | 1 | 1 | 0 | 0 | Bacteria(100);unclassified(100);unclassified(100);unclassified(100);unclassified(100);unclassified(100);                                                                                                                                             |
| 266 | 2 | 2 | 0 | 0 | Bacteria(100);"Actinobacteria"(100);Actinobacteria(100);unclassified(100);unclassified(100);unclassified(100);                                                                                                                                       |
| 267 | 3 | 3 | 0 | 0 | Bacteria(100);"Proteobacteria"(100);Betaproteobacteria(100);Burkholderiales(100);Burkholderiaceae(100);Chitinimonas(100);                                                                                                                            |
| 268 | 1 | 1 | 0 | 0 | Bacteria(100);unclassified(100);unclassified(100);unclassified(100);unclassified(100);unclassified(100);<br>Bacteria(100);"Proteobacteria"(100);Alphaproteobacteria(100);Sphingomonadales(100);Sphingomonadaceae(100);Sphingomonas(1                 |
| 269 | 2 | 2 | 0 | 0 | 00);                                                                                                                                                                                                                                                 |
| 270 | 1 | 1 | 0 | 0 | Bacteria(100);"Actinobacteria"(100);Actinobacteria(100);Actinomycetales(100);Propionibacteriaceae(100);Propionibacterium(100);                                                                                                                       |
| 271 | 1 | 1 | 0 | 0 | Bacteria(100);Firmicutes(100);Clostridia(100);Clostridiales(100);Lachnospiraceae(100);unclassified(100);                                                                                                                                             |
| 272 | 2 | 2 | 0 | 0 | Bacteria(100);"Proteobacteria"(100);Gammaproteobacteria(100);Pseudomonadales(100);Moraxellaceae(100);Psychrobacter(100);                                                                                                                             |
| 273 | 2 | 0 | 2 | 0 | Bacteria(100);"Proteobacteria"(100);Alphaproteobacteria(100);Rhizobiales(100);Bradyrhizobiaceae(100);Bradyrhizobium(67);                                                                                                                             |
| 274 | 2 | 2 | 0 | 0 | Bacteria(100);"Proteobacteria"(100);Alphaproteobacteria(100);Caulobacterales(100);Caulobacteraceae(100);unclassified(100);                                                                                                                           |
| 275 | 1 | 1 | 0 | 0 | Bacteria(100);"Proteobacteria"(100);Alphaproteobacteria(100);Rhodobacterales(100);Rhodobacteraceae(100);unclassified(100);                                                                                                                           |

|     |   |   |   |   |                                                                                                                                                                                                                                                        |
|-----|---|---|---|---|--------------------------------------------------------------------------------------------------------------------------------------------------------------------------------------------------------------------------------------------------------|
| 276 | 2 | 2 | 0 | 0 | Bacteria(100);"Proteobacteria"(100);Alphaproteobacteria(100);Rhizobiales(100);Methylobacteriaceae(100);Methylobacterium(100);                                                                                                                          |
| 277 | 4 | 4 | 0 | 0 | Bacteria(100);"Bacteroidetes"(100);"Bacteroidia"(100);"Bacteroidales"(100);"Prevotellaceae"(100);Prevotella(100);                                                                                                                                      |
| 278 | 2 | 2 | 0 | 0 | Bacteria(100);"Actinobacteria"(100);Actinobacteria(100);Actinomycetales(100);Microbacteriaceae(100);Fronidhabitans(100);                                                                                                                               |
| 279 | 3 | 3 | 0 | 0 | Bacteria(100);"Bacteroidetes"(100);"Bacteroidia"(100);"Bacteroidales"(100);"Prevotellaceae"(100);Prevotella(80);                                                                                                                                       |
| 280 | 1 | 1 | 0 | 0 | Bacteria(100);"Bacteroidetes"(100);unclassified(58);unclassified(58);unclassified(58);unclassified(58);                                                                                                                                                |
| 281 | 1 | 1 | 0 | 0 | Bacteria(100);"Actinobacteria"(100);Actinobacteria(100);Actinomycetales(100);Nocardiodaceae(100);Nocardioides(100);<br>Bacteria(100);"Acidobacteria"(100);Acidobacteria_Gp6(100);Acidobacteria_Gp6_order_incertae_sedis(100);Acidobacteria_Gp6_fami    |
| 282 | 2 | 2 | 0 | 0 | ly_incertae_sedis(100);Gp6(100);                                                                                                                                                                                                                       |
| 283 | 1 | 1 | 0 | 0 | Bacteria(100);Firmicutes(100);Clostridia(100);Clostridiales(100);Lachnospiraceae(100);Catonella(100);                                                                                                                                                  |
| 284 | 2 | 2 | 0 | 0 | Bacteria(100);"Bacteroidetes"(100);Flavobacteria(100);"Flavobacteriales"(100);Flavobacteriaceae(100);Capnocytophaga(100);                                                                                                                              |
| 285 | 3 | 3 | 0 | 0 | Bacteria(100);Firmicutes(100);Bacilli(100);Bacillales(100);Paenibacillaceae_1(100);Paenibacillus(67);                                                                                                                                                  |
| 286 | 1 | 1 | 0 | 0 | Bacteria(100);"Bacteroidetes"(100);Flavobacteria(100);"Flavobacteriales"(100);Flavobacteriaceae(100);Flavobacterium(100);                                                                                                                              |
| 287 | 2 | 2 | 0 | 0 | Bacteria(100);unclassified(100);unclassified(100);unclassified(100);unclassified(100);unclassified(100);                                                                                                                                               |
| 288 | 1 | 1 | 0 | 0 | Bacteria(100);"Bacteroidetes"(100);"Bacteroidia"(100);"Bacteroidales"(100);Bacteroidaceae(100);Bacteroides(100);                                                                                                                                       |
| 289 | 1 | 0 | 0 | 1 | Bacteria(100);"Actinobacteria"(100);Actinobacteria(100);Actinomycetales(100);Propionibacteriaceae(100);unclassified(100);                                                                                                                              |
| 290 | 2 | 1 | 1 | 0 | Bacteria(100);unclassified(100);unclassified(100);unclassified(100);unclassified(100);unclassified(100);                                                                                                                                               |
| 291 | 1 | 1 | 0 | 0 | Bacteria(100);"Proteobacteria"(100);Alphaproteobacteria(100);unclassified(100);unclassified(100);unclassified(100);                                                                                                                                    |
| 292 | 4 | 4 | 0 | 0 | Bacteria(100);"Actinobacteria"(100);Actinobacteria(100);Actinomycetales(100);unclassified(100);unclassified(100);                                                                                                                                      |
| 293 | 2 | 2 | 0 | 0 | Bacteria(100);"Proteobacteria"(100);Betaproteobacteria(100);Neisseriales(75);Neisseriaceae(75);unclassified(75);                                                                                                                                       |
| 294 | 5 | 5 | 0 | 0 | Bacteria(100);"Actinobacteria"(100);Actinobacteria(100);Actinomycetales(100);Intrasporangiaceae(100);Phycoccus(100);                                                                                                                                   |
| 295 | 6 | 3 | 0 | 3 | Bacteria(100);Firmicutes(100);Clostridia(100);Clostridiales(100);Clostridiales_Incertae_Sedis_XI(100);Anaerococcus(100);                                                                                                                               |
| 296 | 1 | 1 | 0 | 0 | Bacteria(100);unclassified(100);unclassified(100);unclassified(100);unclassified(100);unclassified(100);                                                                                                                                               |
| 297 | 1 | 1 | 0 | 0 | Bacteria(100);Firmicutes(100);Erysipelotrichia(100);Erysipelotrichales(100);Erysipelotrichaceae(100);Solobacterium(100);<br>Bacteria(100);"Proteobacteria"(100);Alphaproteobacteria(100);Sphingomonadales(100);Sphingomonadaceae(100);Sphingopyxis(100 |
| 298 | 2 | 2 | 0 | 0 | );                                                                                                                                                                                                                                                     |
| 299 | 2 | 2 | 0 | 0 | Bacteria(100);"Proteobacteria"(100);Betaproteobacteria(100);Burkholderiales(100);Oxalobacteraceae(100);unclassified(58);                                                                                                                               |
| 300 | 1 | 1 | 0 | 0 | Bacteria(100);"Actinobacteria"(100);Actinobacteria(100);Actinomycetales(100);Corynebacteriaceae(100);Corynebacterium(100);                                                                                                                             |
| 301 | 2 | 2 | 0 | 0 | Bacteria(100);"Bacteroidetes"(100);"Bacteroidia"(100);"Bacteroidales"(100);"Prevotellaceae"(100);Prevotella(100);                                                                                                                                      |

|     |   |   |   |   |                                                                                                                            |
|-----|---|---|---|---|----------------------------------------------------------------------------------------------------------------------------|
| 302 | 1 | 1 | 0 | 0 | Bacteria(100);OD1(100);OD1_class_incertae_sedis(100);OD1_order_incertae_sedis(100);OD1_family_incertae_sedis(100);OD1_genu |
| 303 | 1 | 1 | 0 | 0 | s_incertae_sedis(100);                                                                                                     |
| 304 | 1 | 1 | 0 | 0 | Bacteria(100);Firmicutes(100);Bacilli(100);Lactobacillales(100);Streptococcaceae(100);Streptococcus(100);                  |
| 305 | 1 | 1 | 0 | 0 | Bacteria(100);Firmicutes(100);Bacilli(100);Bacillales(100);unclassified(100);unclassified(100);                            |
| 306 | 2 | 2 | 0 | 0 | Bacteria(100);Firmicutes(100);Clostridia(100);Clostridiales(100);Lachnospiraceae(100);Blautia(100);                        |
| 307 | 1 | 1 | 0 | 0 | Bacteria(100);unclassified(100);unclassified(100);unclassified(100);unclassified(100);unclassified(100);                   |
| 308 | 1 | 1 | 0 | 0 | Bacteria(100);"Actinobacteria"(100);Actinobacteria(100);Actinomycetales(100);unclassified(67);unclassified(67);            |
| 309 | 2 | 2 | 0 | 0 | Bacteria(100);"Proteobacteria"(100);Alphaproteobacteria(100);Sphingomonadales(100);Sphingomonadaceae(100);unclassified;    |
| 310 | 1 | 1 | 0 | 0 | Bacteria(100);"Chloroflexi"(100);Thermomicrobia(100);Sphaerobacterales(67);Sphaerobacteraceae(67);Sphaerobacter(67);       |
| 311 | 2 | 2 | 0 | 0 | Bacteria(100);"Proteobacteria"(100);Gammaproteobacteria(100);Pasteurellales(100);Pasteurellaceae(100);unclassified(100);   |
| 312 | 1 | 1 | 0 | 0 | Bacteria(100);"Proteobacteria"(100);Deltaproteobacteria(100);unclassified(100);unclassified(100);unclassified(100);        |
| 313 | 2 | 2 | 0 | 0 | Bacteria(100);"Proteobacteria"(100);Alphaproteobacteria(100);Rhizobiales(100);unclassified;unclassified;                   |
| 314 | 1 | 1 | 0 | 0 | Bacteria(100);"Actinobacteria"(100);Actinobacteria(100);Actinomycetales(100);unclassified(100);unclassified(100);          |
| 315 | 1 | 1 | 0 | 0 | Bacteria(100);"Proteobacteria"(100);Alphaproteobacteria(100);Caulobacterales(100);Caulobacteraceae(100);Caulobacter(100);  |
| 316 | 2 | 2 | 0 | 0 | Bacteria(100);Firmicutes(100);Negativicutes(100);Selenomonadales(100);Veillonellaceae(100);Dialister(100);                 |
| 317 | 1 | 1 | 0 | 0 | Bacteria(100);unclassified(100);unclassified(100);unclassified(100);unclassified(100);unclassified(100);                   |
| 318 | 2 | 2 | 0 | 0 | Bacteria(100);"Bacteroidetes"(100);"Bacteroidia"(100);"Bacteroidales"(100);"Porphyromonadaceae"(100);Porphyromonas(100);   |
| 319 | 2 | 2 | 0 | 0 | Bacteria(100);"Proteobacteria"(100);Alphaproteobacteria(100);Rhizobiales(100);Brucellaceae(100);Ochrobactrum(100);         |
| 320 | 3 | 3 | 0 | 0 | Bacteria(100);"Actinobacteria"(100);Actinobacteria(100);Coriobacteriales(100);Coriobacteriaceae(100);Olsenella(100);       |
| 321 | 1 | 1 | 0 | 0 | Bacteria(100);"Bacteroidetes"(100);Flavobacteria(100);"Flavobacteriales"(100);Flavobacteriaceae(100);unclassified(100);    |
| 322 | 2 | 2 | 0 | 0 | Bacteria(100);"Proteobacteria"(100);Gammaproteobacteria(100);Pseudomonadales(100);Moraxellaceae(100);Acinetobacter(100);   |
| 323 | 2 | 2 | 0 | 0 | Bacteria(100);Firmicutes(100);Clostridia(100);Clostridiales(100);Lachnospiraceae(100);Blautia(100);                        |
| 324 | 1 | 1 | 0 | 0 | Bacteria(100);Firmicutes(100);Bacilli(100);Lactobacillales(100);Carnobacteriaceae(100);unclassified(67);                   |
| 325 | 1 | 1 | 0 | 0 | Bacteria(100);"Verrucomicrobia"(100);Verrucomicrobiae(100);Verrucomicrobiales(100);Verrucomicrobiaceae(100);unclassified;  |
| 326 | 3 | 2 | 1 | 0 | Bacteria(100);Firmicutes(100);Clostridia(100);Clostridiales(100);Ruminococcaceae(100);unclassified(100);                   |
| 327 | 3 | 2 | 1 | 0 | Bacteria(100);"Bacteroidetes"(100);"Bacteroidia"(100);"Bacteroidales"(100);"Prevotellaceae"(100);Prevotella(100);          |
| 328 | 4 | 4 | 0 | 0 | Bacteria(100);Firmicutes(100);Clostridia(100);Clostridiales(100);unclassified(100);unclassified(100);                      |
|     |   |   |   |   | Bacteria(100);"Proteobacteria"(100);Betaproteobacteria(100);Burkholderiales(100);Oxalobacteraceae(100);unclassified(100);  |



|     |   |   |   |   |                                                                                                                                                                                                                                                  |
|-----|---|---|---|---|--------------------------------------------------------------------------------------------------------------------------------------------------------------------------------------------------------------------------------------------------|
| 329 | 1 | 1 | 0 | 0 | Bacteria(100);"Proteobacteria"(100);Betaproteobacteria(100);Burkholderiales(100);Oxalobacteraceae(100);unclassified;<br>Bacteria(100);"Proteobacteria"(100);Alphaproteobacteria(100);Sphingomonadales(100);Sphingomonadaceae(100);Novosphingobiu |
| 330 | 1 | 1 | 0 | 0 | m(100);                                                                                                                                                                                                                                          |
| 331 | 1 | 1 | 0 | 0 | Bacteria(100);"Proteobacteria"(100);Betaproteobacteria(100);unclassified(100);unclassified(100);unclassified(100);                                                                                                                               |
| 332 | 3 | 3 | 0 | 0 | Bacteria(100);unclassified(60);unclassified(60);unclassified(60);unclassified(60);unclassified(60);                                                                                                                                              |
| 333 | 1 | 1 | 0 | 0 | Bacteria(100);"Bacteroidetes"(100);unclassified(100);unclassified(100);unclassified(100);unclassified(100);                                                                                                                                      |
| 334 | 1 | 1 | 0 | 0 | Bacteria(100);"Proteobacteria"(100);Gammaproteobacteria(100);Pseudomonadales(100);Moraxellaceae(100);Alkanindiges(100);                                                                                                                          |
| 335 | 2 | 2 | 0 | 0 | Bacteria(100);"Bacteroidetes"(100);"Bacteroidia"(100);"Bacteroidales"(100);"Prevotellaceae"(100);Prevotella(100);                                                                                                                                |
| 336 | 1 | 1 | 0 | 0 | Bacteria(100);"Bacteroidetes"(100);"Sphingobacteria"(100);"Sphingobacteriales"(100);Cytophagaceae(100);Arcicella(100);                                                                                                                           |
| 337 | 1 | 1 | 0 | 0 | Bacteria(100);"Actinobacteria"(100);Actinobacteria(100);Actinomycetales(100);unclassified(100);unclassified(100);                                                                                                                                |
| 338 | 1 | 1 | 0 | 0 | Bacteria(100);"Actinobacteria"(100);Actinobacteria(100);Actinomycetales(100);unclassified;unclassified;                                                                                                                                          |
| 339 | 2 | 2 | 0 | 0 | Bacteria(100);unclassified(100);unclassified(100);unclassified(100);unclassified(100);unclassified(100);                                                                                                                                         |
| 340 | 4 | 4 | 0 | 0 | Bacteria(100);"Proteobacteria"(100);unclassified(100);unclassified(100);unclassified(100);unclassified(100);                                                                                                                                     |
| 341 | 1 | 1 | 0 | 0 | Bacteria(100);"Proteobacteria"(100);unclassified(100);unclassified(100);unclassified(100);unclassified(100);                                                                                                                                     |
| 342 | 1 | 1 | 0 | 0 | Bacteria(100);unclassified(100);unclassified(100);unclassified(100);unclassified(100);unclassified(100);                                                                                                                                         |
| 343 | 1 | 1 | 0 | 0 | Bacteria(100);Firmicutes(100);Bacilli(100);unclassified(100);unclassified(100);unclassified(100);                                                                                                                                                |
| 344 | 1 | 1 | 0 | 0 | Bacteria(100);"Proteobacteria"(100);Deltaproteobacteria(100);Bdellovibrionales(100);Bacteriovoracaceae(100);Peredibacter(100);                                                                                                                   |
| 345 | 2 | 2 | 0 | 0 | Bacteria(100);Firmicutes(100);Bacilli(100);Lactobacillales(100);Streptococcaceae(100);Streptococcus(100);                                                                                                                                        |
| 346 | 1 | 1 | 0 | 0 | Bacteria(100);Firmicutes(100);Clostridia(100);Clostridiales(100);Lachnospiraceae(100);unclassified(100);                                                                                                                                         |
| 347 | 3 | 3 | 0 | 0 | Bacteria(100);"Actinobacteria"(100);Actinobacteria(100);Actinomycetales(100);Brevibacteriaceae(100);Brevibacterium(100);                                                                                                                         |
| 348 | 1 | 1 | 0 | 0 | Bacteria(100);"Bacteroidetes"(100);unclassified(100);unclassified(100);unclassified(100);unclassified(100);                                                                                                                                      |
| 349 | 1 | 1 | 0 | 0 | Bacteria(100);"Deinococcus-Thermus"(100);Deinococci(100);Deinococcales(100);Deinococcaceae(100);Deinococcus(100);                                                                                                                                |
| 350 | 2 | 2 | 0 | 0 | Bacteria(100);"Actinobacteria"(100);Actinobacteria(100);Coriobacteriales(100);Coriobacteriaceae(100);Olsenella(100);                                                                                                                             |
| 351 | 2 | 2 | 0 | 0 | Bacteria(100);"Proteobacteria"(100);Alphaproteobacteria(100);unclassified(100);unclassified(100);unclassified(100);                                                                                                                              |
| 352 | 1 | 1 | 0 | 0 | Bacteria(100);unclassified(100);unclassified(100);unclassified(100);unclassified(100);unclassified(100);                                                                                                                                         |
| 353 | 1 | 1 | 0 | 0 | Bacteria(100);Firmicutes(100);Negativicutes(100);Selenomonadales(100);Veillonellaceae(100);Veillonella(100);<br>Bacteria(100);"Proteobacteria"(100);Epsilonproteobacteria(100);Campylobacterales(100);Campylobacteraceae(100);Arcobacter(100)    |
| 354 | 1 | 1 | 0 | 0 | ;                                                                                                                                                                                                                                                |
| 355 | 3 | 3 | 0 | 0 | Bacteria(100);"Proteobacteria"(100);Alphaproteobacteria(100);Rhizobiales(100);Hyphomicrobiaceae(100);unclassified(100);                                                                                                                          |
| 356 | 1 | 1 | 0 | 0 | Bacteria(100);Firmicutes(100);Bacilli(100);Lactobacillales(100);Carnobacteriaceae(100);Atopostipes(100);                                                                                                                                         |
| 357 | 1 | 1 | 0 | 0 | Bacteria(100);unclassified(100);unclassified(100);unclassified(100);unclassified(100);unclassified(100);                                                                                                                                         |

|     |   |   |   |   |                                                                                                                                                                                                                                                       |
|-----|---|---|---|---|-------------------------------------------------------------------------------------------------------------------------------------------------------------------------------------------------------------------------------------------------------|
| 358 | 1 | 1 | 0 | 0 | Bacteria(100);"Actinobacteria"(100);Actinobacteria(100);Actinomycetales(100);unclassified;unclassified;                                                                                                                                               |
| 359 | 1 | 1 | 0 | 0 | Bacteria(100);Firmicutes(100);Clostridia(100);Clostridiales(100);Lachnospiraceae(100);Clostridium_XIVb(100);                                                                                                                                          |
| 360 | 1 | 1 | 0 | 0 | Bacteria(100);unclassified(67);unclassified(67);unclassified(67);unclassified(67);unclassified(67);                                                                                                                                                   |
| 361 | 1 | 1 | 0 | 0 | Bacteria(100);unclassified(100);unclassified(100);unclassified(100);unclassified(100);unclassified(100);                                                                                                                                              |
| 362 | 1 | 1 | 0 | 0 | Bacteria(100);Firmicutes(100);Bacilli(100);Lactobacillales(100);Lactobacillaceae(100);Lactobacillus(100);                                                                                                                                             |
| 363 | 1 | 1 | 0 | 0 | Bacteria(100);"Proteobacteria"(100);Betaproteobacteria(100);Burkholderiales(100);unclassified(100);unclassified(100);<br>Bacteria(100);"Gemmatimonadetes"(100);Gemmatimonadetes(100);Gemmatimonadales(100);Gemmatimonadaceae(100);Gemmati             |
| 364 | 1 | 1 | 0 | 0 | monas(100);                                                                                                                                                                                                                                           |
| 365 | 1 | 1 | 0 | 0 | Bacteria(100);"Proteobacteria"(100);Betaproteobacteria(100);Burkholderiales(100);Oxalobacteraceae(100);unclassified(100);                                                                                                                             |
| 366 | 1 | 1 | 0 | 0 | Bacteria(100);"Actinobacteria"(100);Actinobacteria(100);Actinomycetales(100);Propionibacteriaceae(100);Propioniferax(100);                                                                                                                            |
| 367 | 1 | 1 | 0 | 0 | Bacteria(100);unclassified(100);unclassified(100);unclassified(100);unclassified(100);unclassified(100);                                                                                                                                              |
| 368 | 1 | 1 | 0 | 0 | Bacteria(100);unclassified(100);unclassified(100);unclassified(100);unclassified(100);unclassified(100);                                                                                                                                              |
| 369 | 1 | 1 | 0 | 0 | Bacteria(100);"Proteobacteria"(100);Alphaproteobacteria(100);unclassified(100);unclassified(100);unclassified(100);<br>Bacteria(100);"Proteobacteria"(100);Gammaproteobacteria(100);"Enterobacteriales"(100);Enterobacteriaceae(100);unclassified(100 |
| 370 | 1 | 1 | 0 | 0 | );                                                                                                                                                                                                                                                    |
| 371 | 1 | 1 | 0 | 0 | Bacteria(100);unclassified(100);unclassified(100);unclassified(100);unclassified(100);unclassified(100);                                                                                                                                              |
| 372 | 1 | 1 | 0 | 0 | Bacteria(100);"Bacteroidetes"(100);"Bacteroidia"(100);"Bacteroidales"(100);"Prevotellaceae"(100);Prevotella(100);                                                                                                                                     |
| 373 | 1 | 1 | 0 | 0 | Bacteria(100);Firmicutes(100);Bacilli(100);Lactobacillales(100);unclassified(100);unclassified(100);                                                                                                                                                  |
| 374 | 1 | 1 | 0 | 0 | Bacteria(100);unclassified(100);unclassified(100);unclassified(100);unclassified(100);unclassified(100);                                                                                                                                              |
| 375 | 1 | 1 | 0 | 0 | Bacteria(100);unclassified(100);unclassified(100);unclassified(100);unclassified(100);unclassified(100);                                                                                                                                              |
| 376 | 1 | 1 | 0 | 0 | Bacteria(100);Firmicutes(100);Bacilli(100);Lactobacillales(100);unclassified(100);unclassified(100);                                                                                                                                                  |
| 377 | 1 | 1 | 0 | 0 | Bacteria(100);"Bacteroidetes"(100);"Bacteroidia"(100);"Bacteroidales"(100);unclassified(100);unclassified(100);                                                                                                                                       |
| 378 | 1 | 1 | 0 | 0 | Bacteria(100);unclassified(100);unclassified(100);unclassified(100);unclassified(100);unclassified(100);                                                                                                                                              |
| 379 | 1 | 1 | 0 | 0 | Bacteria(100);unclassified(100);unclassified(100);unclassified(100);unclassified(100);unclassified(100);                                                                                                                                              |
| 380 | 1 | 1 | 0 | 0 | Bacteria(100);"Proteobacteria"(100);Gammaproteobacteria(100);Pasteurellales(100);Pasteurellaceae(100);Mannheimia(100);                                                                                                                                |
| 381 | 1 | 1 | 0 | 0 | Bacteria(100);"Fusobacteria"(100);"Fusobacteria"(100);"Fusobacteriales"(100);"Fusobacteriaceae"(100);Fusobacterium(100);                                                                                                                              |
| 382 | 1 | 1 | 0 | 0 | Bacteria(100);unclassified(100);unclassified(100);unclassified(100);unclassified(100);unclassified(100);<br>Bacteria(100);TM7(100);TM7_class_incertae_sedis(100);TM7_order_incertae_sedis(100);TM7_family_incertae_sedis(100);TM7_gen                 |
| 383 | 1 | 1 | 0 | 0 | us_incertae_sedis(100);                                                                                                                                                                                                                               |
| 384 | 1 | 1 | 0 | 0 | Bacteria(100);Firmicutes(100);Bacilli(100);Lactobacillales(100);Streptococcaceae(100);Streptococcus(100);                                                                                                                                             |
| 385 | 1 | 1 | 0 | 0 | Bacteria(100);Firmicutes(100);Negativicutes(100);Selenomonadales(100);Veillonellaceae(100);unclassified(100);                                                                                                                                         |
| 386 | 1 | 1 | 0 | 0 | Bacteria(100);Firmicutes(100);Bacilli(100);Lactobacillales(100);Streptococcaceae(100);Streptococcus(100);                                                                                                                                             |

|     |   |   |   |   |                                                                                                                                                                                                                                                                 |
|-----|---|---|---|---|-----------------------------------------------------------------------------------------------------------------------------------------------------------------------------------------------------------------------------------------------------------------|
| 387 | 1 | 1 | 0 | 0 | Bacteria(100);"Actinobacteria"(100);Actinobacteria(100);Actinomycetales(100);Microbacteriaceae(100);unclassified(100);                                                                                                                                          |
| 388 | 1 | 1 | 0 | 0 | Bacteria(100);"Proteobacteria"(100);Betaproteobacteria(100);Neisseriales(100);Neisseriaceae(100);Neisseria(100);                                                                                                                                                |
| 389 | 1 | 1 | 0 | 0 | Bacteria(100);"Proteobacteria"(100);Betaproteobacteria(100);Neisseriales(100);Neisseriaceae(100);unclassified(100);                                                                                                                                             |
| 390 | 1 | 1 | 0 | 0 | Bacteria(100);"Bacteroidetes"(100);Flavobacteria(100);"Flavobacteriales"(100);Flavobacteriaceae(100);Capnocytophaga(100);                                                                                                                                       |
| 391 | 1 | 1 | 0 | 0 | Bacteria(100);Firmicutes(100);Clostridia(100);Clostridiales(100);Clostridiaceae_1(100);unclassified(100);                                                                                                                                                       |
| 392 | 1 | 1 | 0 | 0 | Bacteria(100);"Proteobacteria"(100);Alphaproteobacteria(100);Sphingomonadales(100);unclassified(100);unclassified(100);                                                                                                                                         |
| 393 | 1 | 1 | 0 | 0 | Bacteria(100);"Proteobacteria"(100);Betaproteobacteria(100);Burkholderiales(100);unclassified(100);unclassified(100);                                                                                                                                           |
| 394 | 1 | 1 | 0 | 0 | Bacteria(100);"Bacteroidetes"(100);Flavobacteria(100);"Flavobacteriales"(100);Flavobacteriaceae(100);unclassified(100);                                                                                                                                         |
| 395 | 1 | 1 | 0 | 0 | Bacteria(100);unclassified(100);unclassified(100);unclassified(100);unclassified(100);unclassified(100);                                                                                                                                                        |
| 396 | 1 | 1 | 0 | 0 | Bacteria(100);Firmicutes(100);Clostridia(100);Clostridiales(100);Clostridiales_Incertae_Sedis_XI(100);Anaerococcus(100);                                                                                                                                        |
| 397 | 1 | 1 | 0 | 0 | Bacteria(100);Firmicutes(100);Clostridia(100);Clostridiales(100);Lachnospiraceae(100);unclassified(100);                                                                                                                                                        |
| 398 | 1 | 1 | 0 | 0 | Bacteria(100);"Proteobacteria"(100);Betaproteobacteria(100);Neisseriales(100);Neisseriaceae(100);unclassified(100);                                                                                                                                             |
| 399 | 1 | 1 | 0 | 0 | Bacteria(100);"Bacteroidetes"(100);Flavobacteria(100);"Flavobacteriales"(100);Flavobacteriaceae(100);Capnocytophaga(100);                                                                                                                                       |
| 400 | 1 | 1 | 0 | 0 | Bacteria(100);"Actinobacteria"(100);Actinobacteria(100);Actinomycetales(100);Nocardiaceae(100);Rhodococcus(100);                                                                                                                                                |
| 401 | 1 | 1 | 0 | 0 | Bacteria(100);unclassified(100);unclassified(100);unclassified(100);unclassified(100);unclassified(100);                                                                                                                                                        |
| 402 | 1 | 1 | 0 | 0 | Bacteria(100);Firmicutes(100);Negativicutes(100);Selenomonadales(100);Veillonellaceae(100);Veillonella(100);                                                                                                                                                    |
| 403 | 1 | 1 | 0 | 0 | Bacteria(100);"Bacteroidetes"(100);"Sphingobacteria"(100);"Sphingobacteriales"(100);Chitinophagaceae(100);Hydrotalea(100);                                                                                                                                      |
| 404 | 1 | 1 | 0 | 0 | Bacteria(100);"Fusobacteria"(100);"Fusobacteria"(100);"Fusobacteriales"(100);"Fusobacteriaceae"(100);unclassified(100);                                                                                                                                         |
| 405 | 1 | 1 | 0 | 0 | Bacteria(100);"Proteobacteria"(100);Alphaproteobacteria(100);Rhizobiales(100);Methylobacteriaceae(100);Methylobacterium(100);<br>Bacteria(100);"Proteobacteria"(100);Gammaproteobacteria(100);"Enterobacteriales"(100);Enterobacteriaceae(100);unclassified(100 |
| 406 | 1 | 1 | 0 | 0 | );                                                                                                                                                                                                                                                              |
| 407 | 1 | 1 | 0 | 0 | Bacteria(100);"Proteobacteria"(100);Gammaproteobacteria(100);unclassified(100);unclassified(100);unclassified(100);                                                                                                                                             |
| 408 | 1 | 1 | 0 | 0 | Bacteria(100);unclassified(100);unclassified(100);unclassified(100);unclassified(100);unclassified(100);                                                                                                                                                        |
| 409 | 1 | 1 | 0 | 0 | Bacteria(100);unclassified(100);unclassified(100);unclassified(100);unclassified(100);unclassified(100);<br>Bacteria(100);"Proteobacteria"(100);Gammaproteobacteria(100);"Enterobacteriales"(100);Enterobacteriaceae(100);unclassified(100                      |
| 410 | 1 | 1 | 0 | 0 | );                                                                                                                                                                                                                                                              |
| 411 | 1 | 1 | 0 | 0 | Bacteria(100);Firmicutes(100);Bacilli(100);Bacillales(100);unclassified(100);unclassified(100);                                                                                                                                                                 |
| 412 | 1 | 1 | 0 | 0 | Bacteria(100);Firmicutes(100);Bacilli(100);unclassified(100);unclassified(100);unclassified(100);                                                                                                                                                               |

|     |   |   |   |   |                                                                                                                                                                                                                                             |
|-----|---|---|---|---|---------------------------------------------------------------------------------------------------------------------------------------------------------------------------------------------------------------------------------------------|
| 413 | 1 | 1 | 0 | 0 | Bacteria(100);"Actinobacteria"(100);Actinobacteria(100);Actinomycetales(100);Actinomycetaceae(100);Actinomyces(100);                                                                                                                        |
| 414 | 1 | 1 | 0 | 0 | Bacteria(100);Firmicutes(100);Bacilli(100);Lactobacillales(100);Streptococcaceae(100);Streptococcus(100);                                                                                                                                   |
| 415 | 1 | 1 | 0 | 0 | Bacteria(100);Firmicutes(100);Bacilli(100);Lactobacillales(100);Streptococcaceae(100);Streptococcus(100);                                                                                                                                   |
| 416 | 1 | 1 | 0 | 0 | Bacteria(100);"Proteobacteria"(100);Betaproteobacteria(100);Neisseriales(100);Neisseriaceae(100);Neisseria(100);                                                                                                                            |
| 417 | 1 | 1 | 0 | 0 | Bacteria(100);"Proteobacteria"(100);unclassified(100);unclassified(100);unclassified(100);unclassified(100);                                                                                                                                |
| 418 | 1 | 1 | 0 | 0 | Bacteria(100);Firmicutes(100);Clostridia(100);Clostridiales(100);Lachnospiraceae(100);Anaerostipes(100);<br>Bacteria(100);"Proteobacteria"(100);Gammaproteobacteria(100);"Enterobacteriales"(100);Enterobacteriaceae(100);Escherichia_Shig  |
| 419 | 1 | 1 | 0 | 0 | ella(100);<br>Bacteria(100);TM7(100);TM7_class_incertae_sedis(100);TM7_order_incertae_sedis(100);TM7_family_incertae_sedis(100);TM7_gen                                                                                                     |
| 420 | 1 | 1 | 0 | 0 | us_incertae_sedis(100);                                                                                                                                                                                                                     |
| 421 | 1 | 1 | 0 | 0 | Bacteria(100);unclassified(100);unclassified(100);unclassified(100);unclassified(100);unclassified(100);                                                                                                                                    |
| 422 | 1 | 1 | 0 | 0 | Bacteria(100);"Fusobacteria"(100);"Fusobacteria"(100);"Fusobacteriales"(100);"Leptotrichiaceae"(100);Leptotrichia(100);                                                                                                                     |
| 423 | 1 | 0 | 1 | 0 | Bacteria(100);unclassified(100);unclassified(100);unclassified(100);unclassified(100);unclassified(100);<br>Bacteria(100);"Proteobacteria"(100);Gammaproteobacteria(100);Xanthomonadales(100);Xanthomonadaceae(100);Pseudoxanthomo          |
| 424 | 1 | 1 | 0 | 0 | nas(100);                                                                                                                                                                                                                                   |
| 425 | 1 | 1 | 0 | 0 | Bacteria(100);unclassified(100);unclassified(100);unclassified(100);unclassified(100);unclassified(100);                                                                                                                                    |
| 426 | 1 | 1 | 0 | 0 | Bacteria(100);"Proteobacteria"(100);Deltaproteobacteria(100);Myxococcales(100);Polyangiaceae(100);Chondromyces(100);                                                                                                                        |
| 427 | 2 | 2 | 0 | 0 | Bacteria(100);"Actinobacteria"(100);Actinobacteria(100);Actinomycetales(100);Nocardioideaceae(100);Marmoricola(100);                                                                                                                        |
| 428 | 1 | 1 | 0 | 0 | Bacteria(100);unclassified(100);unclassified(100);unclassified(100);unclassified(100);unclassified(100);                                                                                                                                    |
| 429 | 1 | 1 | 0 | 0 | Bacteria(100);unclassified(100);unclassified(100);unclassified(100);unclassified(100);unclassified(100);                                                                                                                                    |
| 430 | 1 | 1 | 0 | 0 | Bacteria(100);unclassified(100);unclassified(100);unclassified(100);unclassified(100);unclassified(100);                                                                                                                                    |
| 431 | 1 | 1 | 0 | 0 | Bacteria(100);unclassified(100);unclassified(100);unclassified(100);unclassified(100);unclassified(100);                                                                                                                                    |
| 432 | 1 | 1 | 0 | 0 | Bacteria(100);Firmicutes(100);Bacilli(100);Lactobacillales(100);Carnobacteriaceae(100);unclassified(100);                                                                                                                                   |
| 433 | 1 | 1 | 0 | 0 | Bacteria(100);unclassified(100);unclassified(100);unclassified(100);unclassified(100);unclassified(100);<br>Bacteria(100);"Verrucomicrobia"(100);Subdivision5(100);Subdivision5_order_incertae_sedis(100);Subdivision5_family_incertae_sedi |
| 434 | 2 | 2 | 0 | 0 | s(100);5_genus_incertae_sedis(100);                                                                                                                                                                                                         |
| 435 | 1 | 1 | 0 | 0 | Bacteria(100);"Actinobacteria"(100);Actinobacteria(100);Actinomycetales(100);unclassified(100);unclassified(100);                                                                                                                           |
| 436 | 1 | 1 | 0 | 0 | Bacteria(100);"Proteobacteria"(100);Epsilonproteobacteria(100);Campylobacterales(100);Helicobacteraceae(100);Wolinella(100);                                                                                                                |
| 437 | 1 | 1 | 0 | 0 | Bacteria(100);Firmicutes(100);Clostridia(100);Clostridiales(100);Clostridiales_Incertae_Sedis_XI(100);Anaerococcus(100);                                                                                                                    |
| 438 | 1 | 1 | 0 | 0 | Bacteria(100);unclassified(100);unclassified(100);unclassified(100);unclassified(100);unclassified(100);                                                                                                                                    |
| 439 | 1 | 1 | 0 | 0 | Bacteria(100);unclassified(100);unclassified(100);unclassified(100);unclassified(100);unclassified(100);                                                                                                                                    |

|     |   |   |   |   |                                                                                                                                                                                                                                       |
|-----|---|---|---|---|---------------------------------------------------------------------------------------------------------------------------------------------------------------------------------------------------------------------------------------|
| 440 | 1 | 1 | 0 | 0 | Bacteria(100);"Fusobacteria"(100);"Fusobacteria"(100);"Fusobacteriales"(100);"Fusobacteriaceae"(100);Cetobacterium(100);                                                                                                              |
| 441 | 1 | 1 | 0 | 0 | Bacteria(100);"Fusobacteria"(100);"Fusobacteria"(100);"Fusobacteriales"(100);"Fusobacteriaceae"(100);Fusobacterium(100);                                                                                                              |
| 442 | 1 | 1 | 0 | 0 | Bacteria(100);Firmicutes(100);Clostridia(100);Clostridiales(100);Clostridiaceae_1(100);unclassified(100);                                                                                                                             |
| 443 | 1 | 1 | 0 | 0 | Bacteria(100);"Proteobacteria"(100);unclassified(100);unclassified(100);unclassified(100);unclassified(100);                                                                                                                          |
| 444 | 1 | 1 | 0 | 0 | Bacteria(100);unclassified(100);unclassified(100);unclassified(100);unclassified(100);unclassified(100);                                                                                                                              |
| 445 | 1 | 1 | 0 | 0 | Bacteria(100);"Bacteroidetes"(100);"Sphingobacteria"(100);"Sphingobacteriales"(100);Cytophagaceae(100);Hymenobacter(100);                                                                                                             |
| 446 | 1 | 1 | 0 | 0 | Bacteria(100);unclassified(100);unclassified(100);unclassified(100);unclassified(100);unclassified(100);                                                                                                                              |
| 447 | 2 | 2 | 0 | 0 | Bacteria(100);unclassified(100);unclassified(100);unclassified(100);unclassified(100);unclassified(100);<br>Bacteria(100);"Proteobacteria"(100);Alphaproteobacteria(100);Sphingomonadales(100);Sphingomonadaceae(100);Sphingobium(100 |
| 448 | 1 | 1 | 0 | 0 | );                                                                                                                                                                                                                                    |
| 449 | 1 | 1 | 0 | 0 | Bacteria(100);"Proteobacteria"(100);Betaproteobacteria(100);Burkholderiales(100);Sutterellaceae(100);Sutterella(100);                                                                                                                 |
| 450 | 1 | 1 | 0 | 0 | Bacteria(100);"Actinobacteria"(100);Actinobacteria(100);Actinomycetales(100);unclassified(100);unclassified(100);                                                                                                                     |
| 451 | 1 | 1 | 0 | 0 | Bacteria(100);Firmicutes(100);Bacilli(100);Lactobacillales(100);Lactobacillaceae(100);Lactobacillus(100);                                                                                                                             |
| 452 | 1 | 1 | 0 | 0 | Bacteria(100);unclassified(100);unclassified(100);unclassified(100);unclassified(100);unclassified(100);                                                                                                                              |
| 453 | 1 | 1 | 0 | 0 | Bacteria(100);"Proteobacteria"(100);Gammaproteobacteria(100);Chromatiales(100);Halothiobacillaceae(100);Thiofaba(100);                                                                                                                |
| 454 | 1 | 1 | 0 | 0 | Bacteria(100);unclassified(100);unclassified(100);unclassified(100);unclassified(100);unclassified(100);                                                                                                                              |
| 455 | 1 | 1 | 0 | 0 | Bacteria(100);Firmicutes(100);Bacilli(100);Lactobacillales(100);Streptococcaceae(100);Streptococcus(100);                                                                                                                             |
| 456 | 1 | 1 | 0 | 0 | Bacteria(100);"Fusobacteria"(100);"Fusobacteria"(100);"Fusobacteriales"(100);"Leptotrichiaceae"(100);Leptotrichia(100);                                                                                                               |
| 457 | 1 | 1 | 0 | 0 | Bacteria(100);Firmicutes(100);Clostridia(100);Clostridiales(100);unclassified(100);unclassified(100);                                                                                                                                 |
| 458 | 1 | 1 | 0 | 0 | Bacteria(100);Firmicutes(100);Clostridia(100);Clostridiales(100);unclassified(100);unclassified(100);                                                                                                                                 |
| 459 | 1 | 1 | 0 | 0 | Bacteria(100);"Proteobacteria"(100);Alphaproteobacteria(100);Rhizobiales(100);unclassified(100);unclassified(100);                                                                                                                    |
| 460 | 1 | 1 | 0 | 0 | Bacteria(100);unclassified(100);unclassified(100);unclassified(100);unclassified(100);unclassified(100);                                                                                                                              |
| 461 | 1 | 1 | 0 | 0 | Bacteria(100);"Proteobacteria"(100);Alphaproteobacteria(100);Rhizobiales(100);"Aurantimonadaceae"(100);Aurantimonas(100);                                                                                                             |
| 462 | 1 | 1 | 0 | 0 | Bacteria(100);unclassified(100);unclassified(100);unclassified(100);unclassified(100);unclassified(100);                                                                                                                              |
| 463 | 1 | 1 | 0 | 0 | Bacteria(100);"Proteobacteria"(100);Alphaproteobacteria(100);unclassified(100);unclassified(100);unclassified(100);                                                                                                                   |
| 464 | 1 | 1 | 0 | 0 | Bacteria(100);unclassified(100);unclassified(100);unclassified(100);unclassified(100);unclassified(100);                                                                                                                              |
| 465 | 1 | 1 | 0 | 0 | Bacteria(100);unclassified(100);unclassified(100);unclassified(100);unclassified(100);unclassified(100);                                                                                                                              |
| 466 | 1 | 1 | 0 | 0 | Bacteria(100);Firmicutes(100);Clostridia(100);Clostridiales(100);Clostridiaceae_1(100);unclassified(100);                                                                                                                             |
| 467 | 1 | 1 | 0 | 0 | Bacteria(100);unclassified(100);unclassified(100);unclassified(100);unclassified(100);unclassified(100);                                                                                                                              |
| 468 | 1 | 1 | 0 | 0 | Bacteria(100);Firmicutes(100);Clostridia(100);Clostridiales(100);Lachnospiraceae(100);unclassified(100);                                                                                                                              |
| 469 | 1 | 1 | 0 | 0 | Bacteria(100);unclassified(100);unclassified(100);unclassified(100);unclassified(100);unclassified(100);                                                                                                                              |

|     |   |   |   |   |                                                                                                                                                  |
|-----|---|---|---|---|--------------------------------------------------------------------------------------------------------------------------------------------------|
| 470 | 1 | 1 | 0 | 0 | Bacteria(100);"Proteobacteria"(100);Alphaproteobacteria(100);Sphingomonadales(100);Erythrobacteraceae(100);Erythrobacter(100);                   |
| 471 | 2 | 2 | 0 | 0 | Bacteria(100);Firmicutes(100);Erysipelotrichia(100);Erysipelotrichales(100);Erysipelotrichaceae(100);Catenibacterium(100);                       |
| 472 | 1 | 1 | 0 | 0 | Bacteria(100);Firmicutes(100);Negativicutes(100);Selenomonadales(100);Veillonellaceae(100);unclassified(100);                                    |
| 473 | 1 | 1 | 0 | 0 | Bacteria(100);"Proteobacteria"(100);Betaproteobacteria(100);Neisseriales(100);Neisseriaceae(100);unclassified(100);                              |
| 474 | 1 | 1 | 0 | 0 | Bacteria(100);Firmicutes(100);Bacilli(100);Lactobacillales(100);Carnobacteriaceae(100);unclassified(100);                                        |
| 475 | 1 | 1 | 0 | 0 | Bacteria(100);"Actinobacteria"(100);Actinobacteria(100);Actinomycetales(100);Microbacteriaceae(100);Leucobacter(100);                            |
| 476 | 3 | 3 | 0 | 0 | Bacteria(100);TM7(100);TM7_class_incertae_sedis(100);TM7_order_incertae_sedis(100);TM7_family_incertae_sedis(100);TM7_genus_incertae_sedis(100); |
| 477 | 1 | 1 | 0 | 0 | Bacteria(100);unclassified(100);unclassified(100);unclassified(100);unclassified(100);unclassified(100);                                         |
| 478 | 1 | 1 | 0 | 0 | Bacteria(100);unclassified(100);unclassified(100);unclassified(100);unclassified(100);unclassified(100);                                         |
| 479 | 1 | 1 | 0 | 0 | Bacteria(100);Firmicutes(100);Bacilli(100);Lactobacillales(100);Streptococcaceae(100);Streptococcus(100);                                        |
| 480 | 1 | 0 | 0 | 1 | Bacteria(100);"Actinobacteria"(100);Actinobacteria(100);Actinomycetales(100);Nocardioideaceae(100);Nocardioideales(100);                         |
| 481 | 1 | 1 | 0 | 0 | Bacteria(100);"Proteobacteria"(100);Betaproteobacteria(100);Neisseriales(100);Neisseriaceae(100);Neisseria(100);                                 |
| 482 | 1 | 1 | 0 | 0 | Bacteria(100);unclassified(100);unclassified(100);unclassified(100);unclassified(100);unclassified(100);                                         |
| 483 | 1 | 1 | 0 | 0 | Bacteria(100);"Actinobacteria"(100);Actinobacteria(100);Actinomycetales(100);unclassified(100);unclassified(100);                                |
| 484 | 3 | 3 | 0 | 0 | Bacteria(100);unclassified(100);unclassified(100);unclassified(100);unclassified(100);unclassified(100);                                         |
| 485 | 1 | 1 | 0 | 0 | Bacteria(100);Firmicutes(100);Bacilli(100);Bacillales(100);Staphylococcaceae(100);Staphylococcus(100);                                           |
| 486 | 1 | 1 | 0 | 0 | Bacteria(100);Firmicutes(100);Bacilli(100);Lactobacillales(100);unclassified(100);unclassified(100);                                             |
| 487 | 1 | 1 | 0 | 0 | Bacteria(100);"Proteobacteria"(100);Alphaproteobacteria(100);Sphingomonadales(100);unclassified(100);unclassified(100);                          |
| 488 | 1 | 1 | 0 | 0 | Bacteria(100);"Actinobacteria"(100);Actinobacteria(100);Actinomycetales(100);unclassified(100);unclassified(100);                                |
| 489 | 1 | 1 | 0 | 0 | Bacteria(100);"Proteobacteria"(100);Alphaproteobacteria(100);Sphingomonadales(100);Erythrobacteraceae(100);unclassified(100);                    |
| 490 | 1 | 1 | 0 | 0 | Bacteria(100);Firmicutes(100);Clostridia(100);Clostridiales(100);Clostridiaceae_1(100);unclassified(100);                                        |
| 491 | 1 | 1 | 0 | 0 | Bacteria(100);"Actinobacteria"(100);Actinobacteria(100);Coriobacteriales(100);Coriobacteriaceae(100);Atopobium(100);                             |
| 492 | 1 | 1 | 0 | 0 | Bacteria(100);"Proteobacteria"(100);Alphaproteobacteria(100);Rhizobiales(100);unclassified(100);unclassified(100);                               |
| 493 | 1 | 1 | 0 | 0 | Bacteria(100);"Bacteroidetes"(100);Flavobacteria(100);"Flavobacteriales"(100);Cryomorphaceae(100);Fluviicola(100);                               |
| 494 | 1 | 1 | 0 | 0 | Bacteria(100);"Proteobacteria"(100);Betaproteobacteria(100);Rhodocyclales(100);Rhodocyclaceae(100);unclassified(100);                            |
| 495 | 1 | 1 | 0 | 0 | Bacteria(100);unclassified(100);unclassified(100);unclassified(100);unclassified(100);unclassified(100);                                         |
| 496 | 2 | 2 | 0 | 0 | Bacteria(100);"Proteobacteria"(100);Betaproteobacteria(100);Burkholderiales(100);unclassified(100);unclassified(100);                            |
| 497 | 2 | 2 | 0 | 0 | Bacteria(100);"Actinobacteria"(100);Actinobacteria(100);Coriobacteriales(100);Coriobacteriaceae(100);Olsenella(100);                             |

|     |   |   |   |   |                                                                                                                                                                                                                                                         |
|-----|---|---|---|---|---------------------------------------------------------------------------------------------------------------------------------------------------------------------------------------------------------------------------------------------------------|
| 498 | 1 | 1 | 0 | 0 | Bacteria(100);"Fusobacteria"(100);"Fusobacteria"(100);"Fusobacteriales"(100);"Fusobacteriaceae"(100);Cetobacterium(100);                                                                                                                                |
| 499 | 1 | 1 | 0 | 0 | Bacteria(100);Firmicutes(100);Negativicutes(100);Selenomonadales(100);Veillonellaceae(100);unclassified(100);                                                                                                                                           |
| 500 | 1 | 1 | 0 | 0 | Bacteria(100);"Actinobacteria"(100);Actinobacteria(100);Actinomycetales(100);unclassified(100);unclassified(100);                                                                                                                                       |
| 501 | 1 | 1 | 0 | 0 | Bacteria(100);unclassified(100);unclassified(100);unclassified(100);unclassified(100);unclassified(100);                                                                                                                                                |
| 502 | 1 | 1 | 0 | 0 | Bacteria(100);unclassified(100);unclassified(100);unclassified(100);unclassified(100);unclassified(100);                                                                                                                                                |
| 503 | 1 | 1 | 0 | 0 | Bacteria(100);unclassified(100);unclassified(100);unclassified(100);unclassified(100);unclassified(100);<br>Bacteria(100);OD1(100);OD1_class_incertae_sedis(100);OD1_order_incertae_sedis(100);OD1_family_incertae_sedis(100);OD1_genu                  |
| 504 | 1 | 1 | 0 | 0 | s_incertae_sedis(100);                                                                                                                                                                                                                                  |
| 505 | 1 | 1 | 0 | 0 | Bacteria(100);Firmicutes(100);Clostridia(100);Clostridiales(100);Clostridiaceae_1(100);unclassified(100);                                                                                                                                               |
| 506 | 1 | 1 | 0 | 0 | Bacteria(100);unclassified(100);unclassified(100);unclassified(100);unclassified(100);unclassified(100);                                                                                                                                                |
| 507 | 1 | 1 | 0 | 0 | Bacteria(100);"Proteobacteria"(100);Gammaproteobacteria(100);unclassified(100);unclassified(100);unclassified(100);                                                                                                                                     |
| 508 | 1 | 1 | 0 | 0 | Bacteria(100);Firmicutes(100);Bacilli(100);Lactobacillales(100);Streptococcaceae(100);Streptococcus(100);                                                                                                                                               |
| 509 | 1 | 1 | 0 | 0 | Bacteria(100);"Proteobacteria"(100);Gammaproteobacteria(100);Pasteurellales(100);Pasteurellaceae(100);unclassified(100);                                                                                                                                |
| 510 | 1 | 1 | 0 | 0 | Bacteria(100);"Actinobacteria"(100);Actinobacteria(100);Actinomycetales(100);Nocardioideaceae(100);Nocardioides(100);                                                                                                                                   |
| 511 | 1 | 1 | 0 | 0 | Bacteria(100);unclassified(100);unclassified(100);unclassified(100);unclassified(100);unclassified(100);                                                                                                                                                |
| 512 | 3 | 3 | 0 | 0 | Bacteria(100);"Proteobacteria"(100);Alphaproteobacteria(100);Rhizobiales(100);Rhizobiaceae(100);Rhizobium(100);                                                                                                                                         |
| 513 | 1 | 1 | 0 | 0 | Bacteria(100);Firmicutes(100);Bacilli(100);Bacillales(100);Staphylococcaceae(100);Staphylococcus(100);                                                                                                                                                  |
| 514 | 1 | 1 | 0 | 0 | Bacteria(100);"Proteobacteria"(100);Gammaproteobacteria(100);Xanthomonadales(100);Xanthomonadaceae(100);unclassified(100);<br>Bacteria(100);"Proteobacteria"(100);Gammaproteobacteria(100);Pseudomonadales(100);Pseudomonadaceae(100);unclassified(100) |
| 515 | 1 | 1 | 0 | 0 | ;                                                                                                                                                                                                                                                       |
| 516 | 1 | 1 | 0 | 0 | Bacteria(100);"Fusobacteria"(100);"Fusobacteria"(100);"Fusobacteriales"(100);"Fusobacteriaceae"(100);unclassified(100);                                                                                                                                 |
| 517 | 1 | 1 | 0 | 0 | Bacteria(100);Firmicutes(100);Bacilli(100);Lactobacillales(100);unclassified(100);unclassified(100);                                                                                                                                                    |
| 518 | 1 | 1 | 0 | 0 | Bacteria(100);unclassified(100);unclassified(100);unclassified(100);unclassified(100);unclassified(100);                                                                                                                                                |
| 519 | 1 | 1 | 0 | 0 | Bacteria(100);unclassified(100);unclassified(100);unclassified(100);unclassified(100);unclassified(100);                                                                                                                                                |
| 520 | 1 | 1 | 0 | 0 | Bacteria(100);unclassified(100);unclassified(100);unclassified(100);unclassified(100);unclassified(100);                                                                                                                                                |
| 521 | 1 | 1 | 0 | 0 | Bacteria(100);"Proteobacteria"(100);Alphaproteobacteria(100);unclassified(100);unclassified(100);unclassified(100);                                                                                                                                     |
| 522 | 1 | 1 | 0 | 0 | Bacteria(100);"Actinobacteria"(100);Actinobacteria(100);Actinomycetales(100);unclassified(100);unclassified(100);                                                                                                                                       |
| 523 | 1 | 1 | 0 | 0 | Bacteria(100);"Proteobacteria"(100);Alphaproteobacteria(100);Rhodobacterales(100);Rhodobacteraceae(100);unclassified(100);                                                                                                                              |
| 524 | 1 | 1 | 0 | 0 | Bacteria(100);"Actinobacteria"(100);Actinobacteria(100);Actinomycetales(100);Actinomycetaceae(100);Actinomyces(100);                                                                                                                                    |
| 525 | 1 | 1 | 0 | 0 | Bacteria(100);Firmicutes(100);Bacilli(100);Lactobacillales(100);unclassified(100);unclassified(100);                                                                                                                                                    |
| 526 | 1 | 1 | 0 | 0 | Bacteria(100);Firmicutes(100);Bacilli(100);Lactobacillales(100);unclassified(100);unclassified(100);                                                                                                                                                    |

|     |   |   |   |   |                                                                                                                                                                                                                                         |
|-----|---|---|---|---|-----------------------------------------------------------------------------------------------------------------------------------------------------------------------------------------------------------------------------------------|
| 527 | 1 | 1 | 0 | 0 | Bacteria(100);unclassified(100);unclassified(100);unclassified(100);unclassified(100);unclassified(100);<br>Bacteria(100);"Proteobacteria"(100);Gammaproteobacteria(100);Pseudomonadales(100);Pseudomonadaceae(100);unclassified(100)   |
| 528 | 1 | 1 | 0 | 0 | ;                                                                                                                                                                                                                                       |
| 529 | 1 | 1 | 0 | 0 | Bacteria(100);"Proteobacteria"(100);Alphaproteobacteria(100);Caulobacterales(100);Caulobacteraceae(100);Brevundimonas(100);                                                                                                             |
| 530 | 1 | 1 | 0 | 0 | Bacteria(100);"Proteobacteria"(100);Betaproteobacteria(100);Neisseriales(100);Neisseriaceae(100);Neisseria(100);                                                                                                                        |
| 531 | 1 | 1 | 0 | 0 | Bacteria(100);"Fusobacteria"(100);"Fusobacteria"(100);"Fusobacteriales"(100);"Fusobacteriaceae"(100);unclassified(100);                                                                                                                 |
| 532 | 1 | 1 | 0 | 0 | Bacteria(100);unclassified(100);unclassified(100);unclassified(100);unclassified(100);unclassified(100);                                                                                                                                |
| 533 | 1 | 1 | 0 | 0 | Bacteria(100);"Proteobacteria"(100);Alphaproteobacteria(100);Rhodospirillales(100);Acetobacteraceae(100);Roseomonas(100);                                                                                                               |
| 534 | 1 | 1 | 0 | 0 | Bacteria(100);unclassified(100);unclassified(100);unclassified(100);unclassified(100);unclassified(100);                                                                                                                                |
| 535 | 1 | 1 | 0 | 0 | Bacteria(100);"Actinobacteria"(100);Actinobacteria(100);Actinomycetales(100);Micrococcaceae(100);Rothia(100);                                                                                                                           |
| 536 | 1 | 1 | 0 | 0 | Bacteria(100);unclassified(100);unclassified(100);unclassified(100);unclassified(100);unclassified(100);                                                                                                                                |
| 537 | 1 | 1 | 0 | 0 | Bacteria(100);"Actinobacteria"(100);Actinobacteria(100);Acidimicrobiales(100);unclassified(100);unclassified(100);                                                                                                                      |
| 538 | 1 | 1 | 0 | 0 | Bacteria(100);"Proteobacteria"(100);Alphaproteobacteria(100);unclassified(100);unclassified(100);unclassified(100);                                                                                                                     |
| 539 | 1 | 1 | 0 | 0 | Bacteria(100);unclassified(100);unclassified(100);unclassified(100);unclassified(100);unclassified(100);                                                                                                                                |
| 540 | 1 | 1 | 0 | 0 | Bacteria(100);unclassified(100);unclassified(100);unclassified(100);unclassified(100);unclassified(100);                                                                                                                                |
| 541 | 1 | 1 | 0 | 0 | Bacteria(100);"Proteobacteria"(100);Gammaproteobacteria(100);Pasteurellales(100);Pasteurellaceae(100);unclassified(100);                                                                                                                |
| 542 | 1 | 1 | 0 | 0 | Bacteria(100);unclassified(100);unclassified(100);unclassified(100);unclassified(100);unclassified(100);                                                                                                                                |
| 543 | 1 | 1 | 0 | 0 | Bacteria(100);unclassified(100);unclassified(100);unclassified(100);unclassified(100);unclassified(100);                                                                                                                                |
| 544 | 1 | 1 | 0 | 0 | Bacteria(100);Firmicutes(100);Clostridia(100);Clostridiales(100);unclassified(100);unclassified(100);                                                                                                                                   |
| 545 | 1 | 1 | 0 | 0 | Bacteria(100);"Actinobacteria"(100);Actinobacteria(100);Actinomycetales(100);unclassified(100);unclassified(100);                                                                                                                       |
| 546 | 1 | 1 | 0 | 0 | Bacteria(100);unclassified(100);unclassified(100);unclassified(100);unclassified(100);unclassified(100);                                                                                                                                |
| 547 | 1 | 1 | 0 | 0 | Bacteria(100);Firmicutes(100);Erysipelotrichia(100);Erysipelotrichales(100);Erysipelotrichaceae(100);Bulleidia(100);                                                                                                                    |
| 548 | 1 | 1 | 0 | 0 | Bacteria(100);"Actinobacteria"(100);Actinobacteria(100);Bifidobacteriales(100);Bifidobacteriaceae(100);Gardnerella(100);                                                                                                                |
| 549 | 1 | 1 | 0 | 0 | Bacteria(100);Firmicutes(100);Bacilli(100);Lactobacillales(100);Streptococcaceae(100);Streptococcus(100);                                                                                                                               |
| 550 | 1 | 1 | 0 | 0 | Bacteria(100);"Proteobacteria"(100);Betaproteobacteria(100);Rhodocyclales(100);Rhodocyclaceae(100);Zoogloea(100);                                                                                                                       |
| 551 | 1 | 1 | 0 | 0 | Bacteria(100);Firmicutes(100);Clostridia(100);Clostridiales(100);unclassified(100);unclassified(100);<br>Bacteria(100);"Proteobacteria"(100);Gammaproteobacteria(100);"Enterobacteriales"(100);Enterobacteriaceae(100);Escherichia_Shig |
| 552 | 1 | 1 | 0 | 0 | ella(100);                                                                                                                                                                                                                              |
| 553 | 1 | 1 | 0 | 0 | Bacteria(100);"Bacteroidetes"(100);Flavobacteria(100);"Flavobacteriales"(100);Flavobacteriaceae(100);Chryseobacterium(100);                                                                                                             |
| 554 | 1 | 1 | 0 | 0 | Bacteria(100);unclassified(100);unclassified(100);unclassified(100);unclassified(100);unclassified(100);                                                                                                                                |
| 555 | 1 | 1 | 0 | 0 | Bacteria(100);"Proteobacteria"(100);Alphaproteobacteria(100);unclassified(100);unclassified(100);unclassified(100);                                                                                                                     |



|     |   |   |   |   |                                                                                                                                                                                                                                                       |
|-----|---|---|---|---|-------------------------------------------------------------------------------------------------------------------------------------------------------------------------------------------------------------------------------------------------------|
| 556 | 1 | 1 | 0 | 0 | Bacteria(100);"Proteobacteria"(100);Alphaproteobacteria(100);Rhizobiales(100);unclassified(100);unclassified(100);                                                                                                                                    |
| 557 | 1 | 1 | 0 | 0 | Bacteria(100);Firmicutes(100);Bacilli(100);Lactobacillales(100);Streptococcaceae(100);Streptococcus(100);                                                                                                                                             |
| 558 | 1 | 1 | 0 | 0 | Bacteria(100);Firmicutes(100);unclassified(100);unclassified(100);unclassified(100);unclassified(100);                                                                                                                                                |
| 559 | 1 | 1 | 0 | 0 | Bacteria(100);unclassified(100);unclassified(100);unclassified(100);unclassified(100);unclassified(100);                                                                                                                                              |
| 560 | 1 | 1 | 0 | 0 | Bacteria(100);"Proteobacteria"(100);Gammaproteobacteria(100);unclassified(100);unclassified(100);unclassified(100);                                                                                                                                   |
| 561 | 1 | 1 | 0 | 0 | Bacteria(100);"Proteobacteria"(100);Alphaproteobacteria(100);Rhizobiales(100);unclassified(100);unclassified(100);<br>Bacteria(100);"Proteobacteria"(100);Epsilonproteobacteria(100);Campylobacterales(100);Campylobacteraceae(100);Campylobacter(    |
| 562 | 1 | 1 | 0 | 0 | 100);                                                                                                                                                                                                                                                 |
| 563 | 1 | 1 | 0 | 0 | Bacteria(100);"Bacteroidetes"(100);"Bacteroidia"(100);"Bacteroidales"(100);"Prevotellaceae"(100);Prevotella(100);                                                                                                                                     |
| 564 | 1 | 1 | 0 | 0 | Bacteria(100);"Bacteroidetes"(100);Flavobacteria(100);"Flavobacteriales"(100);Flavobacteriaceae(100);Flavobacterium(100);                                                                                                                             |
| 565 | 1 | 1 | 0 | 0 | Bacteria(100);Firmicutes(100);Bacilli(100);Lactobacillales(100);Streptococcaceae(100);Streptococcus(100);                                                                                                                                             |
| 566 | 1 | 1 | 0 | 0 | Bacteria(100);"Chloroflexi"(100);unclassified(100);unclassified(100);unclassified(100);unclassified(100);                                                                                                                                             |
| 567 | 1 | 1 | 0 | 0 | Bacteria(100);"Proteobacteria"(100);Alphaproteobacteria(100);Rhodospirillales(100);Acetobacteraceae(100);unclassified(100);                                                                                                                           |
| 568 | 1 | 1 | 0 | 0 | Bacteria(100);unclassified(100);unclassified(100);unclassified(100);unclassified(100);unclassified(100);                                                                                                                                              |
| 569 | 1 | 1 | 0 | 0 | Bacteria(100);unclassified(100);unclassified(100);unclassified(100);unclassified(100);unclassified(100);<br>Bacteria(100);"Proteobacteria"(100);Gammaproteobacteria(100);"Enterobacteriales"(100);Enterobacteriaceae(100);unclassified(100            |
| 570 | 2 | 2 | 0 | 0 | );                                                                                                                                                                                                                                                    |
| 571 | 1 | 1 | 0 | 0 | Bacteria(100);"Proteobacteria"(100);Deltaproteobacteria(100);Bdellovibrionales(100);Bacteriovoracaceae(100);Peredibacter(100);                                                                                                                        |
| 572 | 1 | 1 | 0 | 0 | Bacteria(100);"Bacteroidetes"(100);"Sphingobacteria"(100);"Sphingobacteriales"(100);Sphingobacteriaceae(100);unclassified(100);                                                                                                                       |
| 573 | 1 | 1 | 0 | 0 | Bacteria(100);Firmicutes(100);Bacilli(100);Bacillales(100);Staphylococcaceae(100);Staphylococcus(100);                                                                                                                                                |
| 574 | 1 | 1 | 0 | 0 | Bacteria(100);"Proteobacteria"(100);Betaproteobacteria(100);Neisseriales(100);Neisseriaceae(100);Bergeriella(100);                                                                                                                                    |
| 575 | 4 | 1 | 0 | 3 | Bacteria(100);Firmicutes(100);Bacilli(100);Bacillales(100);Listeriaceae(100);Brochothrix(100);                                                                                                                                                        |
| 576 | 1 | 1 | 0 | 0 | Bacteria(100);unclassified(100);unclassified(100);unclassified(100);unclassified(100);unclassified(100);                                                                                                                                              |
| 577 | 1 | 1 | 0 | 0 | Bacteria(100);Firmicutes(100);Clostridia(100);Clostridiales(100);Lachnospiraceae(100);unclassified(100);                                                                                                                                              |
| 578 | 1 | 1 | 0 | 0 | Bacteria(100);"Bacteroidetes"(100);unclassified(100);unclassified(100);unclassified(100);unclassified(100);                                                                                                                                           |
| 579 | 1 | 1 | 0 | 0 | Bacteria(100);"Fusobacteria"(100);"Fusobacteria"(100);"Fusobacteriales"(100);"Leptotrichiaceae"(100);Leptotrichia(100);                                                                                                                               |
| 580 | 1 | 1 | 0 | 0 | Bacteria(100);"Proteobacteria"(100);Gammaproteobacteria(100);unclassified(100);unclassified(100);unclassified(100);<br>Bacteria(100);"Proteobacteria"(100);Gammaproteobacteria(100);"Enterobacteriales"(100);Enterobacteriaceae(100);unclassified(100 |
| 581 | 1 | 1 | 0 | 0 | );                                                                                                                                                                                                                                                    |
| 582 | 1 | 1 | 0 | 0 | Bacteria(100);"Bacteroidetes"(100);Flavobacteria(100);"Flavobacteriales"(100);Flavobacteriaceae(100);Wautersiella(100);                                                                                                                               |
| 583 | 1 | 1 | 0 | 0 | Bacteria(100);Firmicutes(100);Bacilli(100);Bacillales(100);unclassified(100);unclassified(100);                                                                                                                                                       |

|     |   |   |   |   |                                                                                                                                                                                                                                                       |
|-----|---|---|---|---|-------------------------------------------------------------------------------------------------------------------------------------------------------------------------------------------------------------------------------------------------------|
| 584 | 1 | 1 | 0 | 0 | Bacteria(100);"Proteobacteria"(100);Alphaproteobacteria(100);Sphingomonadales(100);Sphingomonadaceae(100);Blastomonas(100);                                                                                                                           |
| 585 | 1 | 1 | 0 | 0 | Bacteria(100);Firmicutes(100);Clostridia(100);Clostridiales(100);Ruminococcaceae(100);Ruminococcus(100);                                                                                                                                              |
| 586 | 1 | 1 | 0 | 0 | Bacteria(100);Firmicutes(100);Bacilli(100);unclassified(100);unclassified(100);unclassified(100);                                                                                                                                                     |
| 587 | 1 | 1 | 0 | 0 | Bacteria(100);"Actinobacteria"(100);Actinobacteria(100);Actinomycetales(100);Actinomycetaceae(100);Actinomyces(100);                                                                                                                                  |
| 588 | 2 | 2 | 0 | 0 | Bacteria(100);Firmicutes(100);Clostridia(100);Clostridiales(100);Ruminococcaceae(100);unclassified(100);                                                                                                                                              |
| 589 | 1 | 1 | 0 | 0 | Bacteria(100);unclassified(100);unclassified(100);unclassified(100);unclassified(100);unclassified(100);                                                                                                                                              |
| 590 | 1 | 1 | 0 | 0 | Bacteria(100);Firmicutes(100);Bacilli(100);unclassified(100);unclassified(100);unclassified(100);                                                                                                                                                     |
| 591 | 1 | 1 | 0 | 0 | Bacteria(100);Firmicutes(100);Bacilli(100);Lactobacillales(100);Carnobacteriaceae(100);Granulicatella(100);                                                                                                                                           |
| 592 | 1 | 1 | 0 | 0 | Bacteria(100);Firmicutes(100);Bacilli(100);Lactobacillales(100);Streptococcaceae(100);Streptococcus(100);                                                                                                                                             |
| 593 | 1 | 1 | 0 | 0 | Bacteria(100);"Bacteroidetes"(100);"Sphingobacteria"(100);"Sphingobacteriales"(100);Sphingobacteriaceae(100);unclassified(100);                                                                                                                       |
| 594 | 1 | 1 | 0 | 0 | Bacteria(100);unclassified(100);unclassified(100);unclassified(100);unclassified(100);unclassified(100);                                                                                                                                              |
| 595 | 2 | 2 | 0 | 0 | Bacteria(100);Firmicutes(100);Bacilli(100);Lactobacillales(100);Streptococcaceae(100);Streptococcus(100);                                                                                                                                             |
| 596 | 1 | 1 | 0 | 0 | Bacteria(100);"Fusobacteria"(100);"Fusobacteria"(100);"Fusobacteriales"(100);"Fusobacteriaceae"(100);Fusobacterium(100);<br>Bacteria(100);TM7(100);TM7_class_incertae_sedis(100);TM7_order_incertae_sedis(100);TM7_family_incertae_sedis(100);TM7_gen |
| 597 | 1 | 1 | 0 | 0 | us_incertae_sedis(100);                                                                                                                                                                                                                               |
| 598 | 1 | 1 | 0 | 0 | Bacteria(100);"Proteobacteria"(100);Betaproteobacteria(100);Neisseriales(100);Neisseriaceae(100);Neisseria(100);                                                                                                                                      |
| 599 | 1 | 1 | 0 | 0 | Bacteria(100);"Proteobacteria"(100);unclassified(100);unclassified(100);unclassified(100);unclassified(100);                                                                                                                                          |
| 600 | 1 | 1 | 0 | 0 | Bacteria(100);Firmicutes(100);Bacilli(100);Bacillales(100);Staphylococcaceae(100);unclassified(100);                                                                                                                                                  |
| 601 | 1 | 1 | 0 | 0 | Bacteria(100);"Actinobacteria"(100);Actinobacteria(100);Actinomycetales(100);unclassified(100);unclassified(100);                                                                                                                                     |
| 602 | 1 | 1 | 0 | 0 | Bacteria(100);"Proteobacteria"(100);Betaproteobacteria(100);Burkholderiales(100);Comamonadaceae(100);unclassified(100);                                                                                                                               |
| 603 | 1 | 1 | 0 | 0 | Bacteria(100);Firmicutes(100);Clostridia(100);Clostridiales(100);Lachnospiraceae(100);Anaerostipes(100);                                                                                                                                              |
| 604 | 1 | 1 | 0 | 0 | Bacteria(100);"Proteobacteria"(100);Betaproteobacteria(100);Neisseriales(100);Neisseriaceae(100);unclassified(100);<br>Bacteria(100);"Proteobacteria"(100);Gammaproteobacteria(100);"Enterobacteriales"(100);Enterobacteriaceae(100);Escherichia_Shig |
| 605 | 3 | 3 | 0 | 0 | ella(100);                                                                                                                                                                                                                                            |
| 606 | 1 | 1 | 0 | 0 | Bacteria(100);"Proteobacteria"(100);Betaproteobacteria(100);Burkholderiales(100);Comamonadaceae(100);unclassified(100);                                                                                                                               |
| 607 | 1 | 1 | 0 | 0 | Bacteria(100);Firmicutes(100);Bacilli(100);unclassified(100);unclassified(100);unclassified(100);<br>Bacteria(100);TM7(100);TM7_class_incertae_sedis(100);TM7_order_incertae_sedis(100);TM7_family_incertae_sedis(100);TM7_gen                        |
| 608 | 1 | 1 | 0 | 0 | us_incertae_sedis(100);                                                                                                                                                                                                                               |
| 609 | 1 | 1 | 0 | 0 | Bacteria(100);unclassified(100);unclassified(100);unclassified(100);unclassified(100);unclassified(100);                                                                                                                                              |
| 610 | 1 | 1 | 0 | 0 | Bacteria(100);Firmicutes(100);Bacilli(100);Lactobacillales(100);Streptococcaceae(100);Streptococcus(100);                                                                                                                                             |
| 611 | 1 | 1 | 0 | 0 | Bacteria(100);unclassified(100);unclassified(100);unclassified(100);unclassified(100);unclassified(100);                                                                                                                                              |
| 612 | 1 | 1 | 0 | 0 | Bacteria(100);"Actinobacteria"(100);Actinobacteria(100);Actinomycetales(100);Nocardiodaceae(100);unclassified(100);                                                                                                                                   |

|     |   |   |   |   |                                                                                                                                 |
|-----|---|---|---|---|---------------------------------------------------------------------------------------------------------------------------------|
| 613 | 1 | 1 | 0 | 0 | Bacteria(100);"Fusobacteria"(100);"Fusobacteria"(100);"Fusobacteriales"(100);"Leptotrichiaceae"(100);Leptotrichia(100);         |
| 614 | 2 | 1 | 1 | 0 | Bacteria(100);unclassified(100);unclassified(100);unclassified(100);unclassified(100);unclassified(100);                        |
| 615 | 1 | 1 | 0 | 0 | Bacteria(100);Firmicutes(100);Clostridia(100);Clostridiales(100);Clostridiales_Incertae_Sedis_XI(100);Anaerococcus(100);        |
| 616 | 1 | 1 | 0 | 0 | Bacteria(100);"Proteobacteria"(100);Gammaproteobacteria(100);Xanthomonadales(100);Xanthomonadaceae(100);Pseudoxanthomonas(100); |
| 617 | 1 | 1 | 0 | 0 | Bacteria(100);Firmicutes(100);Bacilli(100);Lactobacillales(100);unclassified(100);unclassified(100);                            |
| 618 | 1 | 1 | 0 | 0 | Bacteria(100);"Fusobacteria"(100);"Fusobacteria"(100);"Fusobacteriales"(100);"Fusobacteriaceae"(100);Fusobacterium(100);        |
| 619 | 1 | 1 | 0 | 0 | Bacteria(100);"Bacteroidetes"(100);Flavobacteria(100);"Flavobacteriales"(100);Flavobacteriaceae(100);Chryseobacterium(100);     |
| 620 | 1 | 1 | 0 | 0 | Bacteria(100);"Proteobacteria"(100);Alphaproteobacteria(100);Sphingomonadales(100);Sphingomonadaceae(100);unclassified(100);    |
| 621 | 1 | 1 | 0 | 0 | Bacteria(100);unclassified(100);unclassified(100);unclassified(100);unclassified(100);unclassified(100);                        |
| 622 | 1 | 1 | 0 | 0 | Bacteria(100);"Proteobacteria"(100);Gammaproteobacteria(100);Pseudomonadales(100);Pseudomonadaceae(100);unclassified(100);      |
| 623 | 1 | 1 | 0 | 0 | Bacteria(100);"Proteobacteria"(100);Gammaproteobacteria(100);unclassified(100);unclassified(100);unclassified(100);             |
| 624 | 1 | 1 | 0 | 0 | Bacteria(100);unclassified(100);unclassified(100);unclassified(100);unclassified(100);unclassified(100);                        |
| 625 | 1 | 1 | 0 | 0 | Bacteria(100);Firmicutes(100);Clostridia(100);Clostridiales(100);Peptostreptococcaceae(100);Clostridium_XI(100);                |
| 626 | 1 | 1 | 0 | 0 | Bacteria(100);"Fusobacteria"(100);"Fusobacteria"(100);"Fusobacteriales"(100);"Fusobacteriaceae"(100);unclassified(100);         |
| 627 | 1 | 1 | 0 | 0 | Bacteria(100);"Proteobacteria"(100);Betaproteobacteria(100);Burkholderiales(100);Alcaligenaceae(100);unclassified(100);         |
| 628 | 1 | 1 | 0 | 0 | Bacteria(100);"Proteobacteria"(100);Deltaproteobacteria(100);Myxococcales(100);Polyangiaceae(100);Chondromyces(100);            |
| 629 | 1 | 1 | 0 | 0 | Bacteria(100);unclassified(100);unclassified(100);unclassified(100);unclassified(100);unclassified(100);                        |
| 630 | 1 | 1 | 0 | 0 | Bacteria(100);Firmicutes(100);Clostridia(100);Clostridiales(100);unclassified(100);unclassified(100);                           |
| 631 | 1 | 1 | 0 | 0 | Bacteria(100);unclassified(100);unclassified(100);unclassified(100);unclassified(100);unclassified(100);                        |
| 632 | 1 | 1 | 0 | 0 | Bacteria(100);unclassified(100);unclassified(100);unclassified(100);unclassified(100);unclassified(100);                        |
| 633 | 1 | 1 | 0 | 0 | Bacteria(100);unclassified(100);unclassified(100);unclassified(100);unclassified(100);unclassified(100);                        |
| 634 | 2 | 2 | 0 | 0 | Bacteria(100);"Actinobacteria"(100);Actinobacteria(100);Actinomycetales(100);Nocardioideaceae(100);Marmoricola(100);            |
| 635 | 1 | 1 | 0 | 0 | Bacteria(100);"Proteobacteria"(100);Alphaproteobacteria(100);unclassified(100);unclassified(100);unclassified(100);             |
| 636 | 1 | 1 | 0 | 0 | Bacteria(100);"Proteobacteria"(100);Alphaproteobacteria(100);Rhodobacterales(100);Rhodobacteraceae(100);Haematobacter(100);     |
| 637 | 1 | 1 | 0 | 0 | Bacteria(100);"Actinobacteria"(100);Actinobacteria(100);Actinomycetales(100);unclassified(100);unclassified(100);               |
| 638 | 1 | 1 | 0 | 0 | Bacteria(100);unclassified(100);unclassified(100);unclassified(100);unclassified(100);unclassified(100);                        |

|     |   |   |   |   |                                                                                                                                                                                                                                             |
|-----|---|---|---|---|---------------------------------------------------------------------------------------------------------------------------------------------------------------------------------------------------------------------------------------------|
| 639 | 1 | 1 | 0 | 0 | Bacteria(100);"Proteobacteria"(100);Alphaproteobacteria(100);Sphingomonadales(100);unclassified(100);unclassified(100);                                                                                                                     |
| 640 | 1 | 1 | 0 | 0 | Bacteria(100);Firmicutes(100);Bacilli(100);Lactobacillales(100);Streptococcaceae(100);Streptococcus(100);                                                                                                                                   |
| 641 | 1 | 1 | 0 | 0 | Bacteria(100);unclassified(100);unclassified(100);unclassified(100);unclassified(100);unclassified(100);                                                                                                                                    |
| 642 | 1 | 1 | 0 | 0 | Bacteria(100);"Proteobacteria"(100);Alphaproteobacteria(100);unclassified(100);unclassified(100);unclassified(100);                                                                                                                         |
| 643 | 1 | 1 | 0 | 0 | Bacteria(100);unclassified(100);unclassified(100);unclassified(100);unclassified(100);unclassified(100);                                                                                                                                    |
| 644 | 1 | 1 | 0 | 0 | Bacteria(100);Firmicutes(100);Clostridia(100);Clostridiales(100);Ruminococcaceae(100);unclassified(100);<br>Bacteria(100);"Proteobacteria"(100);Alphaproteobacteria(100);Sphingomonadales(100);Sphingomonadaceae(100);Novosphingobiu        |
| 645 | 1 | 1 | 0 | 0 | m(100);                                                                                                                                                                                                                                     |
| 646 | 1 | 1 | 0 | 0 | Bacteria(100);"Proteobacteria"(100);Gammaproteobacteria(100);unclassified(100);unclassified(100);unclassified(100);<br>Bacteria(100);"Gemmatimonadetes"(100);Gemmatimonadetes(100);Gemmatimonadales(100);Gemmatimonadaceae(100);Gemmati     |
| 647 | 3 | 3 | 0 | 0 | monas(100);                                                                                                                                                                                                                                 |
| 648 | 1 | 1 | 0 | 0 | Bacteria(100);unclassified(100);unclassified(100);unclassified(100);unclassified(100);unclassified(100);                                                                                                                                    |
| 649 | 1 | 1 | 0 | 0 | Bacteria(100);unclassified(100);unclassified(100);unclassified(100);unclassified(100);unclassified(100);                                                                                                                                    |
| 650 | 1 | 1 | 0 | 0 | Bacteria(100);Firmicutes(100);Bacilli(100);Lactobacillales(100);Streptococcaceae(100);Streptococcus(100);                                                                                                                                   |
| 651 | 1 | 1 | 0 | 0 | Bacteria(100);Firmicutes(100);Clostridia(100);Clostridiales(100);unclassified(100);unclassified(100);                                                                                                                                       |
| 652 | 1 | 1 | 0 | 0 | Bacteria(100);unclassified(100);unclassified(100);unclassified(100);unclassified(100);unclassified(100);                                                                                                                                    |
| 653 | 1 | 1 | 0 | 0 | Bacteria(100);Firmicutes(100);Bacilli(100);Lactobacillales(100);Carnobacteriaceae(100);unclassified(100);<br>Bacteria(100);OD1(100);OD1_class_incertae_sedis(100);OD1_order_incertae_sedis(100);OD1_family_incertae_sedis(100);OD1_genu     |
| 654 | 1 | 1 | 0 | 0 | s_incertae_sedis(100);                                                                                                                                                                                                                      |
| 655 | 1 | 1 | 0 | 0 | Bacteria(100);unclassified(100);unclassified(100);unclassified(100);unclassified(100);unclassified(100);<br>Bacteria(100);"Verrucomicrobia"(100);Subdivision5(100);Subdivision5_order_incertae_sedis(100);Subdivision5_family_incertae_sedi |
| 656 | 2 | 2 | 0 | 0 | s(100);5_genus_incertae_sedis(100);                                                                                                                                                                                                         |
| 657 | 1 | 1 | 0 | 0 | Bacteria(100);"Actinobacteria"(100);Actinobacteria(100);Actinomycetales(100);unclassified(100);unclassified(100);                                                                                                                           |
| 658 | 1 | 1 | 0 | 0 | Bacteria(100);unclassified(100);unclassified(100);unclassified(100);unclassified(100);unclassified(100);                                                                                                                                    |
| 659 | 1 | 1 | 0 | 0 | Bacteria(100);"Proteobacteria"(100);Epsilonproteobacteria(100);Campylobacterales(100);Helicobacteraceae(100);Wolinella(100);                                                                                                                |
| 660 | 1 | 1 | 0 | 0 | Bacteria(100);unclassified(100);unclassified(100);unclassified(100);unclassified(100);unclassified(100);<br>Bacteria(100);"Acidobacteria"(100);Acidobacteria_Gp4(100);Acidobacteria_Gp4_order_incertae_sedis(100);Acidobacteria_Gp4_fami    |
| 661 | 1 | 1 | 0 | 0 | ly_incertae_sedis(100);Gp4(100);                                                                                                                                                                                                            |
| 662 | 1 | 1 | 0 | 0 | Bacteria(100);"Fusobacteria"(100);"Fusobacteria"(100);"Fusobacteriales"(100);"Fusobacteriaceae"(100);unclassified(100);                                                                                                                     |
| 663 | 1 | 1 | 0 | 0 | Bacteria(100);"Actinobacteria"(100);Actinobacteria(100);Actinomycetales(100);Propionibacteriaceae(100);Aestuariimicrobium(100);                                                                                                             |
| 664 | 1 | 1 | 0 | 0 | Bacteria(100);Firmicutes(100);Clostridia(100);Clostridiales(100);Clostridiales_Incertae_Sedis_XI(100);Anaerococcus(100);                                                                                                                    |
| 665 | 1 | 1 | 0 | 0 | Bacteria(100);unclassified(100);unclassified(100);unclassified(100);unclassified(100);unclassified(100);                                                                                                                                    |
| 666 | 1 | 1 | 0 | 0 | Bacteria(100);Firmicutes(100);Bacilli(100);Lactobacillales(100);unclassified(100);unclassified(100);                                                                                                                                        |

|     |   |   |   |   |                                                                                                                                                                                                                                                       |
|-----|---|---|---|---|-------------------------------------------------------------------------------------------------------------------------------------------------------------------------------------------------------------------------------------------------------|
| 667 | 1 | 1 | 0 | 0 | Bacteria(100);"Fusobacteria"(100);"Fusobacteria"(100);"Fusobacteriales"(100);"Fusobacteriaceae"(100);Fusobacterium(100);<br>Bacteria(100);"Proteobacteria"(100);Gammaproteobacteria(100);Pseudomonadales(100);Pseudomonadaceae(100);unclassified(100) |
| 668 | 1 | 1 | 0 | 0 | ;                                                                                                                                                                                                                                                     |
| 669 | 1 | 1 | 0 | 0 | Bacteria(100);unclassified(100);unclassified(100);unclassified(100);unclassified(100);unclassified(100);                                                                                                                                              |
| 670 | 1 | 1 | 0 | 0 | Bacteria(100);unclassified(100);unclassified(100);unclassified(100);unclassified(100);unclassified(100);                                                                                                                                              |
| 671 | 1 | 1 | 0 | 0 | Bacteria(100);"Actinobacteria"(100);Actinobacteria(100);Actinomycetales(100);Nocardiaceae(100);Rhodococcus(100);                                                                                                                                      |
| 672 | 1 | 1 | 0 | 0 | Bacteria(100);"Bacteroidetes"(100);"Bacteroidia"(100);"Bacteroidales"(100);"Prevotellaceae"(100);Prevotella(100);                                                                                                                                     |
| 673 | 1 | 1 | 0 | 0 | Bacteria(100);Firmicutes(100);Bacilli(100);unclassified(100);unclassified(100);unclassified(100);                                                                                                                                                     |
| 674 | 1 | 1 | 0 | 0 | Bacteria(100);"Fusobacteria"(100);"Fusobacteria"(100);"Fusobacteriales"(100);"Fusobacteriaceae"(100);Cetobacterium(100);                                                                                                                              |
| 675 | 1 | 1 | 0 | 0 | Bacteria(100);"Fusobacteria"(100);"Fusobacteria"(100);"Fusobacteriales"(100);"Fusobacteriaceae"(100);Fusobacterium(100);                                                                                                                              |
| 676 | 1 | 1 | 0 | 0 | Bacteria(100);Firmicutes(100);Negativicutes(100);Selenomonadales(100);Veillonellaceae(100);Veillonella(100);                                                                                                                                          |
| 677 | 1 | 1 | 0 | 0 | Bacteria(100);"Bacteroidetes"(100);Flavobacteria(100);"Flavobacteriales"(100);Flavobacteriaceae(100);Capnocytophaga(100);                                                                                                                             |
| 678 | 1 | 1 | 0 | 0 | Bacteria(100);"Proteobacteria"(100);Betaproteobacteria(100);Neisseriales(100);Neisseriaceae(100);unclassified(100);                                                                                                                                   |
| 679 | 1 | 1 | 0 | 0 | Bacteria(100);Firmicutes(100);Bacilli(100);Lactobacillales(100);Streptococcaceae(100);Streptococcus(100);                                                                                                                                             |
| 680 | 1 | 1 | 0 | 0 | Bacteria(100);Firmicutes(100);Clostridia(100);Clostridiales(100);Clostridiaceae_1(100);unclassified(100);                                                                                                                                             |
| 681 | 3 | 3 | 0 | 0 | Bacteria(100);Firmicutes(100);Bacilli(100);Lactobacillales(100);Carnobacteriaceae(100);unclassified(100);                                                                                                                                             |
| 682 | 1 | 1 | 0 | 0 | Bacteria(100);"Proteobacteria"(100);unclassified(100);unclassified(100);unclassified(100);unclassified(100);                                                                                                                                          |
| 683 | 1 | 1 | 0 | 0 | Bacteria(100);"Actinobacteria"(100);Actinobacteria(100);unclassified(100);unclassified(100);unclassified(100);                                                                                                                                        |
| 684 | 1 | 1 | 0 | 0 | Bacteria(100);"Fusobacteria"(100);"Fusobacteria"(100);"Fusobacteriales"(100);"Fusobacteriaceae"(100);unclassified(100);                                                                                                                               |
| 685 | 2 | 2 | 0 | 0 | Bacteria(100);Firmicutes(100);Bacilli(100);Lactobacillales(100);Streptococcaceae(100);Streptococcus(100);                                                                                                                                             |
| 686 | 1 | 1 | 0 | 0 | Bacteria(100);"Proteobacteria"(100);Betaproteobacteria(100);Neisseriales(100);Neisseriaceae(100);unclassified(100);                                                                                                                                   |
| 687 | 1 | 1 | 0 | 0 | Bacteria(100);unclassified(100);unclassified(100);unclassified(100);unclassified(100);unclassified(100);                                                                                                                                              |
| 688 | 1 | 1 | 0 | 0 | Bacteria(100);"Proteobacteria"(100);unclassified(100);unclassified(100);unclassified(100);unclassified(100);                                                                                                                                          |
| 689 | 1 | 1 | 0 | 0 | Bacteria(100);"Bacteroidetes"(100);"Sphingobacteria"(100);"Sphingobacteriales"(100);Cytophagaceae(100);Hymenobacter(100);                                                                                                                             |
| 690 | 1 | 1 | 0 | 0 | Bacteria(100);Firmicutes(100);Bacilli(100);Lactobacillales(100);Carnobacteriaceae(100);Catellicoccus(100);                                                                                                                                            |
| 691 | 1 | 1 | 0 | 0 | Bacteria(100);unclassified(100);unclassified(100);unclassified(100);unclassified(100);unclassified(100);                                                                                                                                              |
| 692 | 1 | 1 | 0 | 0 | Bacteria(100);unclassified(100);unclassified(100);unclassified(100);unclassified(100);unclassified(100);                                                                                                                                              |
| 693 | 1 | 1 | 0 | 0 | Bacteria(100);"Proteobacteria"(100);Gammaproteobacteria(100);Legionellales(100);Legionellaceae(100);Legionella(100);                                                                                                                                  |
| 694 | 1 | 1 | 0 | 0 | Bacteria(100);"Actinobacteria"(100);Actinobacteria(100);Actinomycetales(100);unclassified(100);unclassified(100);                                                                                                                                     |
| 695 | 2 | 2 | 0 | 0 | Bacteria(100);unclassified(100);unclassified(100);unclassified(100);unclassified(100);unclassified(100);                                                                                                                                              |

|     |   |   |   |   |                                                                                                                                                                                                                                       |
|-----|---|---|---|---|---------------------------------------------------------------------------------------------------------------------------------------------------------------------------------------------------------------------------------------|
| 696 | 1 | 1 | 0 | 0 | Bacteria(100);unclassified(100);unclassified(100);unclassified(100);unclassified(100);unclassified(100);                                                                                                                              |
| 697 | 1 | 1 | 0 | 0 | Bacteria(100);"Proteobacteria"(100);Alphaproteobacteria(100);Rhizobiales(100);unclassified(100);unclassified(100);                                                                                                                    |
| 698 | 1 | 1 | 0 | 0 | Bacteria(100);unclassified(100);unclassified(100);unclassified(100);unclassified(100);unclassified(100);<br>Bacteria(100);"Proteobacteria"(100);Alphaproteobacteria(100);Sphingomonadales(100);Sphingomonadaceae(100);Sphingobium(100 |
| 699 | 1 | 1 | 0 | 0 | );                                                                                                                                                                                                                                    |
| 700 | 1 | 1 | 0 | 0 | Bacteria(100);"Proteobacteria"(100);Gammaproteobacteria(100);unclassified(100);unclassified(100);unclassified(100);                                                                                                                   |
| 701 | 2 | 2 | 0 | 0 | Bacteria(100);"Proteobacteria"(100);Betaproteobacteria(100);Burkholderiales(100);Sutterellaceae(100);Sutterella(100);                                                                                                                 |
| 702 | 1 | 1 | 0 | 0 | Bacteria(100);"Actinobacteria"(100);Actinobacteria(100);Actinomycetales(100);unclassified(100);unclassified(100);                                                                                                                     |
| 703 | 1 | 1 | 0 | 0 | Bacteria(100);unclassified(100);unclassified(100);unclassified(100);unclassified(100);unclassified(100);                                                                                                                              |
| 704 | 1 | 1 | 0 | 0 | Bacteria(100);"Bacteroidetes"(100);"Bacteroidia"(100);"Bacteroidales"(100);"Prevotellaceae"(100);Prevotella(100);                                                                                                                     |
| 705 | 1 | 1 | 0 | 0 | Bacteria(100);"Fusobacteria"(100);"Fusobacteria"(100);"Fusobacteriales"(100);"Leptotrichiaceae"(100);unclassified(100);                                                                                                               |
| 706 | 1 | 1 | 0 | 0 | Bacteria(100);"Proteobacteria"(100);Betaproteobacteria(100);Neisseriales(100);Neisseriaceae(100);Neisseria(100);                                                                                                                      |
| 707 | 1 | 1 | 0 | 0 | Bacteria(100);"Actinobacteria"(100);Actinobacteria(100);Actinomycetales(100);unclassified(100);unclassified(100);                                                                                                                     |
| 708 | 1 | 1 | 0 | 0 | Bacteria(100);"Fusobacteria"(100);"Fusobacteria"(100);"Fusobacteriales"(100);"Fusobacteriaceae"(100);Cetobacterium(100);                                                                                                              |
| 709 | 1 | 1 | 0 | 0 | Bacteria(100);"Proteobacteria"(100);Betaproteobacteria(100);Neisseriales(100);Neisseriaceae(100);unclassified(100);                                                                                                                   |
| 710 | 1 | 1 | 0 | 0 | Bacteria(100);Firmicutes(100);Bacilli(100);Lactobacillales(100);Lactobacillaceae(100);Lactobacillus(100);                                                                                                                             |
| 711 | 1 | 1 | 0 | 0 | Bacteria(100);"Proteobacteria"(100);Betaproteobacteria(100);Neisseriales(100);Neisseriaceae(100);unclassified(100);                                                                                                                   |
| 712 | 1 | 1 | 0 | 0 | Bacteria(100);"Fusobacteria"(100);"Fusobacteria"(100);"Fusobacteriales"(100);"Fusobacteriaceae"(100);Fusobacterium(100);                                                                                                              |
| 713 | 1 | 1 | 0 | 0 | Bacteria(100);unclassified(100);unclassified(100);unclassified(100);unclassified(100);unclassified(100);                                                                                                                              |
| 714 | 1 | 1 | 0 | 0 | Bacteria(100);"Proteobacteria"(100);Gammaproteobacteria(100);Chromatiales(100);Halothiobacillaceae(100);Thiofaba(100);                                                                                                                |
| 715 | 1 | 1 | 0 | 0 | Bacteria(100);Firmicutes(100);Bacilli(100);Lactobacillales(100);Streptococcaceae(100);Streptococcus(100);                                                                                                                             |
| 716 | 1 | 1 | 0 | 0 | Bacteria(100);unclassified(100);unclassified(100);unclassified(100);unclassified(100);unclassified(100);                                                                                                                              |
| 717 | 1 | 1 | 0 | 0 | Bacteria(100);Firmicutes(100);Bacilli(100);Lactobacillales(100);unclassified(100);unclassified(100);                                                                                                                                  |
| 718 | 1 | 1 | 0 | 0 | Bacteria(100);Firmicutes(100);Bacilli(100);Lactobacillales(100);Streptococcaceae(100);Streptococcus(100);                                                                                                                             |
| 719 | 1 | 1 | 0 | 0 | Bacteria(100);unclassified(100);unclassified(100);unclassified(100);unclassified(100);unclassified(100);                                                                                                                              |
| 720 | 1 | 1 | 0 | 0 | Bacteria(100);unclassified(100);unclassified(100);unclassified(100);unclassified(100);unclassified(100);                                                                                                                              |
| 721 | 1 | 1 | 0 | 0 | Bacteria(100);"Fusobacteria"(100);"Fusobacteria"(100);"Fusobacteriales"(100);"Leptotrichiaceae"(100);Leptotrichia(100);                                                                                                               |
| 722 | 1 | 1 | 0 | 0 | Bacteria(100);unclassified(100);unclassified(100);unclassified(100);unclassified(100);unclassified(100);                                                                                                                              |
| 723 | 2 | 2 | 0 | 0 | Bacteria(100);"Bacteroidetes"(100);"Bacteroidia"(100);"Bacteroidales"(100);Bacteroidaceae(100);Bacteroides(100);                                                                                                                      |
| 724 | 1 | 1 | 0 | 0 | Bacteria(100);"Fusobacteria"(100);"Fusobacteria"(100);"Fusobacteriales"(100);"Fusobacteriaceae"(100);unclassified(100);                                                                                                               |
| 725 | 1 | 1 | 0 | 0 | Bacteria(100);unclassified(100);unclassified(100);unclassified(100);unclassified(100);unclassified(100);                                                                                                                              |

|     |   |   |   |   |                                                                                                                                                                                                                                                   |
|-----|---|---|---|---|---------------------------------------------------------------------------------------------------------------------------------------------------------------------------------------------------------------------------------------------------|
| 726 | 2 | 2 | 0 | 0 | Bacteria(100);unclassified(100);unclassified(100);unclassified(100);unclassified(100);unclassified(100);                                                                                                                                          |
| 727 | 1 | 1 | 0 | 0 | Bacteria(100);Firmicutes(100);Bacilli(100);Bacillales(100);Staphylococcaceae(100);unclassified(100);                                                                                                                                              |
| 728 | 1 | 1 | 0 | 0 | Bacteria(100);"Actinobacteria"(100);Actinobacteria(100);Actinomycetales(100);Actinomycetaceae(100);Actinomyces(100);                                                                                                                              |
| 729 | 1 | 1 | 0 | 0 | Bacteria(100);Firmicutes(100);Negativicutes(100);Selenomonadales(100);Veillonellaceae(100);Veillonella(100);                                                                                                                                      |
| 730 | 1 | 1 | 0 | 0 | Bacteria(100);unclassified(100);unclassified(100);unclassified(100);unclassified(100);unclassified(100);                                                                                                                                          |
| 731 | 1 | 1 | 0 | 0 | Bacteria(100);"Proteobacteria"(100);Gammaproteobacteria(100);Xanthomonadales(100);Xanthomonadaceae(100);Frateuria(100);                                                                                                                           |
| 732 | 1 | 1 | 0 | 0 | Bacteria(100);"Fusobacteria"(100);"Fusobacteria"(100);"Fusobacteriales"(100);"Fusobacteriaceae"(100);Fusobacterium(100);                                                                                                                          |
| 733 | 1 | 1 | 0 | 0 | Bacteria(100);Firmicutes(100);Bacilli(100);Lactobacillales(100);Streptococcaceae(100);Streptococcus(100);                                                                                                                                         |
| 734 | 1 | 1 | 0 | 0 | Bacteria(100);Firmicutes(100);Clostridia(100);Clostridiales(100);unclassified(100);unclassified(100);                                                                                                                                             |
| 735 | 1 | 1 | 0 | 0 | Bacteria(100);"Proteobacteria"(100);Gammaproteobacteria(100);Pseudomonadales(100);Moraxellaceae(100);Acinetobacter(100);                                                                                                                          |
| 736 | 1 | 1 | 0 | 0 | Bacteria(100);Firmicutes(100);Clostridia(100);Clostridiales(100);unclassified(100);unclassified(100);                                                                                                                                             |
| 737 | 1 | 1 | 0 | 0 | Bacteria(100);"Proteobacteria"(100);Betaproteobacteria(100);Neisseriales(100);Neisseriaceae(100);unclassified(100);<br>Bacteria(100);OD1(100);OD1_class_incertae_sedis(100);OD1_order_incertae_sedis(100);OD1_family_incertae_sedis(100);OD1_genu |
| 738 | 2 | 2 | 0 | 0 | s_incertae_sedis(100);                                                                                                                                                                                                                            |
| 739 | 2 | 2 | 0 | 0 | Bacteria(100);"Proteobacteria"(100);Alphaproteobacteria(100);Rhizobiales(100);unclassified(100);unclassified(100);                                                                                                                                |
| 740 | 1 | 1 | 0 | 0 | Bacteria(100);Firmicutes(100);Bacilli(100);Bacillales(100);Staphylococcaceae(100);Staphylococcus(100);                                                                                                                                            |
| 741 | 1 | 1 | 0 | 0 | Bacteria(100);unclassified(100);unclassified(100);unclassified(100);unclassified(100);unclassified(100);<br>Bacteria(100);"Proteobacteria"(100);Gammaproteobacteria(100);"Enterobacteriales"(100);Enterobacteriaceae(100);unclassified(100        |
| 742 | 2 | 2 | 0 | 0 | );                                                                                                                                                                                                                                                |
| 743 | 1 | 1 | 0 | 0 | Bacteria(100);unclassified(100);unclassified(100);unclassified(100);unclassified(100);unclassified(100);                                                                                                                                          |
| 744 | 1 | 1 | 0 | 0 | Bacteria(100);unclassified(100);unclassified(100);unclassified(100);unclassified(100);unclassified(100);<br>Bacteria(100);"Verrucomicrobia"(100);Verrucomicrobiae(100);Verrucomicrobiales(100);Verrucomicrobiaceae(100);Prostheco bacter(         |
| 745 | 1 | 1 | 0 | 0 | 100);                                                                                                                                                                                                                                             |
| 746 | 1 | 1 | 0 | 0 | Bacteria(100);"Proteobacteria"(100);Alphaproteobacteria(100);Rhizobiales(100);"Aurantimonadaceae"(100);Aurantimonas(100);                                                                                                                         |
| 747 | 1 | 1 | 0 | 0 | Bacteria(100);unclassified(100);unclassified(100);unclassified(100);unclassified(100);unclassified(100);                                                                                                                                          |
| 748 | 1 | 1 | 0 | 0 | Bacteria(100);unclassified(100);unclassified(100);unclassified(100);unclassified(100);unclassified(100);                                                                                                                                          |
| 749 | 1 | 1 | 0 | 0 | Bacteria(100);unclassified(100);unclassified(100);unclassified(100);unclassified(100);unclassified(100);                                                                                                                                          |
| 750 | 1 | 1 | 0 | 0 | Bacteria(100);unclassified(100);unclassified(100);unclassified(100);unclassified(100);unclassified(100);                                                                                                                                          |
| 751 | 1 | 1 | 0 | 0 | Bacteria(100);"Proteobacteria"(100);Alphaproteobacteria(100);unclassified(100);unclassified(100);unclassified(100);                                                                                                                               |
| 752 | 1 | 1 | 0 | 0 | Bacteria(100);unclassified(100);unclassified(100);unclassified(100);unclassified(100);unclassified(100);                                                                                                                                          |
| 753 | 1 | 1 | 0 | 0 | Bacteria(100);unclassified(100);unclassified(100);unclassified(100);unclassified(100);unclassified(100);                                                                                                                                          |
| 754 | 1 | 1 | 0 | 0 | Bacteria(100);Firmicutes(100);Clostridia(100);Clostridiales(100);Clostridiaceae_1(100);unclassified(100);                                                                                                                                         |

|     |   |   |   |   |                                                                                                                                                                                                                                                     |
|-----|---|---|---|---|-----------------------------------------------------------------------------------------------------------------------------------------------------------------------------------------------------------------------------------------------------|
| 755 | 1 | 1 | 0 | 0 | Bacteria(100);Firmicutes(100);Clostridia(100);Clostridiales(100);Peptostreptococcaceae(100);unclassified(100);                                                                                                                                      |
| 756 | 1 | 1 | 0 | 0 | Bacteria(100);unclassified(100);unclassified(100);unclassified(100);unclassified(100);unclassified(100);                                                                                                                                            |
| 757 | 1 | 1 | 0 | 0 | Bacteria(100);unclassified(100);unclassified(100);unclassified(100);unclassified(100);unclassified(100);                                                                                                                                            |
| 758 | 1 | 1 | 0 | 0 | Bacteria(100);unclassified(100);unclassified(100);unclassified(100);unclassified(100);unclassified(100);                                                                                                                                            |
| 759 | 1 | 1 | 0 | 0 | Bacteria(100);Firmicutes(100);Clostridia(100);Clostridiales(100);Lachnospiraceae(100);unclassified(100);                                                                                                                                            |
| 760 | 1 | 1 | 0 | 0 | Bacteria(100);unclassified(100);unclassified(100);unclassified(100);unclassified(100);unclassified(100);                                                                                                                                            |
| 761 | 1 | 1 | 0 | 0 | Bacteria(100);unclassified(100);unclassified(100);unclassified(100);unclassified(100);unclassified(100);                                                                                                                                            |
| 762 | 1 | 1 | 0 | 0 | Bacteria(100);unclassified(100);unclassified(100);unclassified(100);unclassified(100);unclassified(100);                                                                                                                                            |
| 763 | 1 | 1 | 0 | 0 | Bacteria(100);unclassified(100);unclassified(100);unclassified(100);unclassified(100);unclassified(100);                                                                                                                                            |
| 764 | 1 | 1 | 0 | 0 | Bacteria(100);"Actinobacteria"(100);Actinobacteria(100);Actinomycetales(100);Dermabacteraceae(100);unclassified(100);                                                                                                                               |
| 765 | 1 | 1 | 0 | 0 | Bacteria(100);Firmicutes(100);Bacilli(100);Lactobacillales(100);Streptococcaceae(100);Streptococcus(100);                                                                                                                                           |
| 766 | 1 | 1 | 0 | 0 | Bacteria(100);Firmicutes(100);unclassified(100);unclassified(100);unclassified(100);unclassified(100);                                                                                                                                              |
| 767 | 1 | 1 | 0 | 0 | Bacteria(100);"Fusobacteria"(100);"Fusobacteria"(100);"Fusobacteriales"(100);"Fusobacteriaceae"(100);Fusobacterium(100);                                                                                                                            |
| 768 | 1 | 1 | 0 | 0 | Bacteria(100);"Bacteroidetes"(100);Flavobacteria(100);"Flavobacteriales"(100);Flavobacteriaceae(100);Capnocytophaga(100);                                                                                                                           |
| 769 | 1 | 1 | 0 | 0 | Bacteria(100);unclassified(100);unclassified(100);unclassified(100);unclassified(100);unclassified(100);                                                                                                                                            |
| 770 | 1 | 1 | 0 | 0 | Bacteria(100);"Proteobacteria"(100);Betaproteobacteria(100);unclassified(100);unclassified(100);unclassified(100);<br>Bacteria(100);"Proteobacteria"(100);Alphaproteobacteria(100);Sphingomonadales(100);Erythrobacteraceae(100);Erythrobacter(100) |
| 771 | 1 | 1 | 0 | 0 | ;                                                                                                                                                                                                                                                   |
| 772 | 2 | 2 | 0 | 0 | Bacteria(100);"Actinobacteria"(100);Actinobacteria(100);Actinomycetales(100);Microbacteriaceae(100);Rathayibacter(100);                                                                                                                             |
| 773 | 1 | 1 | 0 | 0 | Bacteria(100);"Actinobacteria"(100);Actinobacteria(100);Actinomycetales(100);Micrococcaceae(100);Rothia(100);                                                                                                                                       |
| 774 | 1 | 1 | 0 | 0 | Bacteria(100);"Actinobacteria"(100);Actinobacteria(100);Actinomycetales(100);Pseudonocardaceae(100);unclassified(100);                                                                                                                              |
| 775 | 5 | 5 | 0 | 0 | Bacteria(100);Firmicutes(100);Erysipelotrichia(100);Erysipelotrichales(100);Erysipelotrichaceae(100);Catenibacterium(100);                                                                                                                          |
| 776 | 1 | 1 | 0 | 0 | Bacteria(100);"Actinobacteria"(100);Actinobacteria(100);Actinomycetales(100);Micrococcaceae(100);Rothia(100);                                                                                                                                       |
| 777 | 1 | 1 | 0 | 0 | Bacteria(100);Firmicutes(100);Bacilli(100);Lactobacillales(100);Streptococcaceae(100);Streptococcus(100);                                                                                                                                           |
| 778 | 1 | 1 | 0 | 0 | Bacteria(100);"Fusobacteria"(100);"Fusobacteria"(100);"Fusobacteriales"(100);"Fusobacteriaceae"(100);Fusobacterium(100);                                                                                                                            |
| 779 | 1 | 1 | 0 | 0 | Bacteria(100);unclassified(100);unclassified(100);unclassified(100);unclassified(100);unclassified(100);                                                                                                                                            |
| 780 | 1 | 1 | 0 | 0 | Bacteria(100);Firmicutes(100);Bacilli(100);Lactobacillales(100);unclassified(100);unclassified(100);                                                                                                                                                |
| 781 | 1 | 1 | 0 | 0 | Bacteria(100);unclassified(100);unclassified(100);unclassified(100);unclassified(100);unclassified(100);                                                                                                                                            |
| 782 | 1 | 1 | 0 | 0 | Bacteria(100);Firmicutes(100);Negativicutes(100);Selenomonadales(100);Veillonellaceae(100);unclassified(100);                                                                                                                                       |
| 783 | 1 | 1 | 0 | 0 | Bacteria(100);unclassified(100);unclassified(100);unclassified(100);unclassified(100);unclassified(100);                                                                                                                                            |



|     |   |   |   |   |                                                                                                                                                  |
|-----|---|---|---|---|--------------------------------------------------------------------------------------------------------------------------------------------------|
| 784 | 1 | 1 | 0 | 0 | Bacteria(100);"Proteobacteria"(100);Betaproteobacteria(100);Neisseriales(100);Neisseriaceae(100);unclassified(100);                              |
| 785 | 1 | 1 | 0 | 0 | Bacteria(100);"Proteobacteria"(100);unclassified(100);unclassified(100);unclassified(100);unclassified(100);                                     |
| 786 | 1 | 1 | 0 | 0 | Bacteria(100);Firmicutes(100);Bacilli(100);Lactobacillales(100);Carnobacteriaceae(100);unclassified(100);                                        |
| 787 | 1 | 1 | 0 | 0 | Bacteria(100);"Fusobacteria"(100);"Fusobacteria"(100);"Fusobacteriales"(100);"Fusobacteriaceae"(100);unclassified(100);                          |
| 788 | 1 | 1 | 0 | 0 | Bacteria(100);"Actinobacteria"(100);Actinobacteria(100);Actinomycetales(100);Microbacteriaceae(100);Leucobacter(100);                            |
| 789 | 1 | 1 | 0 | 0 | Bacteria(100);"Fusobacteria"(100);"Fusobacteria"(100);"Fusobacteriales"(100);"Leptotrichiaceae"(100);Leptotrichia(100);                          |
| 790 | 1 | 1 | 0 | 0 | Bacteria(100);Firmicutes(100);Bacilli(100);Lactobacillales(100);Streptococcaceae(100);Streptococcus(100);                                        |
| 791 | 1 | 1 | 0 | 0 | Bacteria(100);unclassified(100);unclassified(100);unclassified(100);unclassified(100);unclassified(100);                                         |
| 792 | 1 | 1 | 0 | 0 | Bacteria(100);unclassified(100);unclassified(100);unclassified(100);unclassified(100);unclassified(100);                                         |
| 793 | 1 | 1 | 0 | 0 | Bacteria(100);"Bacteroidetes"(100);"Bacteroidia"(100);"Bacteroidales"(100);"Prevotellaceae"(100);Prevotella(100);                                |
| 794 | 4 | 4 | 0 | 0 | Bacteria(100);TM7(100);TM7_class_incertae_sedis(100);TM7_order_incertae_sedis(100);TM7_family_incertae_sedis(100);TM7_genus_incertae_sedis(100); |
| 795 | 1 | 1 | 0 | 0 | Bacteria(100);unclassified(100);unclassified(100);unclassified(100);unclassified(100);unclassified(100);                                         |
| 796 | 1 | 1 | 0 | 0 | Bacteria(100);"Actinobacteria"(100);Actinobacteria(100);Actinomycetales(100);unclassified(100);unclassified(100);                                |
| 797 | 1 | 1 | 0 | 0 | Bacteria(100);unclassified(100);unclassified(100);unclassified(100);unclassified(100);unclassified(100);                                         |
| 798 | 1 | 1 | 0 | 0 | Bacteria(100);unclassified(100);unclassified(100);unclassified(100);unclassified(100);unclassified(100);                                         |
| 799 | 1 | 1 | 0 | 0 | Bacteria(100);"Proteobacteria"(100);Gammaproteobacteria(100);"Enterobacteriales"(100);Enterobacteriaceae(100);unclassified(100);                 |
| 800 | 1 | 1 | 0 | 0 | Bacteria(100);Firmicutes(100);Bacilli(100);Lactobacillales(100);Streptococcaceae(100);Streptococcus(100);                                        |
| 801 | 7 | 2 | 0 | 5 | Bacteria(100);"Actinobacteria"(100);Actinobacteria(100);Actinomycetales(100);Nocardiodaceae(100);Nocardioideae(100);                             |
| 802 | 1 | 1 | 0 | 0 | Bacteria(100);Firmicutes(100);Bacilli(100);unclassified(100);unclassified(100);unclassified(100);                                                |
| 803 | 1 | 1 | 0 | 0 | Bacteria(100);Firmicutes(100);Clostridia(100);Clostridiales(100);unclassified(100);unclassified(100);                                            |
| 804 | 1 | 1 | 0 | 0 | Bacteria(100);Firmicutes(100);Bacilli(100);Lactobacillales(100);unclassified(100);unclassified(100);                                             |
| 805 | 1 | 1 | 0 | 0 | Bacteria(100);"Fusobacteria"(100);"Fusobacteria"(100);"Fusobacteriales"(100);"Fusobacteriaceae"(100);Fusobacterium(100);                         |
| 806 | 1 | 1 | 0 | 0 | Bacteria(100);unclassified(100);unclassified(100);unclassified(100);unclassified(100);unclassified(100);                                         |
| 807 | 1 | 1 | 0 | 0 | Bacteria(100);"Proteobacteria"(100);Betaproteobacteria(100);Neisseriales(100);Neisseriaceae(100);Neisseria(100);                                 |
| 808 | 1 | 1 | 0 | 0 | Bacteria(100);"Actinobacteria"(100);Actinobacteria(100);Bifidobacteriales(100);Bifidobacteriaceae(100);Gardnerella(100);                         |
| 809 | 1 | 1 | 0 | 0 | Bacteria(100);unclassified(100);unclassified(100);unclassified(100);unclassified(100);unclassified(100);                                         |
| 810 | 1 | 1 | 0 | 0 | Bacteria(100);unclassified(100);unclassified(100);unclassified(100);unclassified(100);unclassified(100);                                         |
| 811 | 1 | 1 | 0 | 0 | Bacteria(100);unclassified(100);unclassified(100);unclassified(100);unclassified(100);unclassified(100);                                         |
| 812 | 1 | 1 | 0 | 0 | Bacteria(100);"Proteobacteria"(100);Gammaproteobacteria(100);unclassified(100);unclassified(100);unclassified(100);                              |

|     |   |   |   |   |                                                                                                                                                                                                                                                |
|-----|---|---|---|---|------------------------------------------------------------------------------------------------------------------------------------------------------------------------------------------------------------------------------------------------|
| 813 | 2 | 2 | 0 | 0 | Bacteria(100);"Actinobacteria"(100);Actinobacteria(100);Actinomycetales(100);unclassified(100);unclassified(100);                                                                                                                              |
| 814 | 1 | 1 | 0 | 0 | Bacteria(100);"Proteobacteria"(100);Gammaproteobacteria(100);Pseudomonadales(100);Pseudomonadaceae(100);Cellvibrio(100);                                                                                                                       |
| 815 | 1 | 1 | 0 | 0 | Bacteria(100);unclassified(100);unclassified(100);unclassified(100);unclassified(100);unclassified(100);                                                                                                                                       |
| 816 | 1 | 1 | 0 | 0 | Bacteria(100);Firmicutes(100);unclassified(100);unclassified(100);unclassified(100);unclassified(100);                                                                                                                                         |
| 817 | 1 | 1 | 0 | 0 | Bacteria(100);unclassified(100);unclassified(100);unclassified(100);unclassified(100);unclassified(100);                                                                                                                                       |
| 818 | 1 | 1 | 0 | 0 | Bacteria(100);"Proteobacteria"(100);Betaproteobacteria(100);Neisseriales(100);Neisseriaceae(100);unclassified(100);                                                                                                                            |
| 819 | 1 | 1 | 0 | 0 | Bacteria(100);unclassified(100);unclassified(100);unclassified(100);unclassified(100);unclassified(100);                                                                                                                                       |
| 820 | 1 | 1 | 0 | 0 | Bacteria(100);unclassified(100);unclassified(100);unclassified(100);unclassified(100);unclassified(100);                                                                                                                                       |
| 821 | 1 | 1 | 0 | 0 | Bacteria(100);"Bacteroidetes"(100);"Sphingobacteria"(100);"Sphingobacteriales"(100);Chitinophagaceae(100);unclassified(100);                                                                                                                   |
| 822 | 1 | 1 | 0 | 0 | Bacteria(100);unclassified(100);unclassified(100);unclassified(100);unclassified(100);unclassified(100);<br>Bacteria(100);"Proteobacteria"(100);Gammaproteobacteria(100);Pseudomonadales(100);Pseudomonadaceae(100);unclassified(100)          |
| 823 | 1 | 1 | 0 | 0 | ;                                                                                                                                                                                                                                              |
| 824 | 1 | 1 | 0 | 0 | Bacteria(100);"Fusobacteria"(100);"Fusobacteria"(100);"Fusobacteriales"(100);"Fusobacteriaceae"(100);unclassified(100);                                                                                                                        |
| 825 | 1 | 1 | 0 | 0 | Bacteria(100);Firmicutes(100);Bacilli(100);Lactobacillales(100);Streptococcaceae(100);Streptococcus(100);                                                                                                                                      |
| 826 | 3 | 3 | 0 | 0 | Bacteria(100);unclassified(100);unclassified(100);unclassified(100);unclassified(100);unclassified(100);                                                                                                                                       |
| 827 | 1 | 1 | 0 | 0 | Bacteria(100);"Bacteroidetes"(100);"Bacteroidia"(100);"Bacteroidales"(100);"Prevotellaceae"(100);unclassified(100);                                                                                                                            |
| 828 | 1 | 1 | 0 | 0 | Bacteria(100);unclassified(100);unclassified(100);unclassified(100);unclassified(100);unclassified(100);                                                                                                                                       |
| 829 | 1 | 1 | 0 | 0 | Bacteria(100);Firmicutes(100);Clostridia(100);Clostridiales(100);Peptostreptococcaceae(100);unclassified(100);<br>Bacteria(100);"Proteobacteria"(100);Epsilonproteobacteria(100);Campylobacterales(100);Campylobacteraceae(100);Campylobacter( |
| 830 | 2 | 2 | 0 | 0 | 100);                                                                                                                                                                                                                                          |
| 831 | 2 | 2 | 0 | 0 | Bacteria(100);unclassified(100);unclassified(100);unclassified(100);unclassified(100);unclassified(100);                                                                                                                                       |
| 832 | 1 | 1 | 0 | 0 | Bacteria(100);unclassified(100);unclassified(100);unclassified(100);unclassified(100);unclassified(100);                                                                                                                                       |
| 833 | 1 | 1 | 0 | 0 | Bacteria(100);Firmicutes(100);Bacilli(100);Bacillales(100);Staphylococcaceae(100);Staphylococcus(100);                                                                                                                                         |
| 834 | 1 | 1 | 0 | 0 | Bacteria(100);unclassified(100);unclassified(100);unclassified(100);unclassified(100);unclassified(100);                                                                                                                                       |
| 835 | 1 | 1 | 0 | 0 | Bacteria(100);Firmicutes(100);Bacilli(100);unclassified(100);unclassified(100);unclassified(100);                                                                                                                                              |
| 836 | 1 | 1 | 0 | 0 | Bacteria(100);unclassified(100);unclassified(100);unclassified(100);unclassified(100);unclassified(100);                                                                                                                                       |
| 837 | 1 | 1 | 0 | 0 | Bacteria(100);"Proteobacteria"(100);Betaproteobacteria(100);Neisseriales(100);Neisseriaceae(100);unclassified(100);                                                                                                                            |
| 838 | 1 | 1 | 0 | 0 | Bacteria(100);unclassified(100);unclassified(100);unclassified(100);unclassified(100);unclassified(100);                                                                                                                                       |
| 839 | 1 | 1 | 0 | 0 | Bacteria(100);Firmicutes(100);Bacilli(100);Lactobacillales(100);unclassified(100);unclassified(100);                                                                                                                                           |
| 840 | 1 | 1 | 0 | 0 | Bacteria(100);Firmicutes(100);unclassified(100);unclassified(100);unclassified(100);unclassified(100);                                                                                                                                         |
| 841 | 1 | 1 | 0 | 0 | Bacteria(100);"Proteobacteria"(100);Alphaproteobacteria(100);Sphingomonadales(100);unclassified(100);unclassified(100);                                                                                                                        |
| 842 | 1 | 1 | 0 | 0 | Bacteria(100);"Actinobacteria"(100);Actinobacteria(100);Actinomycetales(100);unclassified(100);unclassified(100);                                                                                                                              |

|     |   |   |   |   |                                                                                                                                         |
|-----|---|---|---|---|-----------------------------------------------------------------------------------------------------------------------------------------|
| 843 | 1 | 1 | 0 | 0 | Bacteria(100);"Proteobacteria"(100);Alphaproteobacteria(100);Sphingomonadales(100);Erythrobacteraceae(100);unclassified(100);           |
| 844 | 1 | 1 | 0 | 0 | Bacteria(100);Firmicutes(100);Clostridia(100);Clostridiales(100);Clostridiaceae_1(100);unclassified(100);                               |
| 845 | 1 | 1 | 0 | 0 | Bacteria(100);"Actinobacteria"(100);Actinobacteria(100);Acidimicrobiales(100);unclassified(100);unclassified(100);                      |
| 846 | 1 | 1 | 0 | 0 | Bacteria(100);unclassified(100);unclassified(100);unclassified(100);unclassified(100);unclassified(100);                                |
| 847 | 1 | 1 | 0 | 0 | Bacteria(100);Firmicutes(100);Bacilli(100);Lactobacillales(100);unclassified(100);unclassified(100);                                    |
| 848 | 1 | 1 | 0 | 0 | Bacteria(100);"Proteobacteria"(100);Gammaproteobacteria(100);Cardiobacteriales(100);Cardiobacteriaceae(100);Cardiobacterium(100);       |
| 849 | 1 | 1 | 0 | 0 | Bacteria(100);Firmicutes(100);Clostridia(100);Clostridiales(100);unclassified(100);unclassified(100);                                   |
| 850 | 1 | 1 | 0 | 0 | Bacteria(100);unclassified(100);unclassified(100);unclassified(100);unclassified(100);unclassified(100);                                |
| 851 | 1 | 1 | 0 | 0 | Bacteria(100);"Actinobacteria"(100);Actinobacteria(100);Actinomycetales(100);Micrococcaceae(100);Rothia(100);                           |
| 852 | 1 | 1 | 0 | 0 | Bacteria(100);"Fusobacteria"(100);"Fusobacteria"(100);"Fusobacteriales"(100);"Leptotrichiaceae"(100);Leptotrichia(100);                 |
| 853 | 1 | 1 | 0 | 0 | Bacteria(100);"Actinobacteria"(100);Actinobacteria(100);Coriobacteriales(100);Coriobacteriaceae(100);Atopobium(100);                    |
| 854 | 1 | 1 | 0 | 0 | Bacteria(100);"Proteobacteria"(100);Alphaproteobacteria(100);Rhizobiales(100);unclassified(100);unclassified(100);                      |
| 855 | 1 | 1 | 0 | 0 | Bacteria(100);"Proteobacteria"(100);Betaproteobacteria(100);Neisseriales(100);Neisseriaceae(100);unclassified(100);                     |
| 856 | 1 | 1 | 0 | 0 | Bacteria(100);"Proteobacteria"(100);Gammaproteobacteria(100);Acidithiobacillales(100);Acidithiobacillaceae(100);Acidithiobacillus(100); |
| 857 | 1 | 1 | 0 | 0 | Bacteria(100);"Fusobacteria"(100);"Fusobacteria"(100);"Fusobacteriales"(100);"Fusobacteriaceae"(100);Fusobacterium(100);                |
| 858 | 1 | 1 | 0 | 0 | Bacteria(100);unclassified(100);unclassified(100);unclassified(100);unclassified(100);unclassified(100);                                |
| 859 | 1 | 1 | 0 | 0 | Bacteria(100);"Bacteroidetes"(100);Flavobacteria(100);"Flavobacteriales"(100);Cryomorphaceae(100);Fluviicola(100);                      |
| 860 | 1 | 1 | 0 | 0 | Bacteria(100);unclassified(100);unclassified(100);unclassified(100);unclassified(100);unclassified(100);                                |
| 861 | 1 | 1 | 0 | 0 | Bacteria(100);"Proteobacteria"(100);Betaproteobacteria(100);Rhodocyclales(100);Rhodocyclaceae(100);unclassified(100);                   |
| 862 | 1 | 1 | 0 | 0 | Bacteria(100);"Actinobacteria"(100);Actinobacteria(100);Actinomycetales(100);unclassified(100);unclassified(100);                       |
| 863 | 1 | 1 | 0 | 0 | Bacteria(100);unclassified(100);unclassified(100);unclassified(100);unclassified(100);unclassified(100);                                |
| 864 | 2 | 2 | 0 | 0 | Bacteria(100);Firmicutes(100);Clostridia(100);Clostridiales(100);unclassified(100);unclassified(100);                                   |
| 865 | 1 | 1 | 0 | 0 | Bacteria(100);"Proteobacteria"(100);Gammaproteobacteria(100);"Enterobacteriales"(100);Enterobacteriaceae(100);unclassified(100);        |
| 866 | 1 | 1 | 0 | 0 | Bacteria(100);unclassified(100);unclassified(100);unclassified(100);unclassified(100);unclassified(100);                                |
| 867 | 1 | 1 | 0 | 0 | Bacteria(100);Firmicutes(100);Negativicutes(100);Selenomonadales(100);Veillonellaceae(100);Dialister(100);                              |
| 868 | 3 | 3 | 0 | 0 | Bacteria(100);"Proteobacteria"(100);Betaproteobacteria(100);Burkholderiales(100);unclassified(100);unclassified(100);                   |
| 869 | 1 | 1 | 0 | 0 | Bacteria(100);unclassified(100);unclassified(100);unclassified(100);unclassified(100);unclassified(100);                                |
| 870 | 1 | 1 | 0 | 0 | Bacteria(100);unclassified(100);unclassified(100);unclassified(100);unclassified(100);unclassified(100);                                |
| 871 | 1 | 1 | 0 | 0 | Bacteria(100);"Actinobacteria"(100);Actinobacteria(100);Actinomycetales(100);Micrococcaceae(100);Rothia(100);                           |

|     |   |   |   |   |                                                                                                                                                                                                                                        |
|-----|---|---|---|---|----------------------------------------------------------------------------------------------------------------------------------------------------------------------------------------------------------------------------------------|
| 872 | 1 | 1 | 0 | 0 | Bacteria(100);"Bacteroidetes"(100);"Bacteroidia"(100);"Bacteroidales"(100);"Prevotellaceae"(100);Prevotella(100);                                                                                                                      |
| 873 | 1 | 1 | 0 | 0 | Bacteria(100);"Actinobacteria"(100);Actinobacteria(100);Actinomycetales(100);Actinomycetaceae(100);Actinomyces(100);                                                                                                                   |
| 874 | 2 | 2 | 0 | 0 | Bacteria(100);"Actinobacteria"(100);Actinobacteria(100);Coriobacteriales(100);Coriobacteriaceae(100);Olsenella(100);                                                                                                                   |
| 875 | 1 | 1 | 0 | 0 | Bacteria(100);"Fusobacteria"(100);"Fusobacteria"(100);"Fusobacteriales"(100);"Fusobacteriaceae"(100);Cetobacterium(100);                                                                                                               |
| 876 | 1 | 1 | 0 | 0 | Bacteria(100);"Actinobacteria"(100);Actinobacteria(100);Actinomycetales(100);Actinomycetaceae(100);Actinomyces(100);                                                                                                                   |
| 877 | 1 | 1 | 0 | 0 | Bacteria(100);Firmicutes(100);Negativicutes(100);Selenomonadales(100);Veillonellaceae(100);unclassified(100);                                                                                                                          |
| 878 | 1 | 1 | 0 | 0 | Bacteria(100);unclassified(100);unclassified(100);unclassified(100);unclassified(100);unclassified(100);                                                                                                                               |
| 879 | 1 | 1 | 0 | 0 | Bacteria(100);"Actinobacteria"(100);Actinobacteria(100);Actinomycetales(100);unclassified(100);unclassified(100);                                                                                                                      |
| 880 | 1 | 1 | 0 | 0 | Bacteria(100);"Actinobacteria"(100);Actinobacteria(100);Actinomycetales(100);unclassified(100);unclassified(100);                                                                                                                      |
| 881 | 1 | 1 | 0 | 0 | Bacteria(100);unclassified(100);unclassified(100);unclassified(100);unclassified(100);unclassified(100);                                                                                                                               |
| 882 | 1 | 1 | 0 | 0 | Bacteria(100);"Actinobacteria"(100);Actinobacteria(100);Actinomycetales(100);Microbacteriaceae(100);unclassified(100);                                                                                                                 |
| 883 | 1 | 1 | 0 | 0 | Bacteria(100);Firmicutes(100);Clostridia(100);Clostridiales(100);Clostridiaceae_1(100);unclassified(100);                                                                                                                              |
| 884 | 1 | 1 | 0 | 0 | Bacteria(100);unclassified(100);unclassified(100);unclassified(100);unclassified(100);unclassified(100);                                                                                                                               |
| 885 | 1 | 1 | 0 | 0 | Bacteria(100);unclassified(100);unclassified(100);unclassified(100);unclassified(100);unclassified(100);                                                                                                                               |
| 886 | 1 | 1 | 0 | 0 | Bacteria(100);unclassified(100);unclassified(100);unclassified(100);unclassified(100);unclassified(100);                                                                                                                               |
| 887 | 1 | 1 | 0 | 0 | Bacteria(100);unclassified(100);unclassified(100);unclassified(100);unclassified(100);unclassified(100);<br>Bacteria(100);OD1(100);OD1_class_incertae_sedis(100);OD1_order_incertae_sedis(100);OD1_family_incertae_sedis(100);OD1_genu |
| 888 | 1 | 1 | 0 | 0 | s_incertae_sedis(100);                                                                                                                                                                                                                 |
| 889 | 1 | 1 | 0 | 0 | Bacteria(100);Firmicutes(100);Bacilli(100);Lactobacillales(100);unclassified(100);unclassified(100);                                                                                                                                   |
| 890 | 1 | 1 | 0 | 0 | Bacteria(100);Firmicutes(100);Clostridia(100);Clostridiales(100);Lachnospiraceae(100);Clostridium_XIVb(100);                                                                                                                           |
| 891 | 1 | 1 | 0 | 0 | Bacteria(100);"Actinobacteria"(100);Actinobacteria(100);Actinomycetales(100);Propionibacteriaceae(100);Friedmanniella(100);                                                                                                            |
| 892 | 1 | 1 | 0 | 0 | Bacteria(100);unclassified(100);unclassified(100);unclassified(100);unclassified(100);unclassified(100);                                                                                                                               |
| 893 | 1 | 1 | 0 | 0 | Bacteria(100);"Fusobacteria"(100);"Fusobacteria"(100);"Fusobacteriales"(100);"Fusobacteriaceae"(100);Cetobacterium(100);                                                                                                               |
| 894 | 1 | 1 | 0 | 0 | Bacteria(100);"Proteobacteria"(100);unclassified(100);unclassified(100);unclassified(100);unclassified(100);                                                                                                                           |
| 895 | 1 | 1 | 0 | 0 | Bacteria(100);Firmicutes(100);Clostridia(100);Clostridiales(100);Clostridiaceae_1(100);unclassified(100);                                                                                                                              |
| 896 | 1 | 1 | 0 | 0 | Bacteria(100);unclassified(100);unclassified(100);unclassified(100);unclassified(100);unclassified(100);                                                                                                                               |
| 897 | 1 | 1 | 0 | 0 | Bacteria(100);"Proteobacteria"(100);Gammaproteobacteria(100);unclassified(100);unclassified(100);unclassified(100);                                                                                                                    |
| 898 | 1 | 1 | 0 | 0 | Bacteria(100);Firmicutes(100);Bacilli(100);Lactobacillales(100);Streptococcaceae(100);Streptococcus(100);                                                                                                                              |
| 899 | 1 | 1 | 0 | 0 | Bacteria(100);"Actinobacteria"(100);Actinobacteria(100);Actinomycetales(100);Actinomycetaceae(100);unclassified(100);                                                                                                                  |
| 900 | 1 | 1 | 0 | 0 | Bacteria(100);"Proteobacteria"(100);Deltaproteobacteria(100);Myxococcales(100);unclassified(100);unclassified(100);                                                                                                                    |

|     |   |   |   |   |                                                                                                                                                                                                                                                  |
|-----|---|---|---|---|--------------------------------------------------------------------------------------------------------------------------------------------------------------------------------------------------------------------------------------------------|
| 901 | 1 | 1 | 0 | 0 | Bacteria(100);unclassified(100);unclassified(100);unclassified(100);unclassified(100);unclassified(100);                                                                                                                                         |
| 902 | 1 | 1 | 0 | 0 | Bacteria(100);"Proteobacteria"(100);Gammaproteobacteria(100);Pasteurellales(100);Pasteurellaceae(100);unclassified(100);                                                                                                                         |
| 903 | 1 | 1 | 0 | 0 | Bacteria(100);unclassified(100);unclassified(100);unclassified(100);unclassified(100);unclassified(100);                                                                                                                                         |
| 904 | 1 | 1 | 0 | 0 | Bacteria(100);"Actinobacteria"(100);Actinobacteria(100);Actinomycetales(100);unclassified(100);unclassified(100);                                                                                                                                |
| 905 | 1 | 1 | 0 | 0 | Bacteria(100);"Actinobacteria"(100);Actinobacteria(100);Actinomycetales(100);Nocardioideaceae(100);Nocardioideae(100);                                                                                                                           |
| 906 | 1 | 1 | 0 | 0 | Bacteria(100);unclassified(100);unclassified(100);unclassified(100);unclassified(100);unclassified(100);                                                                                                                                         |
| 907 | 1 | 1 | 0 | 0 | Bacteria(100);unclassified(100);unclassified(100);unclassified(100);unclassified(100);unclassified(100);                                                                                                                                         |
| 908 | 4 | 4 | 0 | 0 | Bacteria(100);"Proteobacteria"(100);Alphaproteobacteria(100);Rhizobiales(100);Rhizobiaceae(100);Rhizobium(100);                                                                                                                                  |
| 909 | 1 | 1 | 0 | 0 | Bacteria(100);Firmicutes(100);Clostridia(100);Clostridiales(100);Lachnospiraceae(100);unclassified(100);                                                                                                                                         |
| 910 | 1 | 1 | 0 | 0 | Bacteria(100);"Actinobacteria"(100);Actinobacteria(100);Actinomycetales(100);Propionibacteriaceae(100);Propionibacterium(100);                                                                                                                   |
| 911 | 1 | 1 | 0 | 0 | Bacteria(100);Firmicutes(100);Bacilli(100);Lactobacillales(100);Streptococcaceae(100);Streptococcus(100);                                                                                                                                        |
| 912 | 1 | 1 | 0 | 0 | Bacteria(100);Firmicutes(100);Bacilli(100);Bacillales(100);Staphylococcaceae(100);Staphylococcus(100);                                                                                                                                           |
| 913 | 1 | 1 | 0 | 0 | Bacteria(100);"Proteobacteria"(100);Gammaproteobacteria(100);unclassified(100);unclassified(100);unclassified(100);<br>Bacteria(100);"Proteobacteria"(100);Gammaproteobacteria(100);Pseudomonadales(100);Pseudomonadaceae(100);unclassified(100) |
| 914 | 1 | 1 | 0 | 0 | ;                                                                                                                                                                                                                                                |
| 915 | 1 | 1 | 0 | 0 | Bacteria(100);"Fusobacteria"(100);"Fusobacteria"(100);"Fusobacteriales"(100);"Fusobacteriaceae"(100);Fusobacterium(100);                                                                                                                         |
| 916 | 1 | 1 | 0 | 0 | Bacteria(100);Firmicutes(100);Bacilli(100);Lactobacillales(100);unclassified(100);unclassified(100);                                                                                                                                             |
| 917 | 1 | 1 | 0 | 0 | Bacteria(100);unclassified(100);unclassified(100);unclassified(100);unclassified(100);unclassified(100);                                                                                                                                         |
| 918 | 1 | 1 | 0 | 0 | Bacteria(100);Firmicutes(100);Bacilli(100);Lactobacillales(100);Aerococcaceae(100);Dolosicoccus(100);                                                                                                                                            |
| 919 | 1 | 1 | 0 | 0 | Bacteria(100);"Proteobacteria"(100);Betaproteobacteria(100);Neisseriales(100);Neisseriaceae(100);unclassified(100);<br>Bacteria(100);TM7(100);TM7_class_incertae_sedis(100);TM7_order_incertae_sedis(100);TM7_family_incertae_sedis(100);TM7_gen |
| 920 | 1 | 1 | 0 | 0 | us_incertae_sedis(100);                                                                                                                                                                                                                          |
| 921 | 1 | 1 | 0 | 0 | Bacteria(100);Firmicutes(100);Bacilli(100);Lactobacillales(100);Streptococcaceae(100);Streptococcus(100);                                                                                                                                        |
| 922 | 1 | 1 | 0 | 0 | Bacteria(100);"Proteobacteria"(100);Betaproteobacteria(100);Neisseriales(100);Neisseriaceae(100);unclassified(100);                                                                                                                              |
| 923 | 1 | 1 | 0 | 0 | Bacteria(100);"Proteobacteria"(100);Alphaproteobacteria(100);Rhodospirillales(100);Acetobacteraceae(100);unclassified(100);                                                                                                                      |
| 924 | 1 | 1 | 0 | 0 | Bacteria(100);"Proteobacteria"(100);Betaproteobacteria(100);Burkholderiales(100);unclassified(100);unclassified(100);                                                                                                                            |
| 925 | 1 | 1 | 0 | 0 | Bacteria(100);"Proteobacteria"(100);Gammaproteobacteria(100);Xanthomonadales(100);Xanthomonadaceae(100);unclassified(100);                                                                                                                       |
| 926 | 1 | 1 | 0 | 0 | Bacteria(100);unclassified(100);unclassified(100);unclassified(100);unclassified(100);unclassified(100);                                                                                                                                         |
| 927 | 1 | 1 | 0 | 0 | Bacteria(100);unclassified(100);unclassified(100);unclassified(100);unclassified(100);unclassified(100);                                                                                                                                         |
| 928 | 1 | 1 | 0 | 0 | Bacteria(100);Firmicutes(100);Bacilli(100);Lactobacillales(100);unclassified(100);unclassified(100);                                                                                                                                             |
| 929 | 1 | 1 | 0 | 0 | Bacteria(100);"Actinobacteria"(100);Actinobacteria(100);Actinomycetales(100);unclassified(100);unclassified(100);                                                                                                                                |

|     |   |   |   |   |                                                                                                                                  |
|-----|---|---|---|---|----------------------------------------------------------------------------------------------------------------------------------|
| 930 | 1 | 1 | 0 | 0 | Bacteria(100);"Proteobacteria"(100);Gammaproteobacteria(100);Pseudomonadales(100);Pseudomonadaceae(100);unclassified(100);       |
| 931 | 1 | 1 | 0 | 0 | Bacteria(100);"Proteobacteria"(100);Gammaproteobacteria(100);"Enterobacteriales"(100);Enterobacteriaceae(100);unclassified(100); |
| 932 | 1 | 1 | 0 | 0 | Bacteria(100);"Proteobacteria"(100);Alphaproteobacteria(100);Sphingomonadales(100);unclassified(100);unclassified(100);          |
| 933 | 1 | 1 | 0 | 0 | Bacteria(100);unclassified(100);unclassified(100);unclassified(100);unclassified(100);unclassified(100);                         |
| 934 | 1 | 1 | 0 | 0 | Bacteria(100);"Fusobacteria"(100);"Fusobacteria"(100);"Fusobacteriales"(100);"Fusobacteriaceae"(100);unclassified(100);          |
| 935 | 1 | 1 | 0 | 0 | Bacteria(100);Firmicutes(100);Bacilli(100);Lactobacillales(100);unclassified(100);unclassified(100);                             |
| 936 | 1 | 1 | 0 | 0 | Bacteria(100);unclassified(100);unclassified(100);unclassified(100);unclassified(100);unclassified(100);                         |
| 937 | 1 | 1 | 0 | 0 | Bacteria(100);unclassified(100);unclassified(100);unclassified(100);unclassified(100);unclassified(100);                         |
| 938 | 1 | 1 | 0 | 0 | Bacteria(100);unclassified(100);unclassified(100);unclassified(100);unclassified(100);unclassified(100);                         |
| 939 | 1 | 1 | 0 | 0 | Bacteria(100);unclassified(100);unclassified(100);unclassified(100);unclassified(100);unclassified(100);                         |
| 940 | 1 | 1 | 0 | 0 | Bacteria(100);"Actinobacteria"(100);Actinobacteria(100);Actinomycetales(100);Actinomycetaceae(100);Actinomyces(100);             |
| 941 | 1 | 1 | 0 | 0 | Bacteria(100);unclassified(100);unclassified(100);unclassified(100);unclassified(100);unclassified(100);                         |
| 942 | 1 | 1 | 0 | 0 | Bacteria(100);unclassified(100);unclassified(100);unclassified(100);unclassified(100);unclassified(100);                         |
| 943 | 1 | 1 | 0 | 0 | Bacteria(100);Firmicutes(100);Bacilli(100);Lactobacillales(100);Streptococcaceae(100);Streptococcus(100);                        |
| 944 | 1 | 1 | 0 | 0 | Bacteria(100);"Proteobacteria"(100);Alphaproteobacteria(100);unclassified(100);unclassified(100);unclassified(100);              |
| 945 | 1 | 1 | 0 | 0 | Bacteria(100);"Actinobacteria"(100);Actinobacteria(100);Actinomycetales(100);unclassified(100);unclassified(100);                |
| 946 | 2 | 2 | 0 | 0 | Bacteria(100);"Fusobacteria"(100);"Fusobacteria"(100);"Fusobacteriales"(100);"Leptotrichiaceae"(100);unclassified(100);          |
| 947 | 1 | 1 | 0 | 0 | Bacteria(100);Firmicutes(100);Negativicutes(100);Selenomonadales(100);Veillonellaceae(100);Megamonas(100);                       |
| 948 | 1 | 1 | 0 | 0 | Bacteria(100);"Proteobacteria"(100);Alphaproteobacteria(100);Rhodobacterales(100);Rhodobacteraceae(100);unclassified(100);       |
| 949 | 2 | 2 | 0 | 0 | Bacteria(100);"Actinobacteria"(100);Actinobacteria(100);Actinomycetales(100);Actinomycetaceae(100);Actinomyces(100);             |
| 950 | 2 | 2 | 0 | 0 | Bacteria(100);Firmicutes(100);Bacilli(100);Lactobacillales(100);unclassified(100);unclassified(100);                             |
| 951 | 1 | 1 | 0 | 0 | Bacteria(100);"Actinobacteria"(100);Actinobacteria(100);Actinomycetales(100);Micrococcaceae(100);Rothia(100);                    |
| 952 | 1 | 1 | 0 | 0 | Bacteria(100);Firmicutes(100);Bacilli(100);Lactobacillales(100);unclassified(100);unclassified(100);                             |
| 953 | 1 | 1 | 0 | 0 | Bacteria(100);unclassified(100);unclassified(100);unclassified(100);unclassified(100);unclassified(100);                         |
| 954 | 2 | 2 | 0 | 0 | Bacteria(100);Firmicutes(100);Negativicutes(100);Selenomonadales(100);Veillonellaceae(100);unclassified(100);                    |
| 955 | 1 | 1 | 0 | 0 | Bacteria(100);unclassified(100);unclassified(100);unclassified(100);unclassified(100);unclassified(100);                         |
| 956 | 1 | 1 | 0 | 0 | Bacteria(100);"Proteobacteria"(100);Betaproteobacteria(100);Neisseriales(100);Neisseriaceae(100);unclassified(100);              |
| 957 | 1 | 1 | 0 | 0 | Bacteria(100);"Fusobacteria"(100);"Fusobacteria"(100);"Fusobacteriales"(100);"Fusobacteriaceae"(100);Fusobacterium(100);         |

|     |   |   |   |                                                                                                                                                                                                                                                 |
|-----|---|---|---|-------------------------------------------------------------------------------------------------------------------------------------------------------------------------------------------------------------------------------------------------|
|     |   |   |   | Bacteria(100);"Proteobacteria"(100);Gammaproteobacteria(100);Pseudomonadales(100);Pseudomonadaceae(100);unclassified(100)                                                                                                                       |
| 958 | 1 | 1 | 0 | 0;                                                                                                                                                                                                                                              |
| 959 | 1 | 1 | 0 | 0 Bacteria(100);Firmicutes(100);Clostridia(100);Clostridiales(100);Clostridiaceae_1(100);unclassified(100);                                                                                                                                     |
| 960 | 1 | 1 | 0 | 0 Bacteria(100);Firmicutes(100);Clostridia(100);Clostridiales(100);Clostridiaceae_1(100);unclassified(100);                                                                                                                                     |
| 961 | 1 | 1 | 0 | 0 Bacteria(100);"Proteobacteria"(100);Alphaproteobacteria(100);Caulobacterales(100);Caulobacteraceae(100);Brevundimonas(100);                                                                                                                   |
| 962 | 1 | 1 | 0 | 0 Bacteria(100);"Proteobacteria"(100);Gammaproteobacteria(100);Pasteurellales(100);Pasteurellaceae(100);unclassified(100);                                                                                                                      |
| 963 | 1 | 1 | 0 | 0 Bacteria(100);"Proteobacteria"(100);Betaproteobacteria(100);Neisseriales(100);Neisseriaceae(100);Neisseria(100);                                                                                                                              |
| 964 | 1 | 1 | 0 | 0 Bacteria(100);"Fusobacteria"(100);"Fusobacteria"(100);"Fusobacteriales"(100);"Fusobacteriaceae"(100);unclassified(100);                                                                                                                       |
| 965 | 1 | 1 | 0 | 0 Bacteria(100);unclassified(100);unclassified(100);unclassified(100);unclassified(100);unclassified(100);                                                                                                                                      |
| 966 | 1 | 1 | 0 | 0 Bacteria(100);"Proteobacteria"(100);Betaproteobacteria(100);Neisseriales(100);Neisseriaceae(100);unclassified(100);                                                                                                                           |
| 967 | 1 | 1 | 0 | 0 Bacteria(100);unclassified(100);unclassified(100);unclassified(100);unclassified(100);unclassified(100);                                                                                                                                      |
| 968 | 1 | 1 | 0 | 0 Bacteria(100);"Proteobacteria"(100);Alphaproteobacteria(100);Rhodobacterales(100);Rhodobacteraceae(100);unclassified(100);                                                                                                                    |
| 969 | 1 | 1 | 0 | 0 Bacteria(100);Firmicutes(100);Bacilli(100);Lactobacillales(100);unclassified(100);unclassified(100);                                                                                                                                          |
| 970 | 1 | 1 | 0 | 0 Bacteria(100);unclassified(100);unclassified(100);unclassified(100);unclassified(100);unclassified(100);                                                                                                                                      |
| 971 | 2 | 2 | 0 | 0 Bacteria(100);"Proteobacteria"(100);Alphaproteobacteria(100);Rhodospirillales(100);Acetobacteraceae(100);Roseomonas(100);                                                                                                                     |
| 972 | 2 | 2 | 0 | 0 Bacteria(100);unclassified(100);unclassified(100);unclassified(100);unclassified(100);unclassified(100);                                                                                                                                      |
| 973 | 1 | 1 | 0 | 0 Bacteria(100);"Actinobacteria"(100);Actinobacteria(100);Actinomycetales(100);Micrococcaceae(100);Rothia(100);<br>Bacteria(100);"Proteobacteria"(100);Epsilonproteobacteria(100);Campylobacterales(100);Campylobacteraceae(100);Campylobacter( |
| 974 | 1 | 1 | 0 | 0 100);                                                                                                                                                                                                                                         |
| 975 | 1 | 1 | 0 | 0 Bacteria(100);"Proteobacteria"(100);Alphaproteobacteria(100);Rhizobiales(100);Bradyrhizobiaceae(100);unclassified(100);                                                                                                                       |
| 976 | 2 | 2 | 0 | 0 Bacteria(100);unclassified(100);unclassified(100);unclassified(100);unclassified(100);unclassified(100);                                                                                                                                      |
| 977 | 2 | 2 | 0 | 0 Bacteria(100);Firmicutes(100);Clostridia(100);Clostridiales(100);Lachnospiraceae(100);Lachnospiracea_incertae_sedis(100);                                                                                                                     |
| 978 | 2 | 2 | 0 | 0 Bacteria(100);Firmicutes(100);Bacilli(100);Lactobacillales(100);Aerococcaceae(100);unclassified(100);                                                                                                                                         |
| 979 | 1 | 1 | 0 | 0 Bacteria(100);Firmicutes(100);Bacilli(100);unclassified(100);unclassified(100);unclassified(100);                                                                                                                                             |
| 980 | 1 | 1 | 0 | 0 Bacteria(100);unclassified(100);unclassified(100);unclassified(100);unclassified(100);unclassified(100);                                                                                                                                      |
| 981 | 1 | 1 | 0 | 0 Bacteria(100);"Proteobacteria"(100);Betaproteobacteria(100);Neisseriales(100);Neisseriaceae(100);unclassified(100);                                                                                                                           |
| 982 | 1 | 1 | 0 | 0 Bacteria(100);Firmicutes(100);Bacilli(100);Lactobacillales(100);Streptococcaceae(100);Streptococcus(100);                                                                                                                                     |
| 983 | 1 | 1 | 0 | 0 Bacteria(100);Firmicutes(100);Bacilli(100);Lactobacillales(100);unclassified(100);unclassified(100);                                                                                                                                          |
| 984 | 1 | 1 | 0 | 0 Bacteria(100);"Actinobacteria"(100);Actinobacteria(100);Acidimicrobiales(100);unclassified(100);unclassified(100);                                                                                                                            |
| 985 | 1 | 1 | 0 | 0 Bacteria(100);"Actinobacteria"(100);Actinobacteria(100);Actinomycetales(100);Corynebacteriaceae(100);Corynebacterium(100);                                                                                                                    |

|     |   |   |   |   |                                                                                                                                                                                                                                                     |
|-----|---|---|---|---|-----------------------------------------------------------------------------------------------------------------------------------------------------------------------------------------------------------------------------------------------------|
| 986 | 1 | 1 | 0 | 0 | Bacteria(100);"Proteobacteria"(100);Alphaproteobacteria(100);unclassified(100);unclassified(100);unclassified(100);                                                                                                                                 |
| 987 | 1 | 1 | 0 | 0 | Bacteria(100);unclassified(100);unclassified(100);unclassified(100);unclassified(100);unclassified(100);                                                                                                                                            |
| 988 | 1 | 1 | 0 | 0 | Bacteria(100);Firmicutes(100);Clostridia(100);Clostridiales(100);Lachnospiraceae(100);Syntrophococcus(100);                                                                                                                                         |
| 989 | 1 | 1 | 0 | 0 | Bacteria(100);unclassified(100);unclassified(100);unclassified(100);unclassified(100);unclassified(100);                                                                                                                                            |
| 990 | 1 | 1 | 0 | 0 | Bacteria(100);unclassified(100);unclassified(100);unclassified(100);unclassified(100);unclassified(100);                                                                                                                                            |
| 991 | 1 | 1 | 0 | 0 | Bacteria(100);"Actinobacteria"(100);Actinobacteria(100);Actinomycetales(100);unclassified(100);unclassified(100);                                                                                                                                   |
| 992 | 1 | 1 | 0 | 0 | Bacteria(100);unclassified(100);unclassified(100);unclassified(100);unclassified(100);unclassified(100);                                                                                                                                            |
| 993 | 1 | 1 | 0 | 0 | Bacteria(100);"Proteobacteria"(100);Gammaproteobacteria(100);Pseudomonadales(100);Moraxellaceae(100);Acinetobacter(100);<br>Bacteria(100);"Proteobacteria"(100);Gammaproteobacteria(100);Gammaproteobacteria_order_incertae_sedis(100);Gammaproteob |
| 994 | 1 | 1 | 0 | 0 | acteria_family_incertae_sedis(100);unclassified(100);                                                                                                                                                                                               |
| 995 | 1 | 1 | 0 | 0 | Bacteria(100);"Proteobacteria"(100);Alphaproteobacteria(100);Rhizobiales(100);unclassified(100);unclassified(100);                                                                                                                                  |
| 996 | 1 | 1 | 0 | 0 | Bacteria(100);"Deinococcus-Thermus"(100);Deinococci(100);Deinococcales(100);Deinococcaceae(100);Deinococcus(100);                                                                                                                                   |
| 997 | 1 | 1 | 0 | 0 | Bacteria(100);"Proteobacteria"(100);Gammaproteobacteria(100);Pasteurellales(100);Pasteurellaceae(100);unclassified(100);                                                                                                                            |
| 998 | 1 | 0 | 1 | 0 | Bacteria(100);"Actinobacteria"(100);Actinobacteria(100);Actinomycetales(100);Micrococcaceae(100);Rothia(100);                                                                                                                                       |
| 999 | 1 | 1 | 0 | 0 | Bacteria(100);unclassified(100);unclassified(100);unclassified(100);unclassified(100);unclassified(100);                                                                                                                                            |
| ### | 1 | 1 | 0 | 0 | Bacteria(100);"Bacteroidetes"(100);"Bacteroidia"(100);"Bacteroidales"(100);"Porphyromonadaceae"(100);unclassified(100);                                                                                                                             |
| ### | 1 | 1 | 0 | 0 | Bacteria(100);"Actinobacteria"(100);Actinobacteria(100);unclassified(100);unclassified(100);unclassified(100);                                                                                                                                      |
| ### | 1 | 1 | 0 | 0 | Bacteria(100);"Proteobacteria"(100);Alphaproteobacteria(100);unclassified(100);unclassified(100);unclassified(100);                                                                                                                                 |
| ### | 2 | 2 | 0 | 0 | Bacteria(100);unclassified(100);unclassified(100);unclassified(100);unclassified(100);unclassified(100);                                                                                                                                            |
| ### | 2 | 2 | 0 | 0 | Bacteria(100);Firmicutes(100);Clostridia(100);Clostridiales(100);unclassified(100);unclassified(100);                                                                                                                                               |
| ### | 1 | 1 | 0 | 0 | Bacteria(100);"Actinobacteria"(100);Actinobacteria(100);Actinomycetales(100);unclassified(100);unclassified(100);                                                                                                                                   |
| ### | 1 | 1 | 0 | 0 | Bacteria(100);"Proteobacteria"(100);Deltaproteobacteria(100);Desulfovibrionales(100);Desulfovibrionaceae(100);Desulfovibrio(100);                                                                                                                   |
| ### | 1 | 1 | 0 | 0 | Bacteria(100);unclassified(100);unclassified(100);unclassified(100);unclassified(100);unclassified(100);                                                                                                                                            |
| ### | 1 | 1 | 0 | 0 | Bacteria(100);Firmicutes(100);Clostridia(100);Clostridiales(100);Peptostreptococcaceae(100);Clostridium_XI(100);<br>Bacteria(100);"Proteobacteria"(100);Gammaproteobacteria(100);Gammaproteobacteria_order_incertae_sedis(100);Gammaproteob         |
| ### | 1 | 1 | 0 | 0 | acteria_family_incertae_sedis(100);unclassified(100);                                                                                                                                                                                               |
| ### | 3 | 3 | 0 | 0 | Bacteria(100);unclassified(100);unclassified(100);unclassified(100);unclassified(100);unclassified(100);                                                                                                                                            |
| ### | 1 | 1 | 0 | 0 | Bacteria(100);"Proteobacteria"(100);Gammaproteobacteria(100);unclassified(100);unclassified(100);unclassified(100);                                                                                                                                 |
| ### | 1 | 1 | 0 | 0 | Bacteria(100);Firmicutes(100);Clostridia(100);Clostridiales(100);Clostridiales_Incertae_Sedis_XI(100);Peptoniphilus(100);                                                                                                                           |
| ### | 1 | 1 | 0 | 0 | Bacteria(100);Firmicutes(100);Bacilli(100);Lactobacillales(100);Streptococcaceae(100);Streptococcus(100);                                                                                                                                           |
| ### | 1 | 1 | 0 | 0 | Bacteria(100);Firmicutes(100);Erysipelotrichia(100);Erysipelotrichales(100);Erysipelotrichaceae(100);Bulleidia(100);                                                                                                                                |



|     |   |   |   |   |                                                                                                                                                                                                                                                   |
|-----|---|---|---|---|---------------------------------------------------------------------------------------------------------------------------------------------------------------------------------------------------------------------------------------------------|
| ### | 1 | 1 | 0 | 0 | Bacteria(100);"Proteobacteria"(100);Gammaproteobacteria(100);Legionellales(100);Legionellaceae(100);Legionella(100);<br>Bacteria(100);"Proteobacteria"(100);Gammaproteobacteria(100);Pseudomonadales(100);Pseudomonadaceae(100);unclassified(100) |
| ### | 1 | 1 | 0 | 0 | ;                                                                                                                                                                                                                                                 |
| ### | 1 | 1 | 0 | 0 | Bacteria(100);"Actinobacteria"(100);Actinobacteria(100);Bifidobacteriales(100);Bifidobacteriaceae(100);Gardnerella(100);                                                                                                                          |
| ### | 1 | 1 | 0 | 0 | Bacteria(100);Firmicutes(100);Bacilli(100);Lactobacillales(100);Streptococcaceae(100);Streptococcus(100);                                                                                                                                         |
| ### | 1 | 1 | 0 | 0 | Bacteria(100);"Bacteroidetes"(100);"Sphingobacteria"(100);"Sphingobacteriales"(100);Chitinophagaceae(100);unclassified(100);                                                                                                                      |
| ### | 1 | 1 | 0 | 0 | Bacteria(100);unclassified(100);unclassified(100);unclassified(100);unclassified(100);unclassified(100);                                                                                                                                          |
| ### | 1 | 1 | 0 | 0 | Bacteria(100);"Actinobacteria"(100);Actinobacteria(100);Rubrobacterales(100);Rubrobacteraceae(100);Rubrobacter(100);                                                                                                                              |
| ### | 1 | 1 | 0 | 0 | Bacteria(100);"Proteobacteria"(100);Alphaproteobacteria(100);Sphingomonadales(100);Sphingomonadaceae(100);unclassified(100);                                                                                                                      |
| ### | 1 | 1 | 0 | 0 | Bacteria(100);unclassified(100);unclassified(100);unclassified(100);unclassified(100);unclassified(100);                                                                                                                                          |
| ### | 1 | 1 | 0 | 0 | Bacteria(100);"Proteobacteria"(100);Betaproteobacteria(100);Neisseriales(100);Neisseriaceae(100);unclassified(100);                                                                                                                               |
| ### | 2 | 2 | 0 | 0 | Bacteria(100);"Proteobacteria"(100);Betaproteobacteria(100);Rhodocyclales(100);Rhodocyclaceae(100);Zoogloea(100);                                                                                                                                 |
| ### | 1 | 1 | 0 | 0 | Bacteria(100);"Proteobacteria"(100);Epsilonproteobacteria(100);Campylobacterales(100);Helicobacteraceae(100);unclassified(100);                                                                                                                   |
| ### | 1 | 1 | 0 | 0 | Bacteria(100);"Proteobacteria"(100);Alphaproteobacteria(100);Sphingomonadales(100);Sphingomonadaceae(100);unclassified(100);                                                                                                                      |
| ### | 1 | 1 | 0 | 0 | Bacteria(100);unclassified(100);unclassified(100);unclassified(100);unclassified(100);unclassified(100);                                                                                                                                          |
| ### | 2 | 2 | 0 | 0 | Bacteria(100);Firmicutes(100);Bacilli(100);Lactobacillales(100);Streptococcaceae(100);Streptococcus(100);                                                                                                                                         |
| ### | 3 | 3 | 0 | 0 | Bacteria(100);Firmicutes(100);Clostridia(100);Clostridiales(100);unclassified(100);unclassified(100);<br>Bacteria(100);"Proteobacteria"(100);Gammaproteobacteria(100);"Enterobacteriales"(100);Enterobacteriaceae(100);Escherichia_Shig           |
| ### | 2 | 2 | 0 | 0 | ella(100);                                                                                                                                                                                                                                        |
| ### | 1 | 1 | 0 | 0 | Bacteria(100);"Proteobacteria"(100);Betaproteobacteria(100);Neisseriales(100);Neisseriaceae(100);unclassified(100);                                                                                                                               |
| ### | 2 | 2 | 0 | 0 | Bacteria(100);"Bacteroidetes"(100);"Bacteroidia"(100);"Bacteroidales"(100);"Prevotellaceae"(100);Prevotella(100);                                                                                                                                 |
| ### | 1 | 1 | 0 | 0 | Bacteria(100);"Proteobacteria"(100);Alphaproteobacteria(100);Rhodospirillales(100);Acetobacteraceae(100);Rhodovarius(100);                                                                                                                        |
| ### | 1 | 1 | 0 | 0 | Bacteria(100);"Proteobacteria"(100);Betaproteobacteria(100);Neisseriales(100);Neisseriaceae(100);unclassified(100);                                                                                                                               |
| ### | 1 | 1 | 0 | 0 | Bacteria(100);"Fusobacteria"(100);"Fusobacteria"(100);"Fusobacteriales"(100);"Fusobacteriaceae"(100);Fusobacterium(100);                                                                                                                          |
| ### | 1 | 1 | 0 | 0 | Bacteria(100);Firmicutes(100);Bacilli(100);unclassified(100);unclassified(100);unclassified(100);                                                                                                                                                 |
| ### | 2 | 2 | 0 | 0 | Bacteria(100);"Bacteroidetes"(100);Flavobacteria(100);"Flavobacteriales"(100);Flavobacteriaceae(100);Chryseobacterium(100);                                                                                                                       |
| ### | 1 | 1 | 0 | 0 | Bacteria(100);"Proteobacteria"(100);Gammaproteobacteria(100);Pseudomonadales(100);Moraxellaceae(100);Moraxella(100);                                                                                                                              |
| ### | 1 | 1 | 0 | 0 | Bacteria(100);unclassified(100);unclassified(100);unclassified(100);unclassified(100);unclassified(100);                                                                                                                                          |

|     |   |   |   |   |                                                                                                                                 |
|-----|---|---|---|---|---------------------------------------------------------------------------------------------------------------------------------|
| ### | 1 | 1 | 0 | 0 | Bacteria(100);unclassified(100);unclassified(100);unclassified(100);unclassified(100);unclassified(100);                        |
| ### | 1 | 1 | 0 | 0 | Bacteria(100);"Proteobacteria"(100);Deltaproteobacteria(100);Bdellovibrionales(100);Bacteriovoracaceae(100);Peredibacter(100);  |
| ### | 1 | 1 | 0 | 0 | Bacteria(100);Firmicutes(100);Clostridia(100);Clostridiales(100);unclassified(100);unclassified(100);                           |
| ### | 1 | 1 | 0 | 0 | Bacteria(100);"Proteobacteria"(100);Alphaproteobacteria(100);unclassified(100);unclassified(100);unclassified(100);             |
| ### | 1 | 1 | 0 | 0 | Bacteria(100);Firmicutes(100);Clostridia(100);Clostridiales(100);Peptostreptococcaceae(100);unclassified(100);                  |
| ### | 1 | 1 | 0 | 0 | Bacteria(100);unclassified(100);unclassified(100);unclassified(100);unclassified(100);unclassified(100);                        |
| ### | 2 | 2 | 0 | 0 | Bacteria(100);"Proteobacteria"(100);Alphaproteobacteria(100);Rhodospirillales(100);Acetobacteraceae(100);unclassified(100);     |
| ### | 1 | 1 | 0 | 0 | Bacteria(100);"Proteobacteria"(100);Alphaproteobacteria(100);Rhizobiales(100);unclassified(100);unclassified(100);              |
| ### | 1 | 1 | 0 | 0 | Bacteria(100);Firmicutes(100);Clostridia(100);Clostridiales(100);unclassified(100);unclassified(100);                           |
| ### | 1 | 1 | 0 | 0 | Bacteria(100);"Bacteroidetes"(100);Flavobacteria(100);"Flavobacteriales"(100);Flavobacteriaceae(100);Flavobacterium(100);       |
| ### | 1 | 1 | 0 | 0 | Bacteria(100);Firmicutes(100);Bacilli(100);Lactobacillales(100);Streptococcaceae(100);Streptococcus(100);                       |
| ### | 1 | 1 | 0 | 0 | Bacteria(100);Firmicutes(100);unclassified(100);unclassified(100);unclassified(100);unclassified(100);                          |
| ### | 1 | 1 | 0 | 0 | Bacteria(100);"Bacteroidetes"(100);"Bacteroidia"(100);"Bacteroidales"(100);"Rikenellaceae"(100);Alistipes(100);                 |
| ### | 1 | 1 | 0 | 0 | Bacteria(100);unclassified(100);unclassified(100);unclassified(100);unclassified(100);unclassified(100);                        |
| ### | 1 | 1 | 0 | 0 | Bacteria(100);"Proteobacteria"(100);Gammaproteobacteria(100);Pasteurellales(100);Pasteurellaceae(100);unclassified(100);        |
| ### | 1 | 1 | 0 | 0 | Bacteria(100);"Proteobacteria"(100);Gammaproteobacteria(100);unclassified(100);unclassified(100);unclassified(100);             |
| ### | 1 | 1 | 0 | 0 | Bacteria(100);"Proteobacteria"(100);Alphaproteobacteria(100);Rhizobiales(100);unclassified(100);unclassified(100);              |
| ### | 2 | 2 | 0 | 0 | Bacteria(100);Firmicutes(100);Bacilli(100);Bacillales(100);Paenibacillaceae_1(100);Paenibacillus(100);                          |
| ### | 1 | 1 | 0 | 0 | Bacteria(100);Firmicutes(100);unclassified(100);unclassified(100);unclassified(100);unclassified(100);                          |
| ### | 1 | 1 | 0 | 0 | Bacteria(100);"Bacteroidetes"(100);unclassified(100);unclassified(100);unclassified(100);unclassified(100);                     |
| ### | 1 | 1 | 0 | 0 | Bacteria(100);"Proteobacteria"(100);Epsilonproteobacteria(100);Campylobacterales(100);Campylobacteraceae(100);Campylobacter(    |
| ### | 1 | 1 | 0 | 0 | 100);                                                                                                                           |
| ### | 1 | 1 | 0 | 0 | Bacteria(100);"Proteobacteria"(100);Alphaproteobacteria(100);unclassified(100);unclassified(100);unclassified(100);             |
| ### | 1 | 1 | 0 | 0 | Bacteria(100);unclassified(100);unclassified(100);unclassified(100);unclassified(100);unclassified(100);                        |
| ### | 2 | 2 | 0 | 0 | Bacteria(100);"Bacteroidetes"(100);"Bacteroidia"(100);"Bacteroidales"(100);"Prevotellaceae"(100);Prevotella(100);               |
| ### | 2 | 2 | 0 | 0 | Bacteria(100);"Bacteroidetes"(100);Flavobacteria(100);"Flavobacteriales"(100);Flavobacteriaceae(100);Flavobacterium(100);       |
| ### | 1 | 1 | 0 | 0 | Bacteria(100);"Proteobacteria"(100);Betaproteobacteria(100);Burkholderiales(100);Comamonadaceae(100);unclassified(100);         |
| ### | 2 | 2 | 0 | 0 | Bacteria(100);Firmicutes(100);Bacilli(100);Lactobacillales(100);Streptococcaceae(100);Streptococcus(100);                       |
| ### | 2 | 2 | 0 | 0 | Bacteria(100);"Proteobacteria"(100);Epsilonproteobacteria(100);Campylobacterales(100);Helicobacteraceae(100);Helicobacter(100); |
| ### | 1 | 1 | 0 | 0 | Bacteria(100);"Chloroflexi"(100);unclassified(100);unclassified(100);unclassified(100);unclassified(100);                       |

|     |   |   |   |   |                                                                                                                                                                                                                                                            |
|-----|---|---|---|---|------------------------------------------------------------------------------------------------------------------------------------------------------------------------------------------------------------------------------------------------------------|
| ### | 1 | 1 | 0 | 0 | Bacteria(100);"Proteobacteria"(100);Betaproteobacteria(100);Burkholderiales(100);unclassified(100);unclassified(100);                                                                                                                                      |
| ### | 1 | 1 | 0 | 0 | Bacteria(100);"Proteobacteria"(100);Alphaproteobacteria(100);Rhodospirillales(100);Acetobacteraceae(100);unclassified(100);                                                                                                                                |
| ### | 1 | 1 | 0 | 0 | Bacteria(100);unclassified(100);unclassified(100);unclassified(100);unclassified(100);unclassified(100);                                                                                                                                                   |
| ### | 2 | 2 | 0 | 0 | Bacteria(100);unclassified(100);unclassified(100);unclassified(100);unclassified(100);unclassified(100);                                                                                                                                                   |
| ### | 1 | 1 | 0 | 0 | Bacteria(100);"Actinobacteria"(100);Actinobacteria(100);Bifidobacteriales(100);Bifidobacteriaceae(100);Gardnerella(100);<br>Bacteria(100);"Proteobacteria"(100);Gammaproteobacteria(100);"Enterobacteriales"(100);Enterobacteriaceae(100);unclassified(100 |
| ### | 3 | 3 | 0 | 0 | );                                                                                                                                                                                                                                                         |
| ### | 1 | 1 | 0 | 0 | Bacteria(100);unclassified(100);unclassified(100);unclassified(100);unclassified(100);unclassified(100);                                                                                                                                                   |
| ### | 1 | 1 | 0 | 0 | Bacteria(100);"Fusobacteria"(100);"Fusobacteria"(100);"Fusobacteriales"(100);"Fusobacteriaceae"(100);unclassified(100);                                                                                                                                    |
| ### | 1 | 1 | 0 | 0 | Bacteria(100);unclassified(100);unclassified(100);unclassified(100);unclassified(100);unclassified(100);                                                                                                                                                   |
| ### | 2 | 2 | 0 | 0 | Bacteria(100);"Proteobacteria"(100);Deltaproteobacteria(100);Bdellovibrionales(100);Bacteriovoracaceae(100);Peredibacter(100);                                                                                                                             |
| ### | 1 | 1 | 0 | 0 | Bacteria(100);unclassified(100);unclassified(100);unclassified(100);unclassified(100);unclassified(100);                                                                                                                                                   |
| ### | 1 | 1 | 0 | 0 | Bacteria(100);"Bacteroidetes"(100);"Sphingobacteria"(100);"Sphingobacteriales"(100);Sphingobacteriaceae(100);unclassified(100);                                                                                                                            |
| ### | 1 | 1 | 0 | 0 | Bacteria(100);Firmicutes(100);Bacilli(100);Lactobacillales(100);Streptococcaceae(100);Streptococcus(100);                                                                                                                                                  |
| ### | 1 | 1 | 0 | 0 | Bacteria(100);Firmicutes(100);Bacilli(100);Bacillales(100);Staphylococcaceae(100);Staphylococcus(100);                                                                                                                                                     |
| ### | 1 | 1 | 0 | 0 | Bacteria(100);"Bacteroidetes"(100);Flavobacteria(100);"Flavobacteriales"(100);Flavobacteriaceae(100);unclassified(100);                                                                                                                                    |
| ### | 2 | 2 | 0 | 0 | Bacteria(100);Firmicutes(100);Clostridia(100);Clostridiales(100);Clostridiales_Incertae_Sedis_XI(100);Parvimonas(100);                                                                                                                                     |
| ### | 1 | 1 | 0 | 0 | Bacteria(100);"Proteobacteria"(100);Gammaproteobacteria(100);unclassified(100);unclassified(100);unclassified(100);                                                                                                                                        |
| ### | 1 | 1 | 0 | 0 | Bacteria(100);"Proteobacteria"(100);Betaproteobacteria(100);Neisseriales(100);Neisseriaceae(100);Bergeriella(100);                                                                                                                                         |
| ### | 1 | 1 | 0 | 0 | Bacteria(100);"Fusobacteria"(100);"Fusobacteria"(100);"Fusobacteriales"(100);"Fusobacteriaceae"(100);Fusobacterium(100);                                                                                                                                   |
| ### | 1 | 1 | 0 | 0 | Bacteria(100);"Bacteroidetes"(100);"Bacteroidia"(100);"Bacteroidales"(100);"Prevotellaceae"(100);Prevotella(100);                                                                                                                                          |
| ### | 1 | 1 | 0 | 0 | Bacteria(100);"Actinobacteria"(100);Actinobacteria(100);Actinomycetales(100);unclassified(100);unclassified(100);                                                                                                                                          |
| ### | 1 | 1 | 0 | 0 | Bacteria(100);"Proteobacteria"(100);Gammaproteobacteria(100);unclassified(100);unclassified(100);unclassified(100);                                                                                                                                        |
| ### | 1 | 1 | 0 | 0 | Bacteria(100);"Proteobacteria"(100);Betaproteobacteria(100);Neisseriales(100);Neisseriaceae(100);unclassified(100);                                                                                                                                        |
| ### | 1 | 1 | 0 | 0 | Bacteria(100);"Proteobacteria"(100);Alphaproteobacteria(100);unclassified(100);unclassified(100);unclassified(100);                                                                                                                                        |
| ### | 6 | 2 | 0 | 4 | Bacteria(100);Firmicutes(100);Bacilli(100);Bacillales(100);Listeriaceae(100);Brochothrix(100);                                                                                                                                                             |
| ### | 2 | 2 | 0 | 0 | Bacteria(100);unclassified(100);unclassified(100);unclassified(100);unclassified(100);unclassified(100);                                                                                                                                                   |
| ### | 1 | 1 | 0 | 0 | Bacteria(100);Firmicutes(100);Clostridia(100);Clostridiales(100);Lachnospiraceae(100);unclassified(100);                                                                                                                                                   |
| ### | 4 | 4 | 0 | 0 | Bacteria(100);"Actinobacteria"(100);Actinobacteria(100);Actinomycetales(100);Kineosporiaceae(100);unclassified(100);                                                                                                                                       |
| ### | 1 | 1 | 0 | 0 | Bacteria(100);unclassified(100);unclassified(100);unclassified(100);unclassified(100);unclassified(100);                                                                                                                                                   |

|     |   |   |   |   |                                                                                                                          |
|-----|---|---|---|---|--------------------------------------------------------------------------------------------------------------------------|
| ### | 1 | 1 | 0 | 0 | Bacteria(100);Firmicutes(100);Clostridia(100);Clostridiales(100);Clostridiales_Incertae_Sedis_XI(100);Anaerococcus(100); |
| ### | 1 | 1 | 0 | 0 | Bacteria(100);Firmicutes(100);Clostridia(100);Clostridiales(100);Clostridiales_Incertae_Sedis_XI(100);Anaerococcus(100); |
| ### | 2 | 2 | 0 | 0 | Bacteria(100);"Bacteroidetes"(100);unclassified(100);unclassified(100);unclassified(100);unclassified(100);              |

**Table S2: Genera taxonomic classifications and their abundance within each plant type**

**Legend:** irPMT represent transformed *Nicotiana attenuata* samples, WT represent *Nicotiana attenuata* normal samples, ISWT represent *N. glauca* samples.

|                                  | irPMT | WT    | ISWT  |
|----------------------------------|-------|-------|-------|
| <i>Abiotrophia</i>               | 0.03% |       |       |
| <i>Acidithiobacillus</i>         | 0.31% | 1.11% | 0.58% |
| <i>Acidovorax</i>                |       | 0.01% |       |
| <i>Actinomyces</i>               | 0.02% |       |       |
| <i>Aeromonas</i>                 | 0.14% | 0.03% | 0.05% |
| <i>Aggregatibacter</i>           | 0.15% | 0.06% | 0.04% |
| <i>Albidiferax</i>               | 0.01% | 0.01% | 0.01% |
| <i>Alistipes</i>                 | 0.02% |       |       |
| <i>Alkanindiges</i>              | 0.13% | 0.20% | 1.05% |
| <i>Anaerobacter</i>              | 0.02% |       | 0.03% |
| <i>Anaerococcus</i>              | 1.87% | 1.38% | 2.94% |
| <i>Anaerostipes</i>              | 0.04% |       |       |
| <i>Arcobacter</i>                | 0.42% | 0.14% |       |
| <i>Arsenicicoccus</i>            | 0.04% | 0.02% | 0.02% |
| <i>Arthrobacter</i>              | 0.01% |       | 0.01% |
| <i>Atopobium</i>                 | 0.02% |       |       |
| <i>Bacteroides</i>               | 0.17% | 0.12% | 0.05% |
| <i>Balneimonas</i>               | 0.07% | 0.01% | 0.07% |
| <i>Bergeriella</i>               | 0.21% | 0.15% |       |
| <i>Bifidobacterium</i>           | 1.52% | 0.29% |       |
| <i>Blastococcus</i>              | 0.05% |       |       |
| <i>Blastomonas</i>               | 0.02% |       |       |
| <i>Blautia</i>                   | 0.01% |       |       |
| <i>Bosea</i>                     | 0.01% |       |       |
| <i>Brachybacterium</i>           | 0.01% |       |       |
| <i>Brevibacterium</i>            | 7.02% | 7.73% | 5.19% |
| <i>Brevundimonas</i>             | 0.01% |       |       |
| <i>Brochothrix</i>               | 0.01% |       |       |
| <i>Bulleidia</i>                 | 0.01% |       |       |
| <i>Burkholderia</i>              | 0.02% |       |       |
| <i>Campylobacter</i>             | 0.01% |       |       |
| <i>Capnocytophaga</i>            | 0.38% | 0.00% | 0.05% |
| <i>Cardiobacterium</i>           | 0.01% |       |       |
| <i>Carnobacterium</i>            | 0.01% |       |       |
| <i>Catelicoccus</i>              | 0.79% | 0.87% | 0.38% |
| <i>Catenibacterium</i>           | 0.02% |       |       |
| <i>Caulobacter</i>               | 0.01% |       |       |
| <i>Cellvibrio</i>                | 1.15% | 0.38% | 1.18% |
| <i>Centipeda</i>                 | 0.16% | 0.15% | 0.03% |
| <i>Cetobacterium</i>             | 3.24% | 2.87% | 0.94% |
| <i>Chitinimonas</i>              | 0.03% |       |       |
| <i>Chryseobacterium</i>          | 0.02% |       | 0.07% |
| <i>Cloacibacterium</i>           | 0.04% |       |       |
| <i>Clostridium_sensu_stricto</i> | 0.05% |       |       |
| <i>Clostridium_XI</i>            | 0.02% | 0.02% | 0.01% |

|                                      |        |        |       |
|--------------------------------------|--------|--------|-------|
| <i>Clostridium_XIVb</i>              | 0.01%  |        |       |
| <i>Collinsella</i>                   | 0.01%  |        |       |
| <i>Comamonas</i>                     | 0.01%  |        |       |
| <i>Corynebacterium</i>               | 0.01%  |        |       |
| <i>Cupriavidus</i>                   | 0.02%  |        |       |
| <i>Curvibacter</i>                   | 0.02%  |        |       |
| <i>Deinococcus</i>                   |        |        |       |
| <i>Delftia</i>                       | 0.31%  | 0.26%  | 0.46% |
| <i>Desulfovibrio</i>                 | 0.01%  |        |       |
| <i>Devosia</i>                       | 0.01%  |        |       |
| <i>Dietzia</i>                       | 0.02%  |        | 0.02% |
| <i>Enhydrobacter</i>                 | 0.06%  | 0.01%  |       |
| <i>Enterococcus</i>                  | 0.02%  |        |       |
| <i>Epilithonimonas</i>               | 0.06%  |        | 0.02% |
| <i>Eubacterium</i>                   | 0.10%  | 0.05%  |       |
| <i>Exiguobacterium</i>               | 0.00%  |        | 0.01% |
| <i>Facklamia</i>                     | 0.01%  |        |       |
| <i>Filifactor</i>                    | 0.09%  | 0.02%  |       |
| <i>Fingoldia</i>                     | 0.05%  | 0.04%  |       |
| <i>Fluviicola</i>                    | 0.00%  |        |       |
| <i>Frateuria</i>                     | 0.02%  | 0.01%  |       |
| <i>Friedmanniella</i>                | 0.37%  | 0.34%  | 0.23% |
| <i>Fusobacterium</i>                 | 0.07%  |        |       |
| <i>Gardnerella</i>                   | 0.01%  |        |       |
| <i>Gemella</i>                       | 0.02%  |        |       |
| <i>Gemmatimonas</i>                  | 0.24%  | 0.02%  | 0.06% |
| <i>Gordonia</i>                      | 0.04%  |        |       |
| <i>Gp4</i>                           | 0.01%  |        |       |
| <i>Gp6</i>                           | 0.01%  |        |       |
| <i>Granulicatella</i>                | 0.02%  |        |       |
| <i>Haematobacter</i>                 | 0.16%  | 0.75%  | 0.15% |
| <i>Haemophilus</i>                   | 0.01%  |        |       |
| <i>Halomonas</i>                     | 0.05%  |        |       |
| <i>Herbaspirillum</i>                | 0.04%  |        | 0.02% |
| <i>Howardella</i>                    | 0.03%  |        |       |
| <i>Hydrotalea</i>                    | 0.02%  |        |       |
| <i>Idiomarina</i>                    | 0.44%  | 0.18%  | 0.02% |
| <i>Ilumatobacter</i>                 | 0.01%  |        |       |
| <i>Janibacter</i>                    | 0.02%  |        |       |
| <i>Johnsonella</i>                   | 0.01%  |        |       |
| <i>Kingella</i>                      | 8.02%  | 4.61%  | 1.12% |
| <i>Kocuria</i>                       | 1.29%  | 1.06%  | 1.25% |
| <i>Kytococcus</i>                    | 0.23%  | 0.17%  | 0.04% |
| <i>Lachnospiracea_incertae_sedis</i> | 0.03%  |        |       |
| <i>Lactobacillus</i>                 | 0.03%  |        |       |
| <i>Lactococcus</i>                   | 20.68% | 24.51% | 8.21% |
| <i>Legionella</i>                    | 0.54%  | 0.39%  | 0.64% |
| <i>Leptotrichia</i>                  | 0.03%  |        |       |
| <i>Leuconostoc</i>                   | 0.07%  | 0.28%  |       |
| <i>Lysobacter</i>                    | 0.03%  |        |       |

|                                             |       |       |       |
|---------------------------------------------|-------|-------|-------|
| <i>Mannheimia</i>                           | 1.85% | 1.42% | 1.34% |
| <i>Marinobacter</i>                         | 0.01% |       |       |
| <i>Marmoricola</i>                          | 0.05% |       | 0.02% |
| <i>Massilia</i>                             | 0.04% | 0.01% | 0.08% |
| <i>Megamonas</i>                            | 0.05% | 0.01% | 0.01% |
| <i>Meiothermus</i>                          | 0.01% |       |       |
| <i>Methylobacterium</i>                     | 0.01% |       |       |
| <i>Micrococcus</i>                          |       |       | 0.01% |
| <i>Mobiluncus</i>                           | 0.01% |       |       |
| <i>Modestobacter</i>                        | 0.01% |       |       |
| <i>Mogibacterium</i>                        | 0.07% | 0.02% |       |
| <i>Moraxella</i>                            | 0.02% |       |       |
| <i>Mycobacterium</i>                        | 0.03% |       |       |
| <i>Mycoplasma</i>                           | 0.02% |       |       |
| <i>Naxibacter</i>                           | 0.07% |       | 0.01% |
| <i>Negativicoccus</i>                       | 0.32% | 0.51% | 0.03% |
| <i>Neisseria</i>                            | 0.04% |       |       |
| <i>Nesterenkonia</i>                        | 4.18% | 7.69% | 1.35% |
| <i>Nocardioides</i>                         | 0.03% |       |       |
| <i>Nubsella</i>                             | 0.06% |       |       |
| <i>Ochrobactrum</i>                         | 0.03% |       |       |
| <i>Olsenella</i>                            | 0.01% |       |       |
| <i>OP11_genus_incertae_sedis</i>            | 0.09% | 0.02% | 0.01% |
| <i>Paenibacillus</i>                        | 0.00% |       |       |
| <i>Paracoccus</i>                           | 0.15% | 0.06% | 0.01% |
| <i>Paraprevotella</i>                       | 1.36% | 0.61% | 0.08% |
| <i>Parvimonas</i>                           | 1.06% | 0.64% | 0.62% |
| <i>Pedobacter</i>                           | 0.04% |       |       |
| <i>Pelomonas</i>                            | 0.02% |       |       |
| <i>Peptococcus</i>                          | 0.02% |       |       |
| <i>Peptoniphilus</i>                        | 0.03% | 0.01% |       |
| <i>Peptostreptococcaceae_incertae_sedis</i> | 0.28% | 0.19% | 0.21% |
| <i>Peptostreptococcus</i>                   | 0.01% |       |       |
| <i>Phycococcus</i>                          | 0.05% |       |       |
| <i>Porphyromonas</i>                        | 0.08% | 0.03% |       |
| <i>Prevotella</i>                           | 0.03% | 0.00% | 0.01% |
| <i>Propioniferax</i>                        | 0.01% |       |       |
| <i>Prostheco bacter</i>                     | 0.00% |       |       |
| <i>Pseudolabrys</i>                         | 0.06% |       |       |
| <i>Pseudomonas</i>                          | 0.27% | 0.03% | 0.06% |
| <i>Psychrobacter</i>                        | 0.02% |       |       |
| <i>Ralstonia</i>                            | 0.01% |       |       |
| <i>Rheinheimera</i>                         | 0.01% |       |       |
| <i>Rhizobium</i>                            | 0.01% |       |       |
| <i>Rhodanobacter</i>                        | 0.01% |       |       |
| <i>Rhodoferax</i>                           | 0.08% | 0.02% | 0.07% |
| <i>Roseomonas</i>                           | 0.01% |       |       |
| <i>Rothia</i>                               | 0.18% | 0.04% | 0.07% |
| <i>Rubrobacter</i>                          | 0.02% |       |       |
| <i>Ruminococcus</i>                         | 0.06% |       |       |

|                                    |       |       |       |
|------------------------------------|-------|-------|-------|
| <i>Sediminibacterium</i>           | 0.01% |       |       |
| <i>Segetibacter</i>                | 0.07% |       |       |
| <i>Selenomonas</i>                 | 0.98% | 0.48% | 0.57% |
| <i>Serratia</i>                    | 0.03% | 0.02% | 0.01% |
| <i>Sphingobacterium</i>            | 0.01% |       |       |
| <i>Sphingobium</i>                 | 0.20% | 0.01% | 0.04% |
| <i>Sphingomonas</i>                | 0.02% |       |       |
| <i>Sphingopyxis</i>                | 0.02% |       |       |
| <i>SR1_genus_incertainae_sedis</i> | 0.29% | 0.03% |       |
| <i>Staphylococcus</i>              | 0.07% |       |       |
| <i>Stenotrophomonas</i>            | 0.01% |       |       |
| <i>Streptophyta</i>                | 0.02% |       |       |
| <i>Sulfurospirillum</i>            | 0.02% |       |       |
| <i>Sutterella</i>                  | 0.12% | 0.01% | 0.13% |
| <i>Syntrophococcus</i>             | 0.48% | 0.10% | 0.03% |
| <i>Tannerella</i>                  | 0.15% | 0.03% | 0.02% |
| <i>Thiofaba</i>                    | 0.00% |       |       |
| <i>TM7_genus_incertainae_sedis</i> | 1.45% | 0.63% | 0.13% |
| <i>Treponema</i>                   | 0.03% |       |       |
| <i>Trichococcus</i>                | 0.39% | 0.43% | 0.13% |
| <i>Turicella</i>                   | 0.09% |       |       |
| <i>unclassified</i>                | 7.70% | 8.24% | 3.27% |
| <i>unclassified</i>                | 4.48% | 4.39% | 1.35% |
| <i>unclassified</i>                | 1.86% | 1.87% | 0.33% |
| <i>unclassified</i>                | 1.75% | 0.65% | 1.45% |
| <i>unclassified</i>                | 1.35% | 1.00% | 1.07% |
| <i>unclassified</i>                | 1.29% | 0.90% | 0.45% |
| <i>unclassified</i>                | 1.29% | 1.52% | 0.77% |
| <i>unclassified</i>                | 1.17% | 0.57% | 0.07% |
| <i>unclassified</i>                | 1.12% | 0.34% | 0.49% |
| <i>unclassified</i>                | 0.90% | 0.85% | 0.45% |
| <i>unclassified</i>                | 0.87% | 0.38% | 0.30% |
| <i>unclassified</i>                | 0.53% | 0.21% |       |
| <i>unclassified</i>                | 0.50% | 0.29% | 0.54% |
| <i>unclassified</i>                | 0.39% | 0.19% | 0.34% |
| <i>unclassified</i>                | 0.35% | 0.20% | 0.12% |
| <i>unclassified</i>                | 0.20% | 1.65% |       |
| <i>unclassified</i>                | 0.18% | 0.09% | 0.06% |
| <i>unclassified</i>                | 0.15% | 0.04% | 0.03% |
| <i>unclassified</i>                | 0.10% | 0.02% | 0.06% |
| <i>unclassified</i>                | 0.10% |       |       |
| <i>unclassified</i>                | 0.08% | 0.01% |       |
| <i>unclassified</i>                | 0.07% |       |       |
| <i>unclassified</i>                | 0.07% |       |       |
| <i>unclassified</i>                | 0.06% |       |       |
| <i>unclassified</i>                | 0.06% |       | 0.15% |
| <i>unclassified</i>                | 0.06% | 0.04% |       |
| <i>unclassified</i>                | 0.05% |       |       |
| <i>unclassified</i>                | 0.05% |       |       |
| <i>unclassified</i>                | 0.04% | 0.19% | 1.09% |
